# Supplementary material for: MicroRNA-138-5p Targets Pro-Apoptotic Factors and Favors Neural Cell Survival: Analysis in the Injured Spinal Cord
Source: MDPI journal article supplement (doi:10.3390/biomedicines10071559), 2022-06-30
Supplement: s1 [file s1]

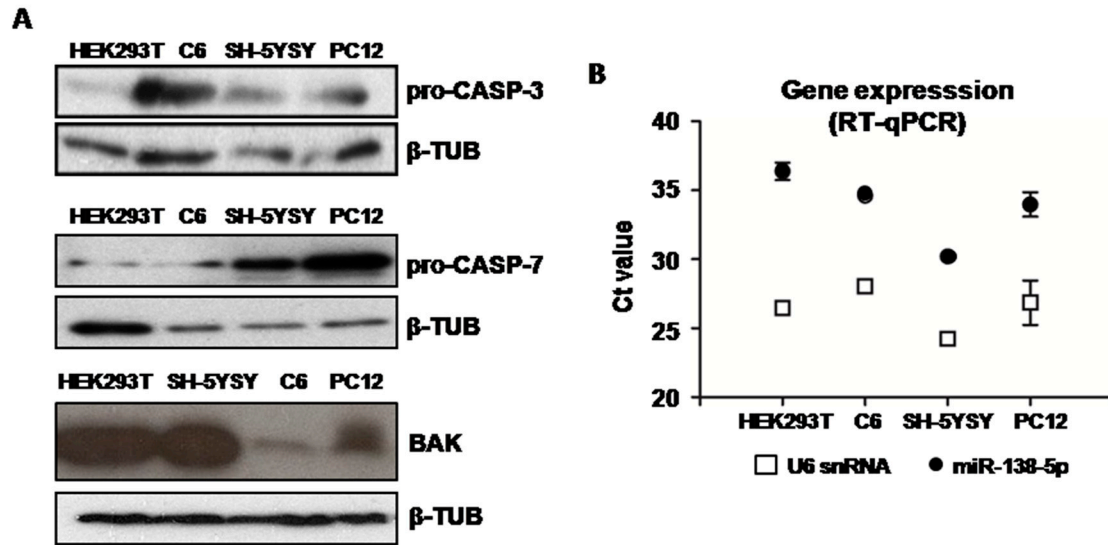

**Figure S1.** Endogenous expression of miR-138-5p and its targets in different cell lines. (A) Endogenous expression of pro-CASP-3, pro-CASP-7 and BAK proteins, and (B) miR-138-5p microRNA in HEK293T, C6, SH-SY5Y and PC12 cell lines. MicroRNA expression was measured by RT-qPCR, whereas the protein expression of its targets was estimated by immunoblot (the image shown is a representative example). Complete blot images are available at OSF (<https://osf.io/yqn58/>). All experiments were carried out in triplicates.
