# Supplementary material for: MicroRNA-138-5p Targets Pro-Apoptotic Factors and Favors Neural Cell Survival: Analysis in the Injured Spinal Cord
Source: MDPI journal article supplement (doi:10.3390/biomedicines10071559), 2022-06-30
Supplement: s1 [file s1]

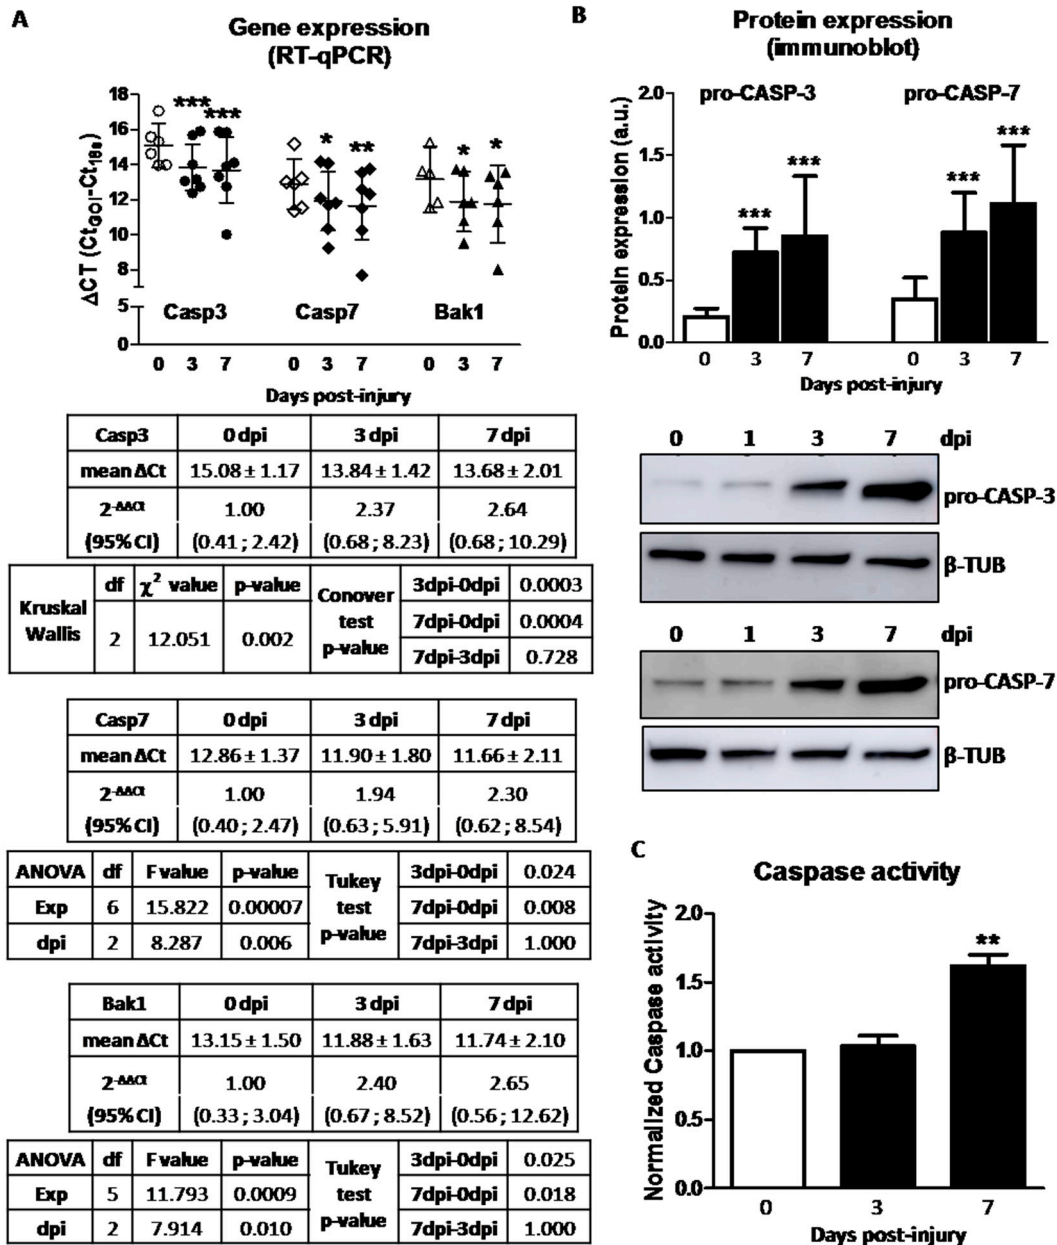

**Figure S4.** Expression and activity of caspase 3, caspase 7 and BAK1 increases at 3 and 7 days after SCI. (A) RT-qPCR showing relative Casp3, Casp7 and Bak1 expressions in RNA isolated from spinal cord samples collected at 0, 3 and 7 dpi. Dot plots represent mRNA expression as the average of  $\Delta Ct \pm 95\%$  CI. Tables show the mRNA expression of Casp3, Casp7 and Bak1 as the mean  $\Delta Ct$  and the fold change  $2^{-\Delta\Delta Ct}$  (values and limits in folds of the 95% CI) from, at least, five individuals per time. Statistical analysis was carried out through Kruskal-Wallis test or two-way ANOVA and Tukey post-hoc tests. (B) Protein expression of pro-CASP-3 and pro-CASP-7 at 0, 3 and 7 dpi. The bar graph shows the densitometry data of each apoptotic protein after SCI. Bars correspond to the average  $\pm$  SD of six animals. Statistical analysis was carried out through Kruskal-Wallis and Conover post-hoc tests. Complete blot images are available as supplementary material (<https://osf.io/yqn58/>). (C) Effector caspase activity of samples of 0, 3 and 7 dpi rats. Bars represent the average  $\pm$  SD of four animals. Statistical significance of the changes was carried out through one-way ANOVA and Tukey post-hoc tests. \*, \*\* and \*\*\* denote significant differences ( $p < 0.05$ ,  $p < 0.01$  and  $p < 0.001$ , respectively) relative to control animals.
