# Supplementary material for: MicroRNA-138-5p Targets Pro-Apoptotic Factors and Favors Neural Cell Survival: Analysis in the Injured Spinal Cord
Source: MDPI journal article supplement (doi:10.3390/biomedicines10071559), 2022-06-30
Supplement: s1 [file s1]

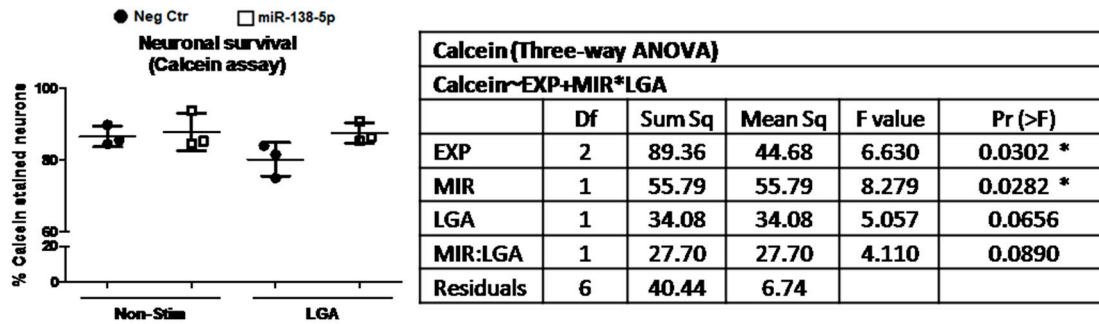

**Figure S2.** MiR-138-5p induces neuronal survival after LGA treatment. Neuronal survival (% of calcein-AM stained cells) was analyzed in hippocampal neuron cultures transfected with either miR-138-5p (white squares) or negative control (Neg Ctr; black circles) mimics followed by LGA stimulation. Dot plots represent the average  $\pm$  SD of three independent experiments. Table details the results from the three-way ANOVA analyses. EXP codes for the experiment block factor; MIR for mir-138-5p transfection; and LGA for LGA stimulation.
