# Supplementary material for: MicroRNA-138-5p Targets Pro-Apoptotic Factors and Favors Neural Cell Survival: Analysis in the Injured Spinal Cord
Source: MDPI journal article supplement (doi:10.3390/biomedicines10071559), 2022-06-30
Supplement: s1 [file s1]

**A**

| Probes                 | Sequence                                      |
|------------------------|-----------------------------------------------|
| miR-138-5p             | 5'-(C)GG(C)CU(G)AU(T)UA(T)AA(C)AC(C)AG(CT)-3' |
| cel-miR-67 (Neg. Ctr.) | 5'-G(T)GU(A)AC(A)CG(T)CU(A)UA(C)GC(C)CA-3'    |

**B**

| Immunoblotting antibodies                                                     | Comercial reference and antibody registry ID         | Dilution |
|-------------------------------------------------------------------------------|------------------------------------------------------|----------|
| Rabbit anti-CASP-3                                                            | Cell Signaling Technology Cat#9662, RRID:AB_10694681 | 1:1000   |
| Rabbit anti-CASP-7                                                            | Cell Signaling Technology Cat#9492, RRID:AB_10831368 | 1:1000   |
| Rabbit anti-BAK                                                               | Cell Signaling Technology Cat#3814, RRID:AB_2290287  | 1:1000   |
| Mouse anti -beta-tubulin                                                      | Sigma-Aldrich Cat#T5293, RRID:AB_477580              | 1:10000  |
| HRP-conjugated goat anti-rabbit                                               | Thermo Fisher Scientific Cat#31460, RRID:AB_228341   | 1:1000   |
| HRP-conjugated goat anti-mouse                                                | Thermo Fisher Scientific Cat#31430, RRID:AB_228307   | 1:1000   |
| Immunofluorescence antibodies                                                 | Comercial reference and antibody registry ID         | Dilution |
| Mouse anti-Glial Fibrillary Acidic Protein (GFAP), clone GA5                  | Millipore Cat#MAB3402, RRID:AB_94844                 | 1:250    |
| Rabbit anti-NeuN                                                              | Millipore Cat#ABN78, RRID:AB_10807945                | 1:250    |
| Mouse anti-Adenomatous Polyposis Coli (Ab-7) (APC)                            | Millipore Cat#OP80, RRID:AB_2057371                  | 1:250    |
| Mouse anti-Tubulin, beta III isoform, C-terminus, clone TU-20                 | Millipore Cat#MAB1637, RRID:AB_2210524               | 1:500    |
| Rabbit anti-CASP-3                                                            | Cell Signaling Technology Cat#9662, RRID:AB_10694681 | 1:300    |
| Rabbit anti-CASP-7                                                            | Cell Signaling Technology Cat#9492, RRID:AB_10831368 | 1:100    |
| Alexa 594-conjugated goat anti-mouse IgG2a                                    | Innovative Research Cat#A21135, RRID:AB_1500827      | 1:500    |
| Alexa 488-conjugated goat anti-mouse IgG (H+L) highly cross-adsorbed antibody | Molecular Probes Cat#A-11029, RRID:AB_138404         | 1:250    |
| Alkaline phosphatase conjugated sheep-anti-digoxigenin                        | Roche Cat#11093274910, RRID:AB_514497                | 1:400    |

C

| Primer                      | Sequence                             |
|-----------------------------|--------------------------------------|
| Casp3 SacI-sense            | 5'-CCGGAGCTCTTGGGAGTGGGGTAGG-3'      |
| Casp3 Sall-antisense        | 5'-CTTGTCGACATTGTCACATGGGAACAC-3'    |
| Casp3-Mut138 NheI-sense     | 5'-TAATTTTACGCTAGCAAAATATC-3'        |
| Casp3-Mut138 NheI-antisense | 5'-GATATTTTGCTAGCGTAAAATT-3'         |
| Casp7 SacI-sense            | 5'-ACTGAGCTCCTGCTGTCATTCACTGATG-3'   |
| Casp7 Sall-antisense        | 5'-GTCGTCGACTTATTAGGAGGGGAAAACAGG-3' |
| Casp7-Mut138 NheI-sense     | 5'-GCCCATATCGCTAGCCGCCTTACC-3'       |
| Casp7-Mut138 NheI-antisense | 5'-GGTAAGGCGGCTAGCGATATGGGC-3'       |
| Bak1 NheI-sense             | 5'-GCTAGCGAGCTCCAGCCACATGACTGC-3'    |
| Bak1 Sall-antisense         | 5'-TGCGTCGACTATTTCCAGACACCGAGG-3'    |
| Bak1-Mut138 EcoR1-sense     | 5'-CGCTAGAGAACTGAATTCAAAAGCAAC-3'    |
| Bak1-Mut138 EcoR1-antisense | 5'-GTTGCTTTTGAATTCAGTTCTCTAGCG-3'    |
| Fadd SacI-sense             | 5'-GAGCTCTGCTGTGGAGGGAGCACC-3'       |
| Fadd Sall-antisense         | 5'-GTCGACAAGAAATGGTTTATTTGGCCG-3'    |

**Table S1.** Probes, antibodies and primers employed in this study. (A) Sequences of the oligonucleotide probes employed for FISH analysis of miR-138-5p and the negative control. FISH probes are composed of 2' -O-methyl and LNA (marked as () in the sequence) nucleotides according to the designs of Søe and cols.[27]. (B) Primary and secondary antibodies used for immunoblotting and immunofluorescence. Antibody registry ID corresponds to the unique identification of each antibody assigned by The Antibody Registry webpage (<https://antibodyregistry.org/>). (C) PCR primers employed in the subcloning of the 3' UTR regions of Casp3, Casp7, Bak1 and Fadd.
