# Supplementary material for: MicroRNA-138-5p Targets Pro-Apoptotic Factors and Favors Neural Cell Survival: Analysis in the Injured Spinal Cord
Source: Biomedicines. 2022 Jun 30;10(7):1559. doi: 10.3390/biomedicines10071559 (PMC9312482; doi:10.3390/biomedicines10071559)
Supplement: Supplementary file 1 [file biomedicines-10-01559-s001.zip › Table S2. M. Maza and Barreda-Manso et al..xls]

## Sheet: S2. Predicted targets
Table S2. List of miR-138-5p targets identified by the prediction programs. Full list of mir-138-5p targets predicted by TargetScan7.1 (http://www.targetscan.org), miRmap (http://mirmap.ezlab.org/), miRanda (http://www.microrna.org), and miRWalk2.0 (http://zmf.umm.uni-heidelberg.de/apps/zmf/mirwalk2).
Article title: MicroRNA-138-5p targets pro-apoptotic factors and favours neural cell survival: analysis in the injured spinal cord
Authors: Rodrigo M Maza, M. Asunción Barreda-Manso, David Reigada, Agata Silván, Teresa Muñoz-Galdeano, Altea Soto, Ángela del Águila, Manuel Nieto-Diaz
Supplementary Table S2. List of miR-138-5p targets identified by the prediction programs. Full list of mir-138-5p targets predicted by TargetScan7.1 (http://www.targetscan.org), miRmap (http://mirmap.ezlab.org/), miRanda (http://www.microrna.org), and miRWalk2.0 (http://zmf.umm.uni-heidelberg.de/apps/zmf/mir walk2).
Target gene symbol	miRWalk (1743)	TargetScan (2989)	miRanda (1159)	mirmap (2092)
Aadacl3		x
Aagab		x
Aak1	x	x
Aanat			x	x
Aar2		x
Aard		x	x	x
Aars2				x
Aarsd1			x	x
Abca13		x
Abcb9	x	x	x
Abcc10				x
Abcc12		x
Abcd2	x	x	x	x
Abce1				x
Abcf2	x	x
Abcf3		x
Abcg1	x	x	x	x
Abcg3l2			x
Abhd13				x
Abhd5		x
Abhd6	x		x	x
Abi2	x	x		x
Abi3bp		x
Abl2		x
Ablim1		x
Ablim2		x
Abpa				x
Abr	x			x
Abra		x
Abtb2	x	x		x
Ac004381.6		x
Ac004899.1		x
Ac005609.1		x
Ac007952.5		x
Ac008964.1		x
Ac010327.2		x
Ac011897.1		x
Ac026310.1		x
Ac103801.2		x
Ac106017.1		x
Ac107021.1		x
Ac112693.2		x
Ac138655.1		x
Ac174470.1		x
Acaa1			x
Acaa2			x	x
Acad11		x
Acap1				x
Acap2		x		x
Acap3	x	x		x
Acbd3		x	x	x
Accn4			x	x
Ace		x
Ackr2	x	x
Acp5	x	x
Acp6		x
Acpl2		x	x	x
Acrbp	x		x
Acsbg1			x	x
Acsl1			x	x
Acsl6		x
Acss1	x	x		x
Actl6b				x
Actr1a				x
Actr1b	x			x
Acvr2a		x
Acvr2b		x
Adam11		x
Adam12		x
Adam17	x	x	x	x
Adam19	x	x
Adam22		x
Adam30	x			x
Adam7	x	x		x
Adam8	x	x
Adamts12	x			x
Adamts14	x
Adamts15				x
Adamts16		x
Adamts17		x
Adamts2		x
Adamts5		x
Adamts6	x
Adamtsl3	x	x
Adarb2		x
Adat2		x
Adck4	x		x	x
Adcy2		x
Adcy5			x
Adcy6			x	x
Adcy7		x
Adcyap1			x
Adcyap1r1	x	x
Add3		x
Adh1			x
Adh7		x	x	x
Adipoq	x			x
Adnp	x	x		x
Ado		x		x
Adra2b			x
Adrbk2		x
Aebp2		x
Aen	x
Afap1	x	x	x	x
Afap1l1	x			x
Aff3		x
Aff4	x
Afg3l1				x
Afm				x
Agbl3				x
Agfg1		x
Agfg2		x
Agk		x
Agl		x		x
Agtpbp1		x
Agtr2		x
Ahcyl2	x	x
Ahdc1		x		x
Ahr			x
Ahsa2		x		x
Aif1l	x	x		x
Aifm2		x		x
Aip	x		x	x
Aire	x
Ajuba	x
Ak1	x	x
Ak2			x
Akap1		x	x	x
Akap13	x	x		x
Akap2	x	x	x	x
Akap6		x
Akap7		x	x	x
Akp3			x
Akr1b8			x
Akr1c14			x
Akr1e2		x
Akr7a2		x
Akt1s1	x			x
Akt2		x
Akt3		x
Al021546.6		x
Al033381.1		x
Al078585.1		x
Al117190.3		x
Al590483.1		x
Al626787.1		x
Alcam		x
Aldh1a1	x	x	x	x
Aldh1a2	x		x	x
Aldh1a3		x
Aldh1b1			x
Aldh4a1	x	x
Aldh5a1		x
Aldh6a1		x		x
Aldob			x
Alg1		x
Alg13	x		x	x
Alg6	x			x
Alkbh1	x
Alox5ap		x
Alpk2	x	x
Alppl2		x
Als2cl	x
Alx1	x	x	x	x
Alyref	x
Amdhd2		x
Amer2		x
Amfr		x
Amigo1		x
Amigo2			x
Ammecr1		x
Amot		x
Amotl2	x	x		x
Amph		x
Amz2			x
AMZ2_RAT				x
Anapc10		x		x
Anapc11	x	x
Anapc15	x
Anapc16	x	x
Angel2				x
Angpt1		x	x	x
Angpt4	x	x		x
Angptl5		x
Ank1		x		x
Ank2		x		x
Ankfy1	x	x
Ankh		x
Ankrd1	x		x	x
Ankrd10		x		x
Ankrd13a			x	x
Ankrd13b	x	x
Ankrd23				x
Ankrd24				x
Ankrd28	x
Ankrd31		x
Ankrd33b		x
Ankrd34a	x		x	x
Ankrd44	x	x
Ankrd45		x
Ankrd54	x	x	x	x
Ankrd63		x
Anks1a	x	x		x
Anks3			x	x
Anks6		x	x
Ano1	x	x		x
Ano10	x	x
Ano6	x			x
Antxr1	x			x
Antxr2	x	x
Anxa13		x		x
Anxa3	x
Anxa4		x	x	x
Anxa5			x
Anxa6		x	x	x
Anxa7				x
Anxa8			x	x
Aox1		x
Ap001816.1		x
Ap1g2		x
Ap2b1	x		x	x
Ap3d1	x			x
Ap3m1	x	x	x	x
Ap5m1		x
Ap5z1		x
Apba2		x
Apbb2	x	x
Apbb3			x
Apc2		x		x
Apcdd1l	x
Aph1b		x
Api5	x			x
Aplp2		x
Apoa4	x			x
Apob48r				x
Apobr	x	x
Apoc4		x
Apoe			x	x
Apold1		x	x
Appbp2	x	x		x
Aqr	x	x		x
Ar		x
Araf			x	x
Arap1		x
Arc	x	x	x	x
Ard1b			x	x
Arel1		x
Arf1		x	x
Arfgap1		x	x
Arfgef2		x
Arfip1			x
Arg1			x
Arglu1		x	x
Arhgap1	x	x
Arhgap10	x	x		x
Arhgap12	x	x		x
Arhgap19-Slit1		x
Arhgap20		x
Arhgap22	x	x		x
Arhgap25	x			x
Arhgap28		x
Arhgap31	x
Arhgap32		x
Arhgap35	x	x
Arhgap4	x	x	x	x
Arhgap42	x	x		x
Arhgap44		x
Arhgap6		x
Arhgef12		x
Arhgef16	x	x
Arhgef17	x	x
Arhgef18	x	x		x
Arhgef19	x			x
Arhgef2	x	x		x
Arhgef28	x
Arhgef3	x	x		x
Arhgef33		x
Arhgef38		x
Arhgef39		x
Arhgef40		x
Arhgef7		x		x
Arid3b	x	x		x
Arid5a			x
Arih1				x
Arih2	x			x
Arl2	x	x	x	x
Arl2bp	x	x	x	x
Arl4c	x	x
Arl5a		x
Arl5b	x	x	x	x
Arl6ip5		x	x	x
Arl8a	x	x		x
Armc7	x			x
Armc8	x	x
Armc9	x			x
Armcx2	x	x
Arnt2	x	x	x	x
Arntl2		x
Arpc2		x
Arpc5		x	x	x
Arpp21	x
Arrb1		x
Arrb2		x
Arrdc1				x
Arrdc3		x
Artn			x	x
Arvcf				x
Arx	x
ARX_RAT				x
Asam			x	x
Asap2	x
Asap3		x
Asb14		x
Asb4			x
Asf1b	x	x		x
Aspg			x	x
Aspscr1	x
Astl	x			x
Astn1	x	x
Asxl2		x
Asxl3		x
Atad2b		x
Atf3	x		x	x
Atf7ip2			x
Atg12	x		x	x
Atg2a	x	x		x
Atg2b		x
Atg3			x	x
Atg7	x	x	x	x
Atoh8	x	x		x
Atp11b		x
Atp11c	x	x
Atp13a4		x
Atp1a2	x	x		x
Atp1b4	x	x	x	x
Atp2b2		x		x
Atp2b4		x
Atp4b	x	x	x	x
Atp5e		x
Atp5i		x
Atp5j2-Ptcd1		x
Atp5sl			x	x
Atp6v1a		x		x
Atp6v1g3	x	x		x
Atp8a1		x
Atp9a		x
Atp9b				x
Atpaf2		x
Atrnl1	x
Atxn2		x
Atxn7l1		x
Atxn7l3	x
Avpi1		x	x	x
Avpr1a		x
Avpr1b			x
Awat2		x
Axin1	x	x	x	x
Azgp1	x		x	x
Azin1			x
B0BMY5_RAT				x
B0BN59_RAT				x
B1WC03_RAT				x
B2RYK0_RAT				x
B2RYL4_RAT				x
B2RYN9_RAT				x
B3galnt2				x
B3galt1		x
B3galt2	x	x		x
B3galt5	x	x		x
B3galtl	x	x
B3gnt3	x			x
B3gnt9		x
B3gntl1			x
B4F794_RAT				x
B4galt4			x	x
B4galt6		x	x	x
B5DF39_RAT				x
B5DF42_RAT				x
Bach1		x
Bag1		x
Bag4		x		x
Bahcc1	x
Bai1	x	x
Baiap2		x	x
Bak1	x	x	x	x
Bap1	x	x		x
Baz1b	x	x
Bbs10		x
Bbs12	x
Bbx		x
Bcan	x	x	x
Bcap29		x
Bcas1		x
Bcas3	x	x
Bckdk	x		x	x
Bcl2l1			x	x
Bcl2l11		x
Bcl2l2	x		x	x
Bcl9l		x
Bdkrb2			x	x
Bdnf		x	x
Bend4		x
Bend6	x
Bet1		x	x	x
Bet1l		x
Bhlhe40		x
Bhlhe41	x
Bhmt	x	x	x	x
Blcap		x	x	x
Bloc1s1		x
Bmf			x	x
Bmi1		x
Bmp2		x
Bmp3		x
Bmpr1b		x
Bmpr2		x
Bnip3l		x	x	x
Bod1			x	x
Boll		x
Bpifb4	x
Brd3		x
Bri3bp	x		x	x
Brix1	x	x
Brk1	x
Brp16			x	x
Brunol5				x
Brunol6				x
Brwd1		x
Bsn				x
Bsnd		x
Btaf1	x
Btbd9		x
Btg1	x	x		x
Btrc			x	x
Bud31	x	x		x
Bves		x
Bxdc2			x	x
Bysl		x
C10orf10		x
C10orf105		x
C10orf118		x
C10orf2		x
C10orf53		x
C10orf54		x
C10orf71		x
C10orf90		x
C11orf45		x
C11orf57		x
C11orf70		x
C11orf83		x
C12orf43		x
C12orf49		x
C12orf50		x
C12orf75		x
C14orf105		x
C14orf166		x
C14orf180		x
C14orf28		x
C15orf39		x
C15orf40		x
C15orf56		x
C16orf11		x
C16orf46		x
C16orf47		x
C16orf74		x
C16orf89		x
C17orf103		x
C17orf107		x
C17orf82		x
C17orf85		x
C19orf12		x
C19orf66		x
C1orf115		x
C1orf147		x
C1orf173		x
C1orf226		x
C1orf27		x
C1orf50		x
C1orf95		x
C1qtnf5			x	x
C1qtnf6			x
C1qtnf7				x
C1qtnf8		x
C1qtnf9	x
C1rl		x
C20orf112		x
C20orf165			x	x
C20orf194		x
C21orf59		x
C21orf88		x
C22orf23		x
C22orf39		x
C2cd2		x
C2cd2l		x	x	x
C2orf68		x
C3orf36		x
C3orf70		x
C3orf72		x
C4orf32		x
C5orf20		x
C5orf63		x
C6orf141		x
C6orf223		x
C6orf47		x
C6orf89		x
C7orf26		x
C7orf50		x
C7orf55-Luc7l2		x
C8b	x	x		x
C8orf4		x
C9		x
C9orf114		x
C9orf117		x
C9orf40		x
C9orf85		x
Ca12		x
Ca13		x
Ca5b		x
Cables1		x
Cabp7	x	x	x	x
Cachd1	x	x
Cacna1a		x
Cacna1b	x	x	x	x
Cacna1d		x
Cacna1e		x
Cacna1s	x	x
Cacna2d1		x
Cacng3		x
Cacng8		x
Cactin	x	x
Cacul1		x
Cacybp	x		x	x
Cadm1		x
Cadm2		x
Cadm3				x
Cadm4		x
Calb2	x	x	x	x
Calcoco1		x	x
Calcrl		x
Calml3	x		x	x
Calml4		x
Caln1		x
Caly	x		x	x
Camk2a		x
Camk2b	x	x
Camk2n1		x
Camk4			x
Camkk2		x
Camsap1	x	x
Cap1			x
Capn14		x
Capn15	x
Capn5		x	x	x
Capn6			x	x
Capn7		x
Capn8			x
Caprin1	x	x
Car13				x
Card10		x
Card11		x
Card14		x
Carkd				x
Carm1			x
Casp2			x
Casp3	x	x	x	x
Casp7	x	x	x	x
Casp9	x	x		x
Casq2	x	x	x	x
Catsperg1				x
Cav3	x	x	x	x
Cbfa2t2	x	x
Cbln1				x
Cbln3				x
Cbx4	x	x
Cbx5		x
Cbx7	x	x	x	x
Ccar2		x
Ccbe1		x
Ccbp2			x
Ccdc109b		x
Ccdc113		x
Ccdc117		x
Ccdc134	x	x	x	x
Ccdc135				x
Ccdc138	x	x
Ccdc14		x
Ccdc140		x
Ccdc17			x
Ccdc176		x
Ccdc25	x	x		x
Ccdc58		x
Ccdc75				x
Ccdc82		x	x	x
Ccdc85c		x
Ccdc88a	x	x
Ccdc93		x
Ccdc97		x		x
Cckbr			x
Ccl24	x	x	x	x
Ccl25			x	x
Ccl5	x		x	x
Ccm2l		x
Ccna1	x	x	x	x
Ccnc	x
Ccnd1		x		x
Ccnd3	x	x
Ccndbp1		x
Ccne1	x	x		x
Ccni2		x
Ccnjl	x	x	x	x
Ccnk		x
Ccnl2		x
Ccr5	x		x	x
Ccr9	x	x	x	x
Ccsap		x
Cct3		x	x	x
Ccz1	x
Cd177		x
Cd209a				x
Cd27			x	x
Cd2bp2	x			x
Cd302		x	x	x
Cd44	x	x		x
Cd5			x	x
Cd59		x
Cd6			x
Cd84		x
Cd8a		x
Cd99l2		x	x	x
Cdc14a		x		x
Cdc16		x		x
Cdc25a	x	x	x	x
Cdc25b	x			x
Cdc26	x		x	x
Cdc42bpa		x
Cdc42ep1				x
Cdc42ep4	x	x		x
Cdc42se2	x	x		x
Cdc5l		x
Cdca2	x			x
Cdca4		x	x
Cdcp2		x
Cdh1			x	x
Cdh11		x
Cdh13			x	x
Cdh2			x
Cdh22	x
Cdhr3		x
Cdk10	x	x	x	x
Cdk12		x
Cdk17	x
Cdk5	x		x	x
Cdk5rap3	x	x
Cdk6		x
Cdkl1		x
Cdkn1c	x	x	x
Cdkn2aipnl			x	x
Cdkn2d	x
Cdon		x
Cdr2l		x
Cds2		x
Cdx2	x
Cdyl	x	x	x	x
Cdyl2		x
Ceacam1	x	x
Cebpg		x		x
Cecr2		x
Celf2		x
Celf5	x
Celf6		x
Celsr1		x
Celsr2		x
Celsr3	x	x	x
Cemp1		x
Cenpbd1		x
Cenpm	x	x		x
Cep128		x
Cep170b		x
Cep350	x
Cep41	x	x
Cep57		x
Cep68		x
Cercam			x	x
Cerk	x			x
Cers1	x	x
Cers3	x
Cers5	x
Cers6	x
Cfl1	x	x	x
Cfp				x
Cggbp1		x		x
Chadl	x	x
Chchd3		x
Chchd5		x
Chchd8				x
Chd6	x	x
Chdh			x	x
Chic1		x
Chic2		x
Chm		x
Chmp1b	x	x
Chp			x	x
Chrdl1			x
Chrm2		x
Chrm3		x
Chrna4		x
Chrnb2		x
Chrnb3			x
Chrnb4		x
Chst10		x	x	x
Chst11		x
Chst14	x	x
Chst15			x
Chst3		x
Chsy1		x
Chtop	x
Churc1		x
Churc1-Fntb		x
Ciapin1		x
Ciita		x	x	x
Cinp		x
Cir1		x
Cisd2		x
Cit		x
Ciz1		x
Ckap2l		x
Ckap4	x	x		x
Clasp2		x	x	x
Clcn2		x	x	x
Clcn3		x
Clcn4	x
Clcn4-2			x	x
Clcn5		x
Clcn6		x
Cldn1		x	x	x
Cldn11			x	x
Cldn12	x	x		x
Cldn17	x
Cldn19	x		x
Cldn4	x		x	x
Cldn8			x
Cldnd1			x	x
Clec16a	x	x
Clec1a	x	x		x
Clec4a1				x
Clec5a				x
Clec9a				x
Clic3			x
Clic4		x
Clic5	x	x	x	x
Clip1	x	x	x	x
Clip2	x	x	x	x
Clip4		x
Clmn		x
Clmp	x	x
Cln5	x	x
Clns1a	x	x	x	x
Clock		x
Clpp		x
Clspn	x	x		x
Clstn1	x	x		x
Clstn2		x
Cltcl1		x
Clvs1	x	x
Cmbl	x		x	x
Cmc1		x
Cmklr1	x	x	x	x
Cml1	x		x	x
Cmpk1		x
Cmtm3	x	x		x
Cmtm4	x	x
Cmtm6			x	x
Cmtr1	x	x
Cndp1		x	x	x
Cnga4	x	x		x
Cnih1		x
Cnnm2		x
Cnot6l		x
Cnot7	x			x
Cnot8	x	x	x	x
Cnpy2	x	x		x
Cnr1				x
Cnr2	x
Cntn2	x	x	x	x
Cntn5		x
Cntnap2		x
Coa4		x
Cobl				x
Cobll1	x
Col12a1		x
Col14a1		x
Col1a1	x	x
Col23a1			x	x
Col4a1	x	x		x
Col4a2	x
Col4a4		x
Col8a2	x	x
Col9a2	x			x
Colec11	x
Commd3-Bmi1		x
Copz2		x
Coq10b	x	x	x	x
Coq5		x	x	x
Coq6			x
Coro1b			x
Coro1c				x
Coro7	x	x		x
Cotl1	x	x		x
Cox11		x		x
Cox17		x
Cox19	x
Cox6c		x
Cpd		x
Cpe		x
Cpeb3		x
Cpeb4		x
Cpg1	x		x
Cplx3	x	x		x
Cpm	x	x		x
Cpn2				x
Cpped1			x	x
Cpsf2		x
Cpsf4	x	x	x	x
Cpsf7	x	x	x
CPSF7_RAT				x
Cpt1a			x	x
Cpt1b	x		x	x
Cpz			x
Cramp1l		x
Crcp			x
Creb1		x
Creb3l1	x	x	x	x
Creb3l2		x	x	x
Crebzf				x
Creg1	x	x		x
Creld1		x
Crem	x
Crhbp			x
Crim1		x
Crispld2	x	x		x
Crkl		x
Crkrs			x
Crp		x
Crtac1		x
Crtam				x
Crtc1		x
Cryaa	x	x
Crygs		x
Cryz	x	x	x
Cs		x
Csad		x	x	x
Csda			x	x
Csdc2				x
Csde1			x
Csf1	x	x		x
Csf2rb	x			x
Csmd3	x	x
Csnk1e			x
Csrnp2				x
Csrnp3		x
Cst12			x	x
Cst6			x	x
Cst9		x
Cstf1	x	x	x	x
Ctc-349c3.1		x
Ctd-2207o23.12		x
Ctdspl				x
Ctdspl2		x
Ctif		x
Ctnna2		x
Ctnnal1				x
Ctnnbip1	x	x		x
Ctrl		x
Ctse			x
Ctsf			x	x
Ctsg	x			x
Ctsh	x	x	x	x
Ctsll3				x
Cttn	x	x	x	x
Cttnbp2		x
Cttnbp2nl		x		x
Ctxn2	x			x
Cul1	x	x		x
Cul2		x		x
Cux1	x			x
Cwf19l2	x			x
Cxcl12	x		x
Cxcl13			x	x
Cxcr1		x
Cxcr5		x
Cxorf23		x
Cxorf38		x
Cxxc1	x
Cyb561a3	x	x
Cyb5r1		x
Cyb5r4		x
Cyb5rl		x
Cybasc3			x	x
Cybb		x
Cybrd1	x		x	x
Cyfip2		x
Cygb		x	x	x
Cyhr1			x
Cyp11b1	x	x	x	x
Cyp1a1	x	x	x	x
Cyp1b1		x
Cyp21a1	x			x
Cyp24a1			x	x
Cyp26b1		x	x	x
Cyp2a2	x		x	x
Cyp2b6		x
Cyp2d4			x	x
Cyp2j4			x	x
Cyp46a1	x			x
Cyp4a2	x			x
Cyp4a3	x
Cyp4a8	x		x	x
Cyp4f18			x	x
Cyp4f4			x	x
Cyp4v3	x			x
Cyp8b1	x		x	x
Cys1	x
Cysltr1		x
Cyss				x
Cyth2			x
Cyth4	x	x		x
Cytsa				x
Cyyr1	x		x
D2hgdh	x			x
D3Z800_RAT				x
D3Z893_RAT				x
D3Z8C3_RAT				x
D3Z8P4_RAT				x
D3Z8W2_RAT				x
D3Z953_RAT				x
D3Z9J7_RAT				x
D3Z9L4_RAT				x
D3Z9S5_RAT				x
D3ZA12_RAT				x
D3ZAX5_RAT				x
D3ZCC3_RAT				x
D3ZDP4_RAT				x
D3ZDU2_RAT				x
D3ZDX5_RAT				x
D3ZE52_RAT				x
D3ZEA8_RAT				x
D3ZEL4_RAT				x
D3ZF29_RAT				x
D3ZGB8_RAT				x
D3ZGE9_RAT				x
D3ZHQ1_RAT				x
D3ZJC6_RAT				x
D3ZM92_RAT				x
D3ZMH5_RAT				x
D3ZMJ6_RAT				x
D3ZN52_RAT				x
D3ZN89_RAT				x
D3ZNK2_RAT				x
D3ZP61_RAT				x
D3ZP74_RAT				x
D3ZR90_RAT				x
D3ZRH9_RAT				x
D3ZT25_RAT				x
D3ZT96_RAT				x
D3ZTQ1_RAT				x
D3ZU90_RAT				x
D3ZU94_RAT				x
D3ZUH8_RAT				x
D3ZUN0_RAT				x
D3ZWH7_RAT				x
D3ZX51_RAT				x
D3ZX84_RAT				x
D3ZX91_RAT				x
D3ZXL0_RAT				x
D3ZYL2_RAT				x
D3ZYR3_RAT				x
D3ZZ51_RAT				x
D4A045_RAT				x
D4A065_RAT				x
D4A0K3_RAT				x
D4A1J6_RAT				x
D4A268_RAT				x
D4A3Y9_RAT				x
D4A440_RAT				x
D4A4A8_RAT				x
D4A4J3_RAT				x
D4A8P9_RAT				x
D4A932_RAT				x
D4A966_RAT				x
D4AAV5_RAT				x
D4ABI4_RAT				x
D4ABY6_RAT				x
D4AC30_RAT				x
D4AC69_RAT				x
D4ACL6_RAT				x
D4ACN5_RAT				x
D4AD75_RAT				x
D4ADE8_RAT				x
D4ADT8_RAT				x
D4ADU9_RAT				x
D4ADX4_RAT				x
D4ADZ1_RAT				x
D4AEF0_RAT				x
Daam2		x
Dab2ip			x	x
Dach1		x
Dact3		x
Dak	x		x	x
Dap	x	x	x	x
Dapp1	x	x		x
Dbnl	x	x	x	x
Dcaf12l2		x
Dcaf4		x
Dcaf7		x
Dcaf8		x
Dcbld2		x
Dcdc2				x
Dchs1	x	x		x
Dclk1		x	x
Dcp1a		x
Dcp1b	x
Dctd	x	x	x
DCTD_RAT				x
Dcun1d2	x	x		x
Dcun1d4	x	x		x
Dcx	x	x		x
Dda1	x			x
Ddah1	x	x
Ddb2		x
Ddc	x		x
Ddi2		x	x	x
Ddit4l		x
Ddn	x	x		x
Ddx21			x	x
Ddx3	x
Ddx31		x
Ddx39a		x
Ddx3x	x
Ddx4	x
Ddx41	x	x		x
Ddx46		x
Ddx54		x
Ddx56		x
Ddx58				x
Dek		x	x	x
Dennd1a	x	x
Dennd5a	x			x
Dennd6a	x	x
Depdc5	x	x		x
Deptor		x
Derl1	x	x	x	x
Derl2		x
Desi2		x
Dexi				x
Dffb				x
Dfna5	x
Dgcr14		x
Dgcr2		x
Dgka				x
Dgke	x	x
Dgkg	x
Dgkh		x
Dhcr7			x	x
Dhdds		x
Dhps			x	x
Dhrs7b		x
Dhx33		x
Dhx35	x	x		x
Diaph1	x	x
Dicer1		x
Dio1		x	x	x
Dio2		x
Dip2a		x
Dip2c		x
Diras1	x	x		x
Disc1		x
Disp2	x
Dixdc1			x
Dkfzp434h0512		x
Dkfzp761j1410		x
Dkk3	x		x	x
Dlat	x		x	x
Dleu1		x
Dlg2		x
Dlg3		x
Dlgap4		x
Dlk2	x	x		x
Dlst	x		x	x
Dmbx1	x			x
Dmgdh		x
Dmkn		x		x
Dmp1	x		x	x
Dmrt2		x
Dmrta1	x	x		x
Dmtn	x	x
Dmxl2		x
Dnah10os		x
Dnah17-As1		x
Dnaja3	x
Dnajb11		x	x	x
Dnajb4		x
Dnajb7		x
Dnajc16		x
Dnajc3		x
Dnajc5		x
Dnajc5g	x	x	x	x
Dnal1		x		x
Dnal4		x	x
Dnali1			x	x
Dnase1l2	x
Dnm1	x	x
Dnm1l			x
Dnm2			x
Dnmt3a		x
Dock6	x	x		x
Dock7		x
Dock9	x			x
Dok6		x
Dot1l	x	x
Dpep3			x
Dph2	x	x	x	x
Dph3	x
Dpp4	x
Dpp6		x
Dpp8	x	x
Dpy19l1	x	x
Dpy19l3	x			x
Dpy19l4		x
Dr1			x	x
Draxin		x
Drd2			x	x
Dscam		x
Dscr3	x	x
Dscr6				x
Dsg1	x	x
Dst		x
Dstn	x		x	x
Dstnl1	x
Dstyk				x
Dtl		x
Dtna		x
Dtx1	x	x
Dtx4		x
Duox1				x
Duoxa1		x		x
Dus4l	x
Dusp13	x	x	x	x
Dusp14	x	x
Dusp14l1	x
Dusp15	x
Dusp16		x
Dusp5			x
Dusp6	x	x		x
Dusp8		x
Dvl2	x	x
Dync1li2	x	x	x	x
Dync2h1	x	x
Dync2li1			x
Dynll2		x
Dynlt1	x	x	x	x
Dyrk2		x
Dyrk3	x			x
Dyt1			x	x
Dzip3	x
E2f1		x		x
E2f2		x
E2f5		x		x
E2f7	x	x
E9PSK5_RAT				x
E9PTV7_RAT				x
Ebf1		x
Ecel1	x
Echs1			x	x
Eda2r		x
Edc4		x	x
Eddm3b	x
Edem1	x	x
Edf1	x	x		x
Edil3		x
Edn1			x	x
Eea1	x			x
Eef1e1				x
Eef2			x
Efcab14		x
Efcab2	x			x
Efha1				x
Efhc2		x		x
Efhd2	x	x		x
Efna1			x	x
Efna2		x
Efnb1			x
Efnb3	x	x		x
Efr3a		x		x
Efr3b		x
Egfem1	x
Egflam	x
Egfr			x	x
Egr1		x	x	x
Egr3		x	x
Ehd2		x
Ehd3		x
Ehd4			x	x
Ehf		x
Ehmt1	x	x		x
Eid1	x	x		x
Eif2b1			x
Eif2b2	x		x	x
Eif2c4				x
Eif2s1		x
Eif2s3x	x			x
Eif3d			x
Eif3j		x		x
Eif4a3		x
Eif4b	x		x	x
Eif4e2				x
Eif4e3				x
Eif4ebp1			x	x
Eif4ebp2	x	x	x	x
Eif4g2	x
Eif5			x	x
Eif5a			x
Elac1				x
Elavl1		x
Elf2		x	x	x
Elfn2		x
Elk1		x
Elk3	x			x
Elk4	x	x		x
Ell2		x		x
Elmo1	x			x
Elmo2				x
Elmod2		x		x
Elmod3		x	x
Elmsan1		x
Elof1	x	x		x
Elovl2				x
Elovl3	x	x		x
Eltd1				x
Emb	x	x	x	x
Eme1		x
Emid1	x			x
Eml5		x
Emp1	x	x	x	x
Emp2	x		x	x
En2		x		x
Enc1	x	x
Endod1		x
Endov		x
Eng		x
Engase	x			x
Enkd1	x	x
Enpp4				x
Enpp5		x
ENSRNOT00000057627				x
ENSRNOT00000059911				x
Entpd3			x	x
Entpd5		x
Entpd7		x
Eny2	x			x
Epas1		x
Epb4.1	x			x
Epb4.1l1			x
Epb41		x
Epb49				x
Epg5	x	x
Epha3			x
Epha4	x	x
Epha8	x	x
Ephb1				x
Epm2aip1		x
Epo	x		x	x
Eps8l1	x			x
Eps8l2	x	x		x
Erap1			x
Erbb2			x
Erbb2ip		x
Erbb4		x
Erc1	x	x	x
Eri1	x	x
Ermap		x
Erp44		x
Errfi1			x	x
Esco1		x
Esrp2	x	x		x
Esrrg	x		x	x
Esyt3		x
Ethe1	x	x		x
Ets2	x	x
Etv6			x
Eva1a	x	x
Evi5l	x
Exd1	x			x
Exo1	x	x		x
Exoc5		x
Exoc6b	x			x
Exosc6		x
Ext1		x
Ext2		x
Extl1		x		x
Eya2		x
Eya3	x	x		x
Ezh2	x	x		x
F10		x
F1LMD2_RAT				x
F1LN59_RAT				x
F1LQT6_RAT				x
F1LRS6_RAT				x
F1LTA2_RAT				x
F1LTK4_RAT				x
F1LUA2_RAT				x
F1LUL1_RAT				x
F1LVK3_RAT				x
F1LVV6_RAT				x
F1LWE0_RAT				x
F1LWM0_RAT				x
F1LWM1_RAT				x
F1LWX5_RAT				x
F1LX73_RAT				x
F1LZ56_RAT				x
F1LZX0_RAT				x
F1M0L3_RAT				x
F1M124_RAT				x
F1M244_RAT				x
F1M2I7_RAT				x
F1M3R2_RAT				x
F1M4N6_RAT				x
F1M4U0_RAT				x
F1M4U5_RAT				x
F1M5S2_RAT				x
F1M7D3_RAT				x
F1M7W8_RAT				x
F1M807_RAT				x
F1M8H5_RAT				x
F1M8N9_RAT				x
F1M9R3_RAT				x
F1MAC7_RAT				x
F1MAG0_RAT				x
F1MAG3_RAT				x
F1MAG5_RAT				x
F1MAH5_RAT				x
F1MAM3_RAT				x
F1MAS4_RAT				x
F2r	x	x		x
F2rl2	x	x	x	x
F8	x			x
F9	x
Fa2h	x			x
Faah			x
Fabp3	x	x	x	x
Fadd			x	x
Fads1			x	x
Faf1	x	x	x
Fahd2a		x
Faim3		x
Fam101b		x
Fam102a	x	x
Fam105b		x
Fam107b		x	x	x
Fam110a		x	x
Fam116a				x
Fam117b	x	x		x
Fam118a				x
Fam122a		x
Fam124a		x
Fam124b		x
Fam125a			x	x
Fam126a		x
Fam126b		x
Fam129a		x
Fam12b			x
Fam132b		x
Fam134a		x
Fam134c	x	x		x
Fam136a		x
Fam13b	x	x
Fam13b1				x
Fam149b1	x	x	x	x
Fam160b1	x
Fam161a				x
Fam163a	x	x		x
Fam167a	x			x
Fam168a	x	x		x
Fam168b		x
Fam169a		x
Fam172a	x	x		x
Fam175b	x	x		x
Fam176a				x
Fam178a		x
Fam184b		x
Fam186b		x
Fam188a		x
Fam189a2	x			x
Fam189b				x
Fam192a		x
Fam196b		x
Fam198b	x		x	x
Fam19a1		x
Fam203a		x
Fam203b		x
Fam204a		x
Fam206a	x
Fam20c	x	x		x
Fam210a	x
Fam210b		x
Fam211a	x	x
Fam212b		x
Fam213b		x
Fam216b		x
Fam219b		x
Fam222b		x
Fam3d				x
Fam46a	x			x
Fam46d		x
Fam48a			x	x
Fam49b		x
Fam53b				x
Fam53c		x
Fam5c			x
Fam69a		x		x
Fam69c		x
Fam71b	x	x	x	x
Fam71f1		x	x	x
Fam73b				x
Fam78a	x	x
Fam81a		x
Fam83f		x
Fam84a		x		x
Fam86a		x
Fam96b	x	x
Fam98a		x
Fam98b		x
Fanca	x	x		x
Fat2		x	x	x
Fat4	x	x
Faxdc2	x
Fbln5		x	x
Fbln7	x
Fbn1		x
Fbn2		x
Fbrsl1		x
FBX17_RAT				x
Fbxl12		x
Fbxl4	x
Fbxl7	x	x		x
Fbxo10	x	x
Fbxo17	x		x
Fbxo2			x
Fbxo21	x	x		x
Fbxo32		x
Fbxo33	x			x
Fbxo41	x	x
Fbxo42		x
Fbxo46		x		x
Fbxw10	x
Fbxw8	x
Fcf1	x
Fcn1		x
Fcnb			x	x
Fcrl1		x
Fcrl2	x
Fcrls				x
Fdxr		x
Fem1c	x	x		x
Fen1		x
Fer		x
Fermt2	x	x	x	x
Fezf2		x		x
Ffar4		x
Fgd4		x
Fgf1		x	x	x
Fgf5		x
Fgfr1			x
Fgfr1op2		x
Fgfrl1		x	x	x
Fhl2		x
Fhl5		x
Fhod1		x		x
Ficd	x		x
Fig4		x
Fign		x
Fitm2	x	x		x
Fkbp14		x
Fkbp15		x
Fkbp5	x	x	x	x
Fkrp			x	x
Flcn			x	x
Flnb		x
Flrt1	x
Fmn1		x
Fmnl3	x	x
Fmo2	x	x	x	x
Fmod	x		x	x
Fn3krp	x
Fnbp1l		x
Fndc3b		x
Fndc8	x	x		x
Fnip2		x
Fntb		x	x	x
Fosl1		x	x	x
Fosl2		x
Foxc1		x
Foxd1		x
Foxd3		x
Foxd4		x
Foxd4l1		x
Foxd4l2		x
Foxd4l3		x
Foxd4l4		x
Foxd4l5		x
Foxd4l6		x
Foxi1	x	x		x
Foxk1		x
Foxn4		x		x
Foxp1		x
Foxp3	x			x
Foxp4	x	x
Fpgs	x	x
Fpgt			x
Frat1		x
Frat2		x
Frem2		x
Frmd4a		x
Frmd5		x
Frmd8			x	x
Frmpd3		x
Frmpd4		x
Frrs1		x
Frrs1l		x
Frs2				x
Frs3	x	x	x	x
Fsd1		x
Fshb				x
Fstl1		x
Fstl4		x
Fth1		x
Fto		x
Ftsjd2			x
Fuk	x			x
Fuom	x
Furin		x	x	x
Fut1	x		x	x
Fut2	x		x	x
Fut4	x	x	x
Fut9		x
Fuz			x
Fyco1	x	x		x
Fyttd1		x
Fzd10		x
Fzd4	x	x
Fzd5		x
G4	x		x	x
G6pd	x	x		x
G7c			x	x
Gab2		x
Gab4		x
Gabbr1			x
Gabbr2	x	x		x
Gabpa	x			x
Gabra2		x
Gabra4		x
Gabrb1	x	x	x	x
Gabrd			x	x
Gabrq		x
Gabrr1				x
Gadd45g		x		x
Gadl1	x
Galc		x
Galm	x		x	x
Galnt1				x
Galnt10		x
Galnt13		x
Galnt14		x	x	x
Galnt16	x	x
Galnt18	x	x
Galnt2	x	x		x
Galntl1				x
Galntl6		x
Gan		x
Ganc				x
Gart				x
Gas7	x	x
Gata1	x		x	x
Gata5			x	x
Gatad2a	x	x	x	x
Gatad2b		x
Gatc	x	x		x
Gatsl2	x	x
Gbx2	x	x
Gca				x
Gcc2		x		x
Gch1		x
Gclm		x
Gcnt1	x		x
Gcnt4		x
Gcom1	x		x	x
Gcsh			x	x
Gdap2		x	x
Gdf11		x
Gdf7		x
Gdnf		x
Gdpd2	x	x		x
Gfra1		x	x
Gfra2	x	x		x
Gga1			x	x
Ggact		x
Ggcx		x	x	x
Ggps1	x		x	x
Ghdc	x
Ghr			x
Gid4		x
Gigyf1	x
Gimap6			x
Gimap7	x		x	x
Gimap9			x	x
Gins2	x	x		x
Gins3				x
Git1	x	x		x
Git2		x
Giyd2			x	x
Gja3		x
Gja4			x	x
Gja5	x	x	x	x
Gjb2		x	x	x
Gk5		x
Gkap1		x	x	x
Glcci1		x
Gldn		x
Glg1		x	x	x
Gli2		x		x
Gli3		x
Glipr1l2		x
Glis2	x			x
Glis3		x
Glp2r		x
Glra1			x
Glt8d1	x	x		x
Glt8d3				x
Gltp				x
Gltscr1l		x
Glud1	x		x	x
Glul	x
Glyr1		x
Gmppa	x		x	x
Gmppb		x
Gmpr			x	x
Gmpr2	x		x
Gmps		x
Gna12	x	x	x	x
Gnai2	x	x	x	x
Gnal		x
Gnao1			x
Gnas	x
Gnat1	x	x		x
Gnaz		x	x
Gnb1l		x
Gnb3		x	x	x
Gng12		x
Gng2	x	x
Gng4		x
Gnl1		x
Gnpda1		x
Gnptab		x
Gnrhr	x	x	x	x
Gns		x
Golga7			x	x
Golga7b	x	x
Golgb1		x
Golph3l		x
Golt1a				x
Gorasp1	x	x		x
Gosr1	x	x	x	x
Gosr2	x	x	x	x
Got2			x	x
Gpam		x
Gpatch11	x
Gpatch2l	x
Gpatch4		x
Gpatch8		x
Gpcpd1				x
Gpd1l		x
Gpd2		x
Gpha2			x	x
Gphn		x		x
Gpihbp1	x	x		x
Gpld1		x
Gpm6b			x
Gpr107	x			x
Gpr113		x
Gpr120				x
Gpr124		x
Gpr126		x
Gpr133		x
Gpr135		x
Gpr15		x
Gpr153		x
Gpr160		x
Gpr174		x		x
Gpr18		x		x
Gpr183	x			x
Gpr20		x
Gpr22	x	x		x
Gpr26		x
Gpr3		x
Gpr50		x
Gpr63		x
Gpr75		x		x
Gpr88			x	x
Gprc5b		x
Gprin2		x
Gprin3		x
Gpsm1			x
Gpx3	x	x
Gpx6	x
Gramd3	x		x
Gramd4		x
Grap	x		x	x
Grapl		x
Grb10	x	x		x
Grem1	x	x	x
GREM1_RAT				x
Grhl2	x			x
Grhpr		x
Gria3	x		x	x
Grid1		x		x
Grik1-As2		x
Grik3		x
Grik4		x
Grin1	x		x	x
Grin2a		x
Grin2b		x
Grip2	x		x	x
Grk5	x		x	x
Grk6		x
Grm1	x
Grm2	x			x
Grm4		x
Grm5		x
Grsf1	x
Gsk3a	x
Gsk3b		x	x	x
Gspt1		x
Gstm7	x		x	x
Gsto1		x
Gsto2		x
Gstt1	x	x
Gtdc1		x
Gtf3c3				x
Gtf3c4		x		x
Gtf3c5		x
Gtlf3b	x			x
Gtpbp1	x	x
Gucy2e	x		x	x
Guf1	x			x
Gulp1	x		x	x
Gxylt1	x	x
Gyg1	x		x	x
Gypa		x
Gypc	x		x	x
Gys1	x			x
Gzmf			x	x
H1f0	x		x	x
H2afx		x		x
H3f3b	x	x	x	x
H6pd		x
Habp2			x	x
Haghl		x	x
Hand2		x
Hapln4		x		x
Haus1			x	x
Hbegf	x	x		x
Hbz	x
Hcfc1	x	x
Hcfc1r1		x		x
Hcn4		x
Hdac1			x	x
Hdac4		x
Hdac5		x
Hddc3		x
Hdgfrp3	x	x		x
Heatr1		x		x
Heatr2	x			x
Heatr5a				x
Hebp2		x
Heca	x			x
Hectd2		x
Hecw2		x
Hephl1		x
Herpud2		x
Hes6			x	x
Heyl	x	x		x
Hhipl1		x
Hif1a		x		x
Hif1an		x
Hif3a	x	x	x	x
Higd1a		x
Hip1		x		x
Hipk1		x		x
Hipk3		x
Hira	x	x
Hisppd2a				x
Hist1h2ac	x
Hist1h4b	x		x	x
Hist2h2be	x	x
Hist2h2bf		x
Hk1	x	x
Hla-Dma		x
Hla-Dqb2		x
Hm13		x
Hmces		x
Hmga1		x
Hmgcl			x	x
Hmgcr		x
Hmox1		x	x	x
Hmx1		x
Hnf1a		x	x	x
Hnf1b		x
Hnrnpa3	x
Hnrnpk			x
Hnrpdl			x
Hook3		x
Hoxa13		x
Hoxb3		x
Hoxb9		x
Hoxc12		x
Hoxc8		x
Hoxd1				x
Hoxd12		x
Hpcal1	x		x	x
Hpcal4		x
Hpgd		x
Hr	x	x		x
Hrasls5		x	x	x
Hrk	x
Hrnbp3				x
Hs1bp3	x	x
Hs2st1	x	x		x
Hs3st1		x
Hs3st3a1		x
Hs6st1	x	x		x
Hs6st3		x
Hsd17b12		x	x	x
Hspa12a		x		x
Hspa1b	x		x
Hspa4		x	x	x
Hspa4l	x	x		x
Hspb1	x	x	x	x
Hspb7		x		x
Hspbap1		x
Hspc159				x
Htatip2	x			x
Htr2a				x
Htr5a			x	x
Hvcn1	x	x
Iars		x
Ica1l		x
Icam1	x	x	x	x
Id2			x
Id4	x	x	x	x
Ide	x	x	x	x
Ido2		x
Ids	x
Ier2			x	x
Ier5l		x
Iffo1	x
Ifi30			x	x
Ifit2			x	x
Ifitm5	x	x		x
Ifltd1		x
Ifnlr1		x
Igf1		x
Igf2			x	x
Igf2bp3	x
Igfbp2	x	x	x	x
Igfbp5		x		x
Igfbp7			x
Igfn1		x
Iglon5	x	x
Igsf11			x	x
Igsf6		x	x	x
Ikbkap			x
Ikbkb	x	x	x	x
Ikbke		x		x
Ikbkg		x
Ikzf1		x
Ikzf3	x			x
Il10ra		x
Il16		x		x
Il17re				x
Il1a				x
Il1f5				x
Il1rap		x
Il20ra		x
Il20rb		x
Il21r		x
Il2rb		x
Il2rg			x
Il33	x		x	x
Il34			x	x
Il36rn	x	x
Il5ra		x
Il6r	x	x		x
Il6ra			x
Il6st	x	x
Il9r	x		x
Ildr2		x
Imp4	x		x
Impa1		x	x	x
Impact	x	x
Impg1		x
Ina	x	x	x	x
Incenp		x
Ing1		x
Ing5		x		x
Inhbb	x	x
Inhbe			x	x
Ino80	x	x
Inpp4b		x
Inpp5d		x	x	x
Ins-Igf2		x
Insl3			x
Insr		x
Ints10	x	x		x
Invs	x	x
Ip6k1		x	x
Ip6k2		x
Ipcef1		x
Ipmk	x	x	x	x
Ipo13		x
Ipo5	x
Ipo9		x
Iqck	x
Iqgap3		x
Iqsec1		x
Iqsec2		x
Irak3	x			x
Irak4	x			x
Ireb2			x
Irf1			x	x
Irf4	x			x
Irgc	x	x
Irgc1			x	x
Irgq	x			x
Isca1	x		x	x
Isy1		x
Itga2		x
Itga5	x	x		x
Itga6		x
Itga7			x
Itga8	x	x
Itga9	x	x		x
Itgal	x		x	x
Itgb1			x
Itgb6		x
Itk	x	x		x
Itpkb	x		x
Itpkc	x	x	x	x
Itpr2	x	x
ITPR2_RAT				x
Iws1		x
Iyd		x
Jam2	x			x
Jarid2	x	x
Jazf1	x	x
Jdp2		x
Jmjd1c	x	x
Jmjd7-Pla2g4b		x
Jmjd8	x	x	x	x
Josd1	x	x	x	x
Jph3				x
Jrk	x			x
Jsrp1	x	x		x
Jub			x	x
Jund				x
KAD2_RAT				x
Kank1		x		x
Kank2	x	x
Kat6a	x	x
Kat6b		x
Katnal1		x
Katnb1		x
Kazn	x
Kbtbd4		x
Kcmf1		x
Kcna5		x
Kcnab1			x	x
Kcnc1	x	x		x
Kcnd1	x
Kcne1		x	x
Kcnh1		x
Kcnh2		x	x	x
Kcnh5		x
Kcnj10		x
Kcnj12	x		x	x
Kcnj3			x
Kcnj6	x	x
[truncated: 2,885 more rows]
