# Supplementary material for: MicroRNA-138-5p Targets Pro-Apoptotic Factors and Favors Neural Cell Survival: Analysis in the Injured Spinal Cord
Source: Biomedicines. 2022 Jun 30;10(7):1559. doi: 10.3390/biomedicines10071559 (PMC9312482; doi:10.3390/biomedicines10071559)
Supplement: Supplementary file 1 [file biomedicines-10-01559-s001.zip › Table S3. M. Maza and Barreda-Manso et al..xls]

## Sheet: S3. SCI dysregulated genes
Article title: MicroRNA-138-5p targets pro-apoptotic factors and favours neural cell survival: analysis in the injured spinal cord
Authors: Rodrigo M Maza, M. Asunción Barreda-Manso, David Reigada, Agata Silván, Teresa Muñoz-Galdeano, Altea Soto, Ángela del Águila, Manuel Nieto-Diaz
Supplementary Table S3. Gene list of miR-138-5p targets dysregulated during the firts week after SCI. List of genes that become dysregulated in the spinal cord during the first week after injury in rat models according to high throughout gene expression data stored in the GEO datasets GSE464 (1, 3 and 7 dpi) and GSE69334 (3 and 10 dpi).
GSE464 CTRvs1dpo	GSE464 CTRvs3dpo	GSE464 CTRvs7dpo	GSE69334 CTRvs3dpo	GSE69334 CTRvs10dpo	Combination of all genes dysregulated after SCI (GSE464 plus GSE69334)
Aanat	A2m		A3galt2	A3galt2	A2m
Aatf	AA926063	Aacs	AA926063	AA926063	A3galt2
Abat	Aacs	Aadat	Aaas	Aaas	AA926063
Abca1	Aadat	Aak1	Aacs	Aacs	Aaas
Abca2	Aak1	Abca1	Aadat	Aadat	Aacs
Abcc3	Aanat	Abca7	Aaed1	Aaed1	Aadat
Abcc8	Aard	Abcb10	Aak1	Aak1	Aaed1
Abcd2	Aatk	Abcc4	Aard	Aar2	Aagab
Abcf1	Abat	Abcd1	Aars	Aars	Aak1
Abcg1	Abca1	Abcd2	Aarsd1	Aarsd1	Aanat
Abhd11	Abca2	Abcf1	Aasdh	Aasdhppt	Aar2
Abhd13	Abca7	Abcg1	Aasdhppt	Aass	Aard
Abhd14a	Abca8	Abcg3l1	Aass	Aatk	Aars
Abhd16a	Abca8a	Abhd11	Aatf	Abat	Aarsd1
Abhd17b	Abcb6	Abhd12	Aatk	Abca1	Aasdh
Abhd3	Abcc1	Abhd14a	Abat	Abca2	Aasdhppt
Abhd6	Abcc3	Abhd17a	Abca1	Abca4	Aass
Abhd8	Abcc8	Abhd17b	Abca2	Abca5	Aatf
Abi2	Abcd1	Abhd17c	Abca4	Abca7	Aatk
Ablim1	Abcd2	Abhd3	Abca5	Abca8	Abat
Abtb2	Abcg1	Abhd4	Abca8a	Abcb10	Abca1
Acaa1b	Abcg3l1	Abhd8	Abcb1a///Abcb1b	Abcb1a	Abca2
Acadl	Abhd11	Abi3	Abcb4	Abcb1a///Abcb1b	Abca4
Acan	Abhd11os	Acaca	Abcb6	Abcb4	Abca5
Acap1	Abhd13	Acad9	Abcb9	Abcb6	Abca7
Acat1	Abhd14a	Acadm	Abcc2	Abcb8	Abca8
Acbd5	Abhd17a	Acat2	Abcc3	Abcb9	Abca8a
Acer3	Abhd17b	Acer3	Abcc4	Abcc2	Abcb10
Ackr3	Abhd17c	Ackr3	Abcc5	Abcc3	Abcb1a
Acly	Abhd3	Aco2	Abcc8	Abcc4	Abcb1b
Acot9	Abhd4	Acot13	Abcc9	Abcc5	Abcb4
Acp5	Abhd5	Acot4	Abcd1	Abcc8	Abcb6
Acpp	Abhd6	Acot9	Abcd2	Abcc9	Abcb8
Acsl3	Abhd8	Acp1	Abcd3	Abcd1	Abcb9
Acsl4	Abi2	Acpp	Abcd4	Abcd2	Abcc1
Acsl6	Abi3	Acsbg1	Abce1	Abcd3	Abcc2
Acsm3	Abracl	Acsf2	Abcf1	Abcf2	Abcc3
Acss2	Abtb2	Acss1	Abcf2	Abcf3	Abcc4
Acta2	Acaca	Acss2	Abcf3	Abcg1	Abcc5
Acta2///Actc1	Acad10	Actn1	Abcg2	Abcg2	Abcc8
Actn1	Acad9	Actr10	Abcg4	Abcg4	Abcc9
Actn2	Acads	Actr2	Abhd1	Abcg8	Abcd1
Actr10	Acadsb	Actr3	Abhd11	Abhd1	Abcd2
Actr3	Acadvl	Actr8	Abhd13	Abhd10	Abcd3
Acvr1b	Acan	Acyp1	Abhd14b	Abhd11	Abcd4
Acyp1	Acap1	Acyp2	Abhd16a	Abhd13	Abce1
Adam11	Acat2	Ada	Abhd17b	Abhd14b	Abcf1
Adam6	Acbd5	Adam8	Abhd17c	Abhd16a	Abcf2
Adam8	Ache	Adam9	Abhd18	Abhd17a	Abcf3
Adam9	Ackr3	Adamts1	Abhd2	Abhd17b	Abcg1
Adamts1	Acly	Adamts17	Abhd3	Abhd17c	Abcg2
Adamts17	Aco2	Adamts2	Abhd5	Abhd18	Abcg3l1
Adamts7	Acot13	Adamts7	Abhd6	Abhd2	Abcg4
Adarb1	Acp1	Adamtsl5	Abhd8	Abhd3	Abcg8
Adarb2	Acp5	Adarb1	Abi2	Abhd5	Abhd1
Adcy2	Acp6	Adcy2	Abi3	Abhd6	Abhd10
Adcy5	Acpp	Adcyap1r1	Abi3bp	Abhd8	Abhd11
Adcy8	Acsbg1	Adgra2	Ablim1	Abi2	Abhd11os
Adcyap1	Acsl1	Adgra3	Ablim2	Abi3	Abhd12
Adcyap1r1	Acsl3	Adgre5	Ablim3	Abi3bp	Abhd13
Adh1	Acsl4	Adgrf4	Abo	Ablim1	Abhd14a
Adh4	Acsl5	Adhfe1	Abr	Ablim2	Abhd14b
Adhfe1	Acsl6	Adig	Abra	Ablim3	Abhd16a
Adi1	Acsm3	Adipoq	Abracl	Abo	Abhd17a
Adipoq	Acss1	Adipor1	Abt1	Abr	Abhd17b
Adm	Acss2	Adnp	Abtb1	Abracl	Abhd17c
Adnp	Acta2	Adprhl2	Acaa2	Acaa2	Abhd18
Adprhl2	Acta2///Actc1	Adssl1	Acaca	Acaca	Abhd2
Adra2c	Actb	Afap1l1	Acad11	Acad10	Abhd3
Aebp1	Actg1	Aff4	Acad8	Acad8	Abhd4
Afap1l1	Actg2	Aga	Acadl	Acadl	Abhd5
Aga	Actn1	Agap1	Acads	Acan	Abhd6
Agap1	Actn4	Agl	Acan	Acap1	Abhd8
Agap3	Actr10	Agmat	Acap1	Acap3	Abi2
Agbl3	Actr2	Agpat1	Acap3	Acat1	Abi3
Agfg1	Actr3	Agpat2	Acat1	Acat2	Abi3bp
Agpat1	Actr6	Agpat3	Acat2	Acbd3	Ablim1
Agpat2	Actr8	Agtpbp1	Acbd3	Acbd4	Ablim2
Agpat3	Acvr1b	Agtrap	Acbd4	Acbd5	Ablim3
Agrn	Acvr1c	Ahdc1	Acbd5	Acbd6	Abo
Agt	Acvr2a	Aida	Accs	Accs	Abr
Agtpbp1	Acy3	Aif1l	Acin1	Acd	Abra
Agtr1a	Acyp1	Aifm2	Ackr1	Acer2	Abracl
Agtr1b	Acyp2	Aifm3	Ackr3	Acer3	Abt1
Agtr2	Adam10	Aimp1	Ackr4	Acin1	Abtb1
Agxt2	Adam11	Aipl1	Acly	Ackr1	Abtb2
Ahnak	Adam19	Ak2	Aco1	Ackr3	Acaa1b
Ahr	Adam1a	Ak3	Aco2	Ackr4	Acaa2
Aida	Adam6	Akap13	Acot1	Acly	Acaca
Aif1l	Adam8	Akip1	Acot13	Acmsd	Acad10
Aifm2	Adam9	Akna	Acot2///Acot1	Aco1	Acad11
Aifm3	Adamts1	Akr1b10	Acot4	Aco2	Acad8
Aig1	Adamts17	Akr1b8	Acot7	Acot1	Acad9
Aimp1	Adamts7	Akr1c1	Acot8	Acot13	Acadl
Aimp2	Adamtsl5	Akr1e2	Acot9	Acot2	Acadm
Aipl1	Adarb1	Akt2	Acox3	Acot3	Acads
Ak2	Adarb2	Alcam	Acp2	Acot4	Acadsb
Ak3	Adcy2	Aldh16a1	Acp5	Acot7	Acadvl
Ak4	Adcy3	Aldh1b1	Acp6	Acot8	Acan
Akap1	Adcy4	Aldh2	Acpp	Acot9	Acap1
Akap12	Adcy8	Aldh5a1	Acrbp	Acox3	Acap3
Akap13	Adcyap1	Aldh9a1	Acsbg1	Acp1	Acat1
Akap2	Adcyap1r1	Aldoc	Acsf2	Acp2	Acat2
Akip1	Add1	Alg2	Acsl1	Acp5	Acbd3
Akna	Add3	Alg5	Acsl3	Acpp	Acbd4
Akr1b10	Adgrb3	Alg8	Acsl4	Acr	Acbd5
Akr1b8	Adgre5	Alkbh7	Acsl5	Acrv1	Acbd6
Aktip	Adgrf4	Alox5ap	Acsl6	Acsbg1	Accs
Alas2	Adgrf5	Aloxe3	Acsm3	Acsl1	Acd
Alb	Adgrg1	Alpl	Acss1	Acsl3	Acer2
Alcam	Adgrg6	Als2cl	Acss2	Acsl4	Acer3
Aldh16a1	Adgrl2	Alx3	Acss3	Acsl5	Ache
Aldh1a1	Adgrl4	Ambra1	Acta1	Acsl6	Acin1
Aldh1l1	Adh4	Amer2	Acta2	Acsm1	Ackr1
Aldh5a1	Adhfe1	Amh	Acta2///Actc1	Acsm3	Ackr3
Aldob	Adi1	Amn	Actg1	Acss1	Ackr4
Aldoc	Adig	Ampd2	Actg2	Acss2	Acly
Alg8	Adipor1	Anapc7	Actl6a	Acss3	Acmsd
Alox15	Adk	Angpt2	Actl6b	Acta2	Aco1
Alox5	Adnp	Angpt4	Actn1	Acta2///Actc1	Aco2
Alox5ap	Adora1	Angptl4	Actn3	Actg1	Acot1
Alyref	Adra1d	Ank1	Actn4	Actg2	Acot13
Ambra1	Adra2a	Ankrd11	Actr10	Actl6a	Acot2
Amelx	Adra2c	Ankrd13a	Actr1b	Actl6b	Acot3
Amer2	Adtrp	Ankrd13b	Actr2	Actl7b	Acot4
Amigo1	Aebp1	Ankrd13c	Actr3b	Actn1	Acot7
Amigo3	Afdn	Ankrd13d	Acvr1	Actn3	Acot8
Ampd1	Aff3	Ankrd17	Acvr1c	Actn4	Acot9
Ampd2	Aff4	Ankrd28	Acvr2a	Actr10	Acox3
Angpt2	Afm	Ankrd34b	Acvr2b	Actr1a	Acp1
Angpt4	Afp	Ankrd40	Acvrl1	Actr1b	Acp2
Angptl1	Aga	Ankrd44	Acy1	Actr2	Acp5
Angptl4	Agap1	Ankrd46	Acyp1	Actr3b	Acp6
Ank1	Agap3	Ankrd49	Acyp2	Actr6	Acpp
Ank3	Ager	Ankrd50	Ada	Actr8	Acr
Ankmy2	Agfg1	Ankrd55	Adam10	Acvr1	Acrbp
Ankrd13a	Agl	Ankrd9	Adam11	Acvr2a	Acrv1
Ankrd13d	Agmat	Anks3	Adam15	Acvr2b	Acsbg1
Ankrd17	Agpat1	Anks4b	Adam17	Acvrl1	Acsf2
Ankrd28	Agpat2	Ano4	Adam19	Acy1	Acsl1
Ankrd34b	Agpat3	Ano6	Adam1a	Acyp1	Acsl3
Ankrd40	Agrn	Antxr2	Adam22	Acyp2	Acsl4
Anks3	Agt	Anxa1	Adam23	Ada	Acsl5
Anln	Agtpbp1	Anxa3	Adam32	Adam10	Acsl6
Ano6	Agtr1b	Anxa4	Adam33	Adam11	Acsm1
Anpep	Agtr2	Anxa7	Adam8	Adam15	Acsm3
Antxr2	Agxt	Ap1g1	Adam9	Adam17	Acss1
Anxa1	Ahctf1	Ap1m1	Adamts1	Adam19	Acss2
Anxa2	Ahcyl1	Ap1s2	Adamts10	Adam22	Acss3
Anxa3	Ahcyl2	Ap3m2	Adamts12	Adam23	Acta1
Anxa7	Ahi1	Apbb2	Adamts15	Adam32	Acta2
Aox1	Ahnak	Apitd1	Adamts16	Adam33	Actb
Ap1g1	Ahr	Apmap	Adamts19	Adam8	Actc1
Ap1m1	Ahsg	Apobr	Adamts4	Adam9	Actg1
Ap1s1	Aida	Apold1	Adamts5	Adamts1	Actg2
Ap1s2	Aif1	App	Adamts6	Adamts10	Actl6a
Ap2b1	Aif1l	Aqp11	Adamts7	Adamts12	Actl6b
Ap2s1	Aifm2	Aqp4	Adamts8	Adamts15	Actl7b
Ap3m2	Aifm3	Araf	Adamts9	Adamts16	Actn1
Ap5s1	Aig1	Arf1	Adamtsl1	Adamts19	Actn2
Apeg3	Aimp1	Arf2	Adamtsl2	Adamts4	Actn3
Apitd1	Aip	Arfgef1	Adamtsl4	Adamts5	Actn4
Apln	Aipl1	Arfip1	Adap1	Adamts6	Actr10
Aplnr	Ak2	Arhgap18	Adap2	Adamts7	Actr1a
Aplp2	Ak3	Arhgap30	Adar	Adamts8	Actr1b
Apoa1	Ak4	Arhgap4	Adarb1	Adamts9	Actr2
Apob	Akap1	Arhgap42	Adck1	Adamtsl1	Actr3
Apobec1	Akap11	Arhgap44	Adck2	Adamtsl4	Actr3b
Apoc2	Akap12	Arhgap9	Adcy10	Adamtsl5	Actr6
Apoc3	Akap13	Arhgdia	Adcy2	Adap1	Actr8
Apod	Akap5	Arhgdib	Adcy3	Adap2	Acvr1
Apoh	Akap9	Arhgef10l	Adcy4	Adar	Acvr1b
Apom	Akip1	Arhgef16	Adcy5	Adarb1	Acvr1c
Apon	Akna	Arhgef3	Adcy8	Adat3	Acvr2a
App	Akr1b7	Arhgef40	Adcyap1	Adck2	Acvr2b
Aprt	Akr1b8	Arid4b	Adcyap1r1	Adcy10	Acvrl1
Aqp11	Akr1c14	Arih1	Add2	Adcy2	Acy1
Aqp12a	Akr7a3	Arl11	Add3	Adcy3	Acy3
Aqp4	Akt3	Arl2bp	Adgra1	Adcy4	Acyp1
Aqp7	Aktip	Arl5c	Adgra2	Adcy5	Acyp2
Araf	Alb	Arl6	Adgra3	Adcy6	Ada
Arf1	Alcam	Arl6ip1	Adgrb1	Adcy8	Adam10
Arf2	Aldh1a1	Arl6ip5	Adgrb2	Adcyap1	Adam11
Arf4	Aldh1l1	Arl8a	Adgrb3	Adcyap1r1	Adam15
Arf6	Aldh2	Armc7	Adgrd1	Add1	Adam17
Arg1	Aldh3a2	Armcx1	Adgre1	Add2	Adam19
Arhgap10	Aldh5a1	Armcx2	Adgre5	Add3	Adam1a
Arhgap30	Aldoa	Armcx3	Adgrf5	Adgra1	Adam22
Arhgap44	Aldoc	Armt1	Adgrg1	Adgra2	Adam23
Arhgap8	Alg2	Arnt2	Adgrg5	Adgra3	Adam32
Arhgdia	Alg5	Arpc2	Adgrg6	Adgrb1	Adam33
Arhgdib	Alg8	Arpc3	Adgrl1	Adgrb2	Adam6
Arhgef10l	Alkbh7	Arpc5	Adgrl2	Adgrb3	Adam8
Arhgef11	Alox5ap	Arpp21	Adgrl3	Adgrd1	Adam9
Arhgef16	Aloxe3	Arrb2	Adgrl4	Adgre1	Adamts1
Arhgef26	Alpl	Arrdc2	Adgrv1	Adgre5	Adamts10
Arhgef3	Als2cl	Arsb	Adh1	Adgrf5	Adamts12
Arhgef7	Alx3	Arse	Adh5	Adgrg1	Adamts15
Arhgef9	Alyref	Art1	Adhfe1	Adgrg2	Adamts16
Arid2	Ambra1	Art2b	Adipor1	Adgrg5	Adamts17
Arid4b	Amer2	Art3	Adipor2	Adgrg6	Adamts19
Arid5a	Amh	Art4	Adm	Adgrl1	Adamts2
Arl1	Amhr2	Art5	Adnp	Adgrl2	Adamts4
Arl11	Amigo1	Arx	Adora1	Adgrl3	Adamts5
Arl4a	Ammecr1l	Asap3	Adora2a	Adgrl4	Adamts6
Arl6ip5	Ampd2	Asb3	Adora2b	Adgrv1	Adamts7
Arl8a	Anapc10	Ascc2	Adprh	Adh1	Adamts8
Armc7	Anapc4	Asf1a	Adprhl1	Adh6a	Adamts9
Armcx1	Anapc5	Aspscr1	Adprm	Adhfe1	Adamtsl1
Arnt2	Anapc7	Asrgl1	Adra1b	Adipor1	Adamtsl2
Arpc1b	Angpt2	Asxl1	Adra1d	Adipor2	Adamtsl4
Arpc2	Angpt4	Atf1	Adra2a	Adk	Adamtsl5
Arpc3	Angptl1	Atf4	Adra2b	Adm	Adap1
Arpc5	Angptl3	Atf6	Adra2c	Adora1	Adap2
Arr3	Angptl4	Atg10	Adrb1	Adora2a	Adar
Arrdc1	Ank1	Atg2b	Adrb2	Adpgk	Adarb1
Arrdc2	Ank3	Atg5	Adsl	Adprh	Adarb2
Art1	Ankh	Atic	Adss	Adprm	Adat3
Art2b	Ankmy2	Atmin	Adssl1	Adra1b	Adck1
Art4	Ankrd13a	Atox1	Adtrp	Adra1d	Adck2
Art5	Ankrd13b	Atp10a	Aebp1	Adra2b	Adcy10
Arvcf	Ankrd13d	Atp10d	Aebp2	Adra2c	Adcy2
Arx	Ankrd17	Atp11a	Aen	Adrb1	Adcy3
Asap3	Ankrd28	Atp1b4	Aes	Adrb2	Adcy4
Asb1	Ankrd34b	Atp5g3	Afap1l2	Adss	Adcy5
Asb2	Ankrd40	Atp5j2	Afdn	Adssl1	Adcy6
Aspa	Ankrd46	Atp5l	Aff1	Adtrp	Adcy8
Aspg	Ankrd49	Atp5o	Aff2	Aebp1	Adcyap1
Aspn	Ankrd50	ATP6	Aff4	Aebp2	Adcyap1r1
Asrgl1	Ankrd55	ATP6///ATP8	Afg3l1	Aen	Add1
Asxl1	Ankrd9	Atp6v0b	Afm	Aes	Add2
Atf1	Anks3	Atp6v0c	Afmid	Afap1	Add3
Atf2	Ano4	Atp6v0d1	Aftph	Afap1l2	Adgra1
Atf3	Ano6	Atp6v0e1	Aga	Afdn	Adgra2
Atf4	Anp32a	Atp6v0e2	Agap1	Aff1	Adgra3
Atf6	Anp32e	Atp6v1c2	Agap2	Aff2	Adgrb1
Atic	Anpep	Atp6v1g1	Agap3	Aff4	Adgrb2
Atl2	Antxr2	Atp7a	Agfg1	Afg3l1	Adgrb3
Atox1	Anxa1	Atp8b2	Aggf1	Afg3l2	Adgrd1
Atp10d	Anxa11	Atp9b///Atp9a	Agl	Afmid	Adgre1
Atp11a	Anxa2	Atraid	Agmo	Aftph	Adgre5
Atp1a1	Anxa3	Atrip	Agpat2	Aga	Adgrf4
Atp1a2	Anxa4	Atxn1l	Agpat3	Agap1	Adgrf5
Atp1b1	Anxa5	Atxn2	Agpat4	Agap2	Adgrg1
Atp1b4	Anxa7	Aup1	Agps	Agap3	Adgrg2
Atp2a2	Anxa8	Aurka		Agfg1	Adgrg5
Atp2b1	Aox1	Avpi1	Agt	Agk	Adgrg6
Atp2b2	Ap1g1	B2m	Agtpbp1	Agl	Adgrl1
Atp2b3	Ap1m1	B3galnt1	Agtr1a	Agmo	Adgrl2
Atp4b	Ap1s2	B3gat3	Agtr2	Agpat1	Adgrl3
Atp5a1	Ap2a2	B3gnt2	Agtrap	Agpat2	Adgrl4
Atp5c1	Ap2b1	B3gnt7	Ahctf1	Agpat3	Adgrv1
Atp5e	Ap2s1	B4galnt4	Ahcy	Agpat4	Adh1
Atp5g3	Ap3m1	B4galt1	Ahcyl1	Agpat5	Adh4
Atp5o	Ap3m2	B4galt2	Ahi1	Agr2	Adh5
Atp5sl	Ap4s1	B4galt5	Ahnak	Agt	Adh6a
ATP6///ATP8	Ap5s1	B4galt6	Ahrr	Agtpbp1	Adhfe1
Atp6v1a	Ap5z1	Baalc	Ahsp	Agtr1a	Adi1
Atp6v1c1	Apaf1	Bag3	Aida	Agtr2	Adig
Atp7a	Apba2	Bahd1	Aif1	Agtrap	Adipoq
Atp7b	Apba3	Baiap2	Aif1l	Agxt	Adipor1
Atp8b2	Aph1a	Banf1	Aifm2	Ahctf1	Adipor2
Atpif1	Api5	Baz1a	Aifm3	Ahcyl1	Adk
Atrn	Apitd1	Bbc3	Aimp2	Ahcyl2	Adm
Atxn1l	Apitd1///Pgd///Kif1b///Cort	Bbox1	Aip	Ahi1	Adnp
Auh	Aplnr	Bbs2	Aipl1	Ahnak	Adora1
Aup1	Aplp1	Bbs4	Ajap1	Ahr	Adora2a
Aurka	Aplp2	Bcat1	Ajuba	Ahsa1	Adora2b
Avpi1	Apmap	Bcl10	Ak1	Ahsp	Adpgk
Avpr2	Apoa1	Bcl2a1	Ak2	Aida	Adprh
Azgp1	Apoa4	Bcl2l12	Ak3	Aif1	Adprhl1
B3galnt1	Apob	Bcl3	Ak4	Aif1l	Adprhl2
B3gat1	Apobec1	Bcl6b	Ak6///Taf9	Aifm2	Adprm
B3gnt2	Apobec2	Bcl7c	Ak7	Aifm3	Adra1b
B3gnt7	Apoc2	Bclaf1	Akain1	Aig1	Adra1d
B3gntl1	Apoe	Bcs1l	Akap10	Aimp1	Adra2a
B4galnt4	Apoh	Bdp1	Akap11	Aip	Adra2b
B4galt1	Apol9a	Bean1	Akap12	Aipl1	Adra2c
Baalc	Apool	Begain	Akap13	Ajap1	Adrb1
Bad	App	Bet1l	Akap14	Ajuba	Adrb2
Bag3	Appbp2	Bex1	Akap2	Ak1	Adsl
Bak1	Aprt	Bex3	Akap3	Ak2	Adss
Banf1	Aqp11	Bex4	Akap6	Ak3	Adssl1
Batf	Aqp2	Bicdl1	Akap7	Ak4	Adtrp
Baz1a	Aqp3	Bin2	Akap8l	Ak6///Taf9	Aebp1
Bbs2	Aqp4	Bin2a	Akap9	Ak7	Aebp2
Bbs4	Arf1	Bloc1s3	Akip1	Akain1	Aen
Bcar1	Arf2	Bloc1s4	Akirin1	Akap1	Aes
Bcl10	Arf4	Bmp1	Akr1b1	Akap10	Afap1
Bcl2a1	Arf6	Bmp4	Akr1b10	Akap11	Afap1l1
Bcl2l11	Arfgef1	Bmp5	Akr1b8	Akap12	Afap1l2
Bcl3	Arfip1	Bmp6	Akr1c14	Akap13	Afdn
Bdh2	Arg1	Bmp7	Akr1c19	Akap2	Aff1
Bdnf	Arhgap1	Bmt2	Akr1cl	Akap6	Aff2
Bdp1	Arhgap10	Bnip3	Akr1d1	Akap8l	Aff3
Bend3	Arhgap18	Borcs8	Akr1e2	Akap9	Aff4
Bex1	Arhgap25	Bptf	Akr7a3	Akip1	Afg3l1
Bex3	Arhgap30	Brd2	Akt1	Akr1b1	Afg3l2
Bicd2	Arhgap35	Brd3	Akt2	Akr1b10	Afm
Bid	Arhgap42	Brd4	Akt3	Akr1b8	Afmid
Bin1	Arhgap44	Bri3	Aktip	Akr1c14	Afp
Birc2	Arhgap8	Brms1	Alad	Akr1c19	Aftph
Blk	Arhgap9	Brms1l	Alas1	Akr1c3	Aga
Bloc1s3	Arhgdia	Bscl2	Alas2	Akr1cl	Agap1
Blvra	Arhgdib	Bsnd	Alb	Akr1e2	Agap2
Bmp1	Arhgef10	Btbd1	Aldh16a1	Akr7a3	Agap3
Bmp2k	Arhgef16	Btbd3	Aldh18a1	Akt1	Agbl3
Bmp6	Arhgef18	Btbd7	Aldh1a1	Akt2	Ager
Bmp7	Arhgef26	Btrc	Aldh1a2	Akt3	Agfg1
Bmt2	Arhgef3	C1galt1c1	Aldh1a3	Aktip	Aggf1
Bmyc	Arhgef4	C1qa	Aldh1a7	Alad	Agk
Bop1	Arhgef40	C1qc	Aldh1b1	Alas1	Agl
Bphl	Arhgef9	C1ql3	Aldh1l1	Alas2	Agmat
Bpifa2	Arid2	C2	Aldh1l2	Alb	Agmo
Bpifa2f	Arid4b	C2cd2	Aldh2	Alcam	Agpat1
Bptf	Arid5a	C2cd3	Aldh3a2	Aldh16a1	Agpat2
Brap	Arih1	C2cd5	Aldh3b1	Aldh18a1	Agpat3
Brd2	Arl11	C6	Aldh5a1	Aldh1a1	Agpat4
Brd3	Arl16	C8b	Aldh6a1	Aldh1a2	Agpat5
Brms1l	Arl3	Ca5b	Aldh7a1	Aldh1a3	Agps
Bst1	Arl4a	Cables2	Aldoc	Aldh1a7	Agr2
Btbd3	Arl6	Cacna1g	Alg10	Aldh1b1	Agrn
Btbd6	Arl6ip1	Cacng1	Alg12	Aldh1l1	Agt
Btd	Arl6ip4	Cacul1	Alg13	Aldh1l2	Agtpbp1
Btg1	Arl6ip5	Cacybp	Alg14	Aldh2	Agtr1a
Btg2	Arl6ip6	Calcoco1	Alg2	Aldh3a1	Agtr1b
Bysl	Arl8a	Calhm2	Alg5	Aldh3a2	Agtr2
C1qa	Armc10	Calm1	Alg8	Aldh3b1	Agtrap
C1qb	Armc6	Calu	Alg9	Aldh4a1	Agxt
C1qc	Armc7	Camk2a	Alk	Aldh5a1	Agxt2
C1ql1	Armc8	Camk2b	Alkbh1	Aldh6a1	Ahctf1
C3	Armcx1	Camk2n1	Alkbh4	Aldh7a1	Ahcy
C5ar1	Armcx2	Camkmt	Alkbh5	Aldh9a1	Ahcyl1
C6	Arnt2	Cand2	Alkbh7	Aldoa	Ahcyl2
C8b	Arpc1b	Cant1	Alox12	Aldoc	Ahdc1
C8g	Arpc2	Cap1	Alox15	Alg14	Ahi1
Ca5b	Arpc3	Cap2	Alox5	Alg2	Ahnak
Caap1	Arpc5	Caprin1	Alox5ap	Alg3	Ahr
Cabp1	Arpc5l	Capzb	Aloxe3	Alg5	Ahrr
Cacna1g	Arpp21	Car1	Alpl	Alg8	Ahsa1
Cacna2d1	Arrb2	Car12	Alyref	Alg9	Ahsg
Cad	Arrdc2	Car14	Amacr	Alk	Ahsp
Cadps	Arse	Card11	Amdhd2	Alkbh2	Aida
Cadps2	Art1	Card19	Amer2	Alkbh3	Aif1
Calhm2	Art2b	Carhsp1	Amer3	Alkbh4	Aif1l
Calm1	Art3	Carm1	Amfr	Alkbh5	Aifm2
Calm2///Calm3///Calm1	Art4	Carmil2	Amh	Alkbh7	Aifm3
Calr	Art5	Casc3	Amhr2	Alox12	Aig1
Calu	Arv1	Caskin1	Amigo1	Alox15	Aimp1
Camk2b	Arx	Casp3	Amigo3	Alox5	Aimp2
Camk2d	Asap1	Casp4	Amot	Alox5ap	Aip
Camk2g	Asap3	Casp7	Amotl1	Aloxe3	Aipl1
Camk2n1	Asb1	Cast	Amotl2	Alpi	Ajap1
Camkk1	Asb11	Cav2	Ampd1	Alpk3	Ajuba
Canx	Asb2	Cbarp	Ampd2	Alpl	Ak1
Cap1	Asb3	Cbfa2t2	Ampd3	Als2cl	Ak2
Cap2	Asf1a	Cbfb	Amt	Alyref	Ak3
Capg	Asf1b	Cblb	Amz2	Amacr	Ak4
Capn6	Asgr2	Cblc	Anapc1	Ambp	Ak6
Caprin1	Asic2	Cbln1	Anapc15	Ambra1	Ak7
Capza1	Asic3	Cbln2	Anapc4	Amd1	Akain1
Car12	Asna1	Cbr3	Anapc5	Amdhd2	Akap1
Car14	Aspa	Cc2d1a	Ang	Amer2	Akap10
Car2	Aspg	Ccdc107	Angel1	Amer3	Akap11
Car7	Aspn	Ccdc115	Angel2	Amhr2	Akap12
Card19	Asrgl1	Ccdc117	Angpt1	Amigo1	Akap13
Carhsp1	Asxl1	Ccdc125	Angpt2	Amigo3	Akap14
Carm1	Atad2	Ccdc126	Angpt4	Ammecr1l	Akap2
Casc3	Atf2	Ccdc153	Angptl2	Amn	Akap3
Caskin1	Atf3	Ccdc25	Angptl4	Amn1	Akap5
Casp2	Atf4	Ccdc28a	Angptl6	Amot	Akap6
Casp3	Atf6	Ccdc47	Angptl8	Amotl1	Akap7
Casp7	Atg10	Ccdc58	Ank2	Amotl2	Akap8l
Cast	Atg5	Ccdc80	Ank3	Ampd1	Akap9
Catsper2	Atic	Ccdc85b	Ankh	Ampd2	Akip1
Cbarp	Atmin	Ccdc86	Ankhd1	Ampd3	Akirin1
Cbfb	Atp10d	Ccdc91	Ankib1	Amt	Akna
Cblb	Atp11b	Ccdc92	Ankle2	Amz2	Akr1b1
Cbln1	Atp12a	Ccl19	Ankmy2	Anapc1	Akr1b10
Cbln2	Atp1a1	Ccl6	Ankrd1	Anapc10	Akr1b7
Cbs	Atp1a2	Ccl9	Ankrd10	Anapc4	Akr1b8
Cbx7	Atp1b1	Ccna1	Ankrd11	Ang	Akr1c1
Ccdc112	Atp1b2	Ccnc	Ankrd13d	Angel2	Akr1c14
Ccdc126	Atp1b3	Ccnd1	Ankrd2	Angpt1	Akr1c19
Ccdc130	Atp1b4	Ccng1	Ankrd23	Angpt2	Akr1c3
Ccdc17	Atp2a2	Ccng2	Ankrd24	Angpt4	Akr1cl
Ccdc28a	Atp2b2	Ccni	Ankrd33b	Angptl2	Akr1d1
Ccdc28b	Atp2b3	Ccnl2	Ankrd34a	Angptl3	Akr1e2
Ccdc53	Atp2c1	Ccp110	Ankrd34b	Angptl4	Akr7a3
Ccdc71l	Atp5c1	Ccr6	Ankrd35	Angptl8	Akt1
Ccdc86	Atp5e	Ccr7	Ankrd36	Ank1	Akt2
Ccdc90b	Atp5g3	Ccz1b	Ankrd37	Ank2	Akt3
Ccdc91	Atp5h	Cd163	Ankrd40	Ank3	Aktip
Cckar	Atp5j	Cd180	Ankrd42	Ankhd1	Alad
Ccl19	Atp5j2	Cd244	Ankrd45	Ankib1	Alas1
Ccl2	Atp5o	Cd276	Ankrd46	Ankmy2	Alas2
Ccl21	Atp5sl	Cd300a	Ankrd49	Ankrd1	Alb
Ccl3	ATP6	Cd34	Ankrd50	Ankrd13d	Alcam
Ccl4	ATP6///ATP8	Cd47	Ankrd53	Ankrd16	Aldh16a1
Ccl6	Atp6v0c	Cd55	Ankrd55	Ankrd2	Aldh18a1
Ccl9	Atp6v0e1	Cd63	Ankrd6	Ankrd33b	Aldh1a1
Ccna1	Atp6v0e2	Cd68	Ankrd9	Ankrd34a	Aldh1a2
Ccnc	Atp6v1a	Cd82	Anks1a	Ankrd34b	Aldh1a3
Ccnd1	Atp7b	Cd83	Anks1b	Ankrd35	Aldh1a7
Ccnd3	Atp8b2	Cd86	Anln///Anlnl1	Ankrd36	Aldh1b1
Ccndbp1	Atp9b///Atp9a	Cd99	Ano1	Ankrd40	Aldh1l1
Ccng1	Atpaf1	Cd99l2	Ano3	Ankrd45	Aldh1l2
Ccnl1	Atpaf2	Cdadc1	Ano4	Ankrd46	Aldh2
Ccp110	Atpif1	Cdc14a	Ano6	Ankrd49	Aldh3a1
Ccpg1	Atrip	Cdc20	Anp32b	Ankrd50	Aldh3a2
Ccr1	Atrn	Cdc23	Anp32e	Ankrd52	Aldh3b1
Ccr3	Atxn1l	Cdc25b	Anpep	Ankrd53	Aldh4a1
Ccr5	Atxn2	Cdc26	Antxr1	Ankrd55	Aldh5a1
Cct4	Atxn7l3	Cdc34	Antxr2	Ankrd6	Aldh6a1
Cct5	Atxn7l3b	Cdc42	Anxa1	Ankrd60	Aldh7a1
Cct7	Auh	Cdc42ep5	Anxa11	Anks1a	Aldh9a1
Cd14	Aup1	Cdc42se1	Anxa2	Anks1b	Aldoa
Cd163	Aurka	Cdc45	Anxa3	Anln///Anlnl1	Aldob
Cd24	Aurkb	Cdca3	Anxa4	Ano1	Aldoc
Cd244	Avpi1	Cdca4	Anxa5	Ano3	Alg10
Cd276	Avpr1a	Cdca7l	Anxa7	Ano4	Alg12
Cd300a	Avpr2	Cdca8	Anxa8	Ano5	Alg13
Cd302	Azgp1	Cdh13	Aoc3	Ano6	Alg14
Cd36	B2m	Cdh15	Ap1g1	Ano9	Alg2
Cd38	B3galnt1	Cdh5	Ap1g2	Anp32e	Alg3
Cd40	B3galt5	Cdip1	Ap1s2	Anpep	Alg5
Cd44	B3gat1	Cdk13	Ap1s3	Antxr1	Alg8
Cd53	B3glct	Cdk14	Ap2a2	Antxr2	Alg9
Cd55	B3gnt2	Cdk20	Ap3b1	Anxa1	Alk
Cd63	B3gnt7	Cdk5rap2	Ap3b2	Anxa11	Alkbh1
Cd68	B4galnt1	Cdk5rap3	Ap3m2	Anxa2	Alkbh2
Cd82	B4galnt4	Cdk9	Ap3s1	Anxa3	Alkbh3
Cd83	B4galt1	Cdkn1c	Ap3s2	Anxa4	Alkbh4
Cd8a	B4galt5	Cdkn2c	Apaf1	Anxa5	Alkbh5
Cd93	B4galt6	Cdkn3	Apba1	Anxa7	Alkbh7
Cd99l2	Bad	Cdt1	Apba2	Anxa8	Alox12
Cdadc1	Bag1	Cebpg	Apba3	Aoc1	Alox15
Cdc123	Bag2	Cebpz	Apbb1	Aoc3	Alox5
Cdc14a	Bag6	Celf4	Apbb1ip	Ap1b1	Alox5ap
Cdc23	Baiap2	Celf5	Apbb2	Ap1m2	Aloxe3
Cdc25b	Bak1	Celsr1	Apbb3	Ap1s1	Alpi
Cdc34	Banf1	Cend1	Apc	Ap1s2	Alpk3
Cdc42ep5	Baz1a	Cenpb	Apc2	Ap1s3	Alpl
Cdc42se1	Baz1b	Cenpm	Apeg3	Ap2a2	Als2cl
Cdc45	Bbox1	Cenpn	Apeh	Ap2b1	Alx3
Cdca4	Bbs2	Cenpt	Apex2	Ap3b1	Alyref
Cdca8	Bbs9	Cenpv	Aph1a	Ap3b2	Amacr
Cdcp1	Bcap29	Cep162	Api5	Ap3m2	Ambp
Cdh11	Bcar1	Cep164	Apitd1///Pgd///Kif1b///Cort	Ap3s1	Ambra1
Cdh16	Bcat1	Cep57	Aplf	Ap3s2	Amd1
Cdh22	Bcat2	Cep70	Apln	Ap5z1	Amdhd2
Cdh4	Bccip	Cep76	Aplnr	Apaf1	Amelx
Cdh5	Bckdk	Cep83	Aplp1	Apba1	Amer2
Cdh6	Bcl10	Cerk	Aplp2	Apba2	Amer3
Cdh8	Bcl11a	Cers5	Apmap	Apba3	Amfr
Cdip1	Bcl2a1	Cfap126	Apobec1	Apbb1	Amh
Cdk1	Bcl2l11	Cfap36	Apobec2	Apbb1ip	Amhr2
Cdk4	Bcl2l12	Cfh	Apobec3b	Apbb2	Amigo1
Cdk5r1	Bcl2l15	Cfhr1	Apobr	Apbb3	Amigo3
Cdk5rap3	Bcl3	Cfl1	Apod	Apc	Ammecr1l
Cdkn1a	Bcl6b	Cfl2	Apoh	Apc2	Amn
Cdkn2c	Bclaf1	Cggbp1	Apol3	Apeg3	Amn1
Cdon	Bcs1l	Chac2	Apoo	Apex2	Amot
Cds1	Bdnf	Chaf1a	Apool	Aph1a	Amotl1
Cdt1	Bdp1	Chchd10	Apopt1	Api5	Amotl2
Ceacam1	Becn1	Chchd5	App	Apitd1///Pgd///Kif1b///Cort	Ampd1
Ceacam3	Begain	Chd3	Appbp2	Aplf	Ampd2
Ceacam4	Bex1	Chd4	Appl1	Apln	Ampd3
Ceacam4///Ceacam1	Bex3	Chic1	Appl2	Aplnr	Amt
Cebpb	Bex4	Chic2	Aprt	Aplp1	Amz2
Cebpd	Bfar	Chkb	Aptx	Aplp2	Anapc1
Cebpz	Bgn	Chmp1b	Aqp1	Apmap	Anapc10
Cela1	Bhlhb9	Chmp5	Aqp11	Apoa4	Anapc15
Celf4	Bhlhe40	Chodl	Aqp4	Apob	Anapc4
Cend1	Bicd2	Chp1	Aqp9	Apobec1	Anapc5
Cenpb	Bicdl1	Chrac1	Aqr	Apobec2	Anapc7
Cenpn	Bid	Chrna4	Ar	Apobec3b	Ang
Cenpt	Bin1	Chst14	Araf	Apobr	Angel1
Cep70	Bin2	Chsy1	Arap1	Apoc4	Angel2
Cep95	Bivm	Cic	Arap2	Apod	Angpt1
Cfap161	Blcap	Cisd2	Arap3	Apoe	Angpt2
Cfap52	Blk	Cit	Arc	Apoh	Angpt4
Cfb	Bloc1s3	Cited1	Arcn1	Apol11a	Angptl1
Cfl1	Bloc1s6	Cited2	Areg	Apol3	Angptl2
Cgm4	Blzf1	Ckap4	Arel1	Apol9a	Angptl3
Chac1	Bmp1	Cks1b	Arf2	Apoo	Angptl4
Chaf1a	Bmp2k	Cks2	Arf3	Apool	Angptl6
Chchd10	Bmp3	Clcn2	Arf4	Apopt1	Angptl8
Chd1	Bmp6	Cldn10	Arf5	App	Ank1
Chgb	Bmp7	Cldn12	Arf6	Appbp2	Ank2
Chia	Bmt2	Cldn17	Arfgap1	Appl1	Ank3
Chic1	Bmyc	Cldn2	Arfgap3	Appl2	Ankh
Chic2	Bnip2	Cldn4	Arfgef1	Aprt	Ankhd1
Chmp2b	Bnip3	Cldn6	Arfgef2	Aptx	Ankib1
Chmp5	Boc	Clec2d	Arfip1	Aqp1	Ankle2
Chn1	Borcs8	Clec3b	Arfip2	Aqp11	Ankmy2
Chn2	Bpifa2	Clec4a	Arfrp1	Aqp4	Ankrd1
Chodl	Bpifa2f	Clec4a3	Arg1	Aqp5	Ankrd10
Chpt1	Bpifb4	Clec7a	Arg2	Aqp6	Ankrd11
Chrd	Bptf	Clic1	Arhgap1	Aqp9	Ankrd13a
Chrna4	Brap	Clic3	Arhgap10	Araf	Ankrd13b
Chrnb2	Brca1	Clip1	Arhgap11a	Arap1	Ankrd13c
Chrne	Brd2	Clip4	Arhgap15	Arap2	Ankrd13d
Chst14	Brd3	Clk2///Scamp3	Arhgap17	Arap3	Ankrd16
Chsy1	Bri3	Cln3	Arhgap18	Arc	Ankrd17
Churc1	Brms1	Cln5	Arhgap19	Arcn1	Ankrd2
Cic	Brms1l	Cln6	Arhgap20	Arel1	Ankrd23
Cidea	Bsnd	Cln8	Arhgap21	Arf2	Ankrd24
Cir1	Bst1	Clpb	Arhgap22	Arf3	Ankrd28
Cish	Btbd3	Clptm1l	Arhgap23	Arf4	Ankrd33b
Cit	Btbd6	Clstn1	Arhgap25	Arf6	Ankrd34a
Cited1	Btd	Cmc2	Arhgap26	Arfgap1	Ankrd34b
Cited2	Btf3	Cmtm3	Arhgap27	Arfgap3	Ankrd35
Ckap4	Btg1	Cmtm5	Arhgap28	Arfgef1	Ankrd36
Ckb	Btg2	Cmtm7	Arhgap30	Arfip1	Ankrd37
Cklf	Bub1b	Cmtm8	Arhgap32	Arfip2	Ankrd40
Ckmt1b	Bub3	Cndp1	Arhgap35	Arg1	Ankrd42
Cks1b	Bves	Cndp2	Arhgap39	Arg2	Ankrd44
Clasrp	Bzw1	Cnih4	Arhgap4	Arhgap1	Ankrd45
Clca4	C1qa	Cnn2	Arhgap42	Arhgap10	Ankrd46
Clcn1	C1qb	Cnot10	Arhgap44	Arhgap11a	Ankrd49
Cldn10	C1qc	Cnot4	Arhgap45	Arhgap15	Ankrd50
Cldn17	C1ql3	Cnot6l	Arhgap5	Arhgap17	Ankrd52
Cldn3	C1qtnf4	Cnpy1	Arhgap8	Arhgap18	Ankrd53
Clec10a	C1r	Cnpy4	Arhgap9	Arhgap21	Ankrd55
Clec16a	C2	Coch	Arhgdia	Arhgap22	Ankrd6
Clec3b	C3	Cog3	Arhgdib	Arhgap23	Ankrd60
Clec4a	C3ar1	Col14a1	Arhgdig	Arhgap25	Ankrd9
Clec4a3	C5ar1	Col18a1	Arhgef11	Arhgap26	Anks1a
Clec4f	C6	Col1a2	Arhgef12	Arhgap27	Anks1b
Clec7a	C8a	Col3a1	Arhgef17	Arhgap28	Anks3
Clic1	Ca5b	Col4a1	Arhgef26	Arhgap30	Anks4b
Clic4	Cables2	Col4a2	Arhgef28	Arhgap32	Anln
Clint1	Cabp1	Col4a3bp	Arhgef37	Arhgap35	Ano1
Clip1	Cacna1a	Col5a2	Arhgef4	Arhgap39	Ano3
Clk1	Cacna1b	Col6a2	Arhgef5	Arhgap4	Ano4
Clpp	Cacna1c	Col8a2	Arhgef7	Arhgap42	Ano5
Clps	Cacna1g	Colec12	Arhgef9	Arhgap44	Ano6
Clptm1l	Cacna1h	Commd1	Arid1a	Arhgap45	Ano9
Clta	Cacna2d1	Commd2	Arid1b	Arhgap5	Anp32a
Cltb	Cacnb1	Commd4	Arid2	Arhgap6	Anp32b
Cmbl	Cacnb2	Commd7	Arid3a	Arhgap8	Anp32e
Cmc2	Cacul1	Commd9	Arid4b	Arhgap9	Anpep
Cmpk2	Cacybp	Comtd1	Arid5a	Arhgdib	Antxr1
Cmtm5	Cad	Copa	Arid5b	Arhgdig	Antxr2
Cmtm6	Cadm1	Cope	Arih1	Arhgef10	Anxa1
Cnga1	Cadps	Copg2	Arl1	Arhgef10l	Anxa11
Cnga2	Cadps2	Cops2	Arl11	Arhgef11	Anxa2
Cngb1	Calb1	Cops5	Arl14ep	Arhgef12	Anxa3
Cnih4	Calb2	Cops7a	Arl2	Arhgef16	Anxa4
Cnn1	Calca	Coq2	Arl2bp	Arhgef17	Anxa5
Cnn2	Calcb	Coq4	Arl4a	Arhgef18	Anxa7
Cnot8	Calcrl	Coq8a	Arl4d	Arhgef26	Anxa8
Cnp	Cald1	Coro1a	Arl5a	Arhgef28	Aoc1
Cnpy1	Calhm2	Coro1c	Arl5c	Arhgef37	Aoc3
Cnpy4	Calm1	Coro2b	Arl6	Arhgef4	Aox1
Cntn1	Calm2	Cotl1	Arl6ip1	Arhgef5	Ap1b1
Cntn6	Calm2///Calm3///Calm1	Cox16	Arl6ip4	Arhgef7	Ap1g1
Col18a1	Calml4	Cox18	Arl6ip5	Arhgef9	Ap1g2
Col1a2	Calr	COX3///ATP6	Arl6ip6	Arid1a	Ap1m1
Col27a1	Calu	Cox6b2	Arl8a	Arid1b	Ap1m2
Col2a1	Camk2a	Cox7c	Arl8b	Arid5a	Ap1s1
Col4a1	Camk2b	Cp	Armc1	Arid5b	Ap1s2
Col4a2	Camk2g	Cpa6	Armc10	Arih1	Ap1s3
Col6a2	Camk4	Cpb2	Armc5	Arih2	Ap2a2
Col8a2	Camkk1	Cpeb3	Armc6	Arl1	Ap2b1
Commd1	Cand2	Cplx1	Armc8	Arl10	Ap2s1
Copa	Cant1	Cpm	Armc9	Arl11	Ap3b1
Cope	Canx	Cpne2	Armcx1	Arl14ep	Ap3b2
Cops3	Cap1	Cpne5	Armcx2	Arl16	Ap3m1
Cops8	Cap2	Cpne8	Armcx4	Arl2	Ap3m2
Coq10b	Capg	Cpped1	Armcx6	Arl2bp	Ap3s1
Coq2	Capn3	Cpsf6	Arnt	Arl4a	Ap3s2
Coq3	Capn6	Cpsf7	Arnt2	Arl4d	Ap4s1
Coq4	Capns1	Cpxm1	Arntl	Arl5a	Ap5s1
Coq8a	Caprin1	Cr1l	Arpc1b	Arl5c	Ap5z1
Coq8b	Capza1	Cracr2b	Arpc2	Arl6	Apaf1
Coro1a	Capzb	Crb3	Arpc3	Arl6ip1	Apba1
Coro1c	Car12	Creb3l1	Arpc4	Arl6ip4	Apba2
COX1	Car14	Creb3l3	Arpc5	Arl6ip5	Apba3
COX3///ATP6	Car2	Creb3l4	Arpc5l	Arl6ip6	Apbb1
Cox4i1	Car7	Crebbp	Arpin	Arl8a	Apbb1ip
Cox5a	Card11	Crebl2	Arpp21	Arl8b	Apbb2
Cox6a1	Card19	Crebzf	Arrb1	Armc10	Apbb3
Cox7c	Carhsp1	Crip1	Arrdc1	Armc8	Apc
Cox8a	Carmil2	Crlf1	Arrdc2	Armc9	Apc2
Cox8b	Cartpt	Crp	Arrdc4	Armcx1	Apeg3
Cp	Casp1	Crtac1	Arsa	Armcx2	Apeh
Cpa1	Casp2	Crybg3	Arsb	Armcx4	Apex2
Cpa6	Casp3	Crygn	Arsg	Armcx6	Aph1a
Cpb2	Casp4	Crym	Arsi	Armt1	Api5
Cpd	Casp7	Csf1r	Art1	Arnt	Apitd1
Cpe	Casp8ap2	Csf2ra	Art3	Arnt2	Aplf
Cpeb3	Cast	Csk	Art4	Arntl	Apln
Cpg1	Casz1	Csnk1g2	Arxes2	Arntl2	Aplnr
Cplx1	Cav1	Csnk1g3	Asah1	Arpc1b	Aplp1
Cpm	Cav2	Csnk2a2	Asah2	Arpc2	Aplp2
Cpne2	Cbarp	Cspg4	Asap1	Arpc3	Apmap
Cpne8	Cbfa2t2	Csrnp1	Asap2	Arpc5	Apoa1
Cpsf7	Cbfb	Csrnp2	Asap3	Arpc5l	Apoa4
Cpt1b	Cblb	Csrp1	Asb1	Arpp21	Apob
Cpxm1	Cblc	Cstb	Asb12	Arrdc1	Apobec1
Creb3	Cbln1	Cstf3	Asb13	Arrdc2	Apobec2
Creb3l1	Cbln2	Ctbp2	Asb14	Arrdc4	Apobec3b
Crebbp	Cbs	Ctdnep1	Asb3	Arsa	Apobr
Crebl2	Cbx5	Ctdsp1	Asb8	Arsb	Apoc2
Crebrf	Cbx7	Cthrc1	Ascc2	Arse	Apoc3
Crebzf	Cc2d1b	Ctla2a	Ascc3	Arsi	Apoc4
Crem	Ccar1	Ctnnal1	Ascl1	Art2b	Apod
Crh	Ccdc107	Ctnnb1	Asf1b	Art3	Apoe
Crhbp	Ccdc117	Ctnnbip1	Asgr1	Arv1	Apoh
Crip1	Ccdc126	Ctnnd1	Asgr2	Arx	Apol11a
Crisp2	Ccdc141	Ctnnd2	Ash1l	Arxes2	Apol3
Crispld2	Ccdc17	Ctns	Ash2l	Asah1	Apol9a
Crlf1	Ccdc25	Ctps2	Asic1	Asah2	Apold1
Crp	Ccdc28a	Ctsa	Asic2	Asap1	Apom
Cryab	Ccdc34	Ctsf	Asic4	Asap2	Apon
Cryba1	Ccdc58	Ctsh	Asl	Asap3	Apoo
Crybb1	Ccdc86	Ctsm	Asnsd1	Asb1	Apool
Crybb2	Ccdc90b	Ctsz	Aspa	Asb11	Apopt1
Cryga	Ccdc92	Cttnbp2	Aspg	Asb12	App
Crygc	Cck	Cttnbp2nl	Asph	Asb3	Appbp2
Crygs	Cckar	Ctu2	Asphd2	Asb8	Appl1
Crym	Ccl19	Cuedc2	Aspm	Ascc2	Appl2
Csap1	Ccl2	Cul3	Aspn	Ascc3	Aprt
Cse1l	Ccl3	Cul5	Asprv1	Ascl1	Aptx
Csf2ra	Ccl4	Cutc	Asrgl1	Ascl3	Aqp1
Csk	Ccl6	Cux1	Astn1	Asf1b	Aqp11
Csn2	Ccna2	Cxcl12	Astn2	Asgr2	Aqp12a
Csnk1g2	Ccnb1	Cxcl16	Asun	Ash1l	Aqp2
Csnk2a1	Ccnb1ip1	Cxcr3	Asxl1	Ash2l	Aqp3
Cspg4	Ccnb2	Cxxc5	Asxl3	Asic1	Aqp4
Csrnp1	Ccnc	Cyb561	Atad2	Asic2	Aqp5
Cst3	Ccnd1	Cyb5b	Atad3a	Asic4	Aqp6
Cstb	Ccnd3	Cyb5r4	Atad5	Asna1	Aqp7
Cstf3	Ccndbp1	Cyb5rl	Atat1	Asns	Aqp9
Ctbp2	Ccne1	Cybb	Atcay	Aspa	Aqr
Ctdnep1	Ccnf	Cyfip1	Atf1	Aspg	Ar
Ctdsp1	Ccng1	Cygb	Atf2	Asph	Araf
Ctdspl	Ccnt2	Cyp2b1	Atf3	Asphd2	Arap1
Ctgf	Ccp110	Cyp2s1	Atf4	Aspm	Arap2
Cth	Ccr1	Cyp46a1	Atf7ip	Aspn	Arap3
Ctla4	Cct4	Cyp4v3	Atg13	Asprv1	Arc
Ctnnal1	Cct5	Cyr61	Atg14	Aspscr1	Arcn1
Ctnnd2	Cct7	Cysrt1	Atg16l2	Asrgl1	Areg
Ctps2	Cct8	Cystm1	Atg2b	Ass1	Arel1
Ctsb	Ccz1b	Cytip	Atg4b	Astn1	Arf1
Ctsc	Cd14	Dact3	Atg5	Asun	Arf2
Ctsk	Cd163	Dap	Atg7	Asxl1	Arf3
Ctsl	Cd164	Dapp1	Atg9a	Asxl2	Arf4
Ctsz	Cd180	Dars2	Atl1	Asxl3	Arf5
Cttn	Cd24	Dazap1	Atl2	Atad2	Arf6
Cttnbp2	Cd276	Dazap2	Atl3	Atad5	Arfgap1
Cttnbp2nl	Cd300a	Dbndd1	Atmin	Atat1	Arfgap3
Cuedc2	Cd34	Dbndd2	Atoh8	Atcay	Arfgef1
Cutc	Cd36	Dcaf11	Atp10d	Atf1	Arfgef2
Cx3cl1	Cd37	Dcaf12	Atp11a	Atf2	Arfip1
Cxcl1	Cd38	Dcaf15	Atp11b	Atf3	Arfip2
Cxcl11	Cd3d	Dcaf6	Atp13a1	Atf5	Arfrp1
Cxcl14	Cd4	Dcakd	Atp13a2	Atf6	Arg1
Cxcl2	Cd40	Dck	Atp13a5	Atf7ip	Arg2
Cxcl3	Cd40lg	Dclk1	Atp1a1	Atg10	Arhgap1
Cxcr2	Cd44	Dclk2	Atp1a2	Atg12	Arhgap10
Cxxc5	Cd47	Dclre1a	Atp1a3	Atg13	Arhgap11a
Cyb5r3	Cd48	Dctpp1	Atp1b1	Atg16l1	Arhgap15
Cyba	Cd52	Dcun1d4	Atp1b2	Atg16l2	Arhgap17
Cygb	Cd53	Ddc	Atp23	Atg2a	Arhgap18
Cyhr1	Cd55	Ddit3	Atp2a1	Atg2b	Arhgap19
Cyp17a1	Cd63	Ddr2	Atp2a2	Atg4b	Arhgap20
Cyp1b1	Cd68	Ddx10	Atp2a3	Atg4d	Arhgap21
Cyp26b1	Cd82	Ddx20	Atp2b1	Atg5	Arhgap22
Cyp2a2///Cyp2a1	Cd86	Ddx31	Atp2b2	Atg7	Arhgap23
Cyp2b3	Cd8a	Ddx41	Atp2b3	Atg9a	Arhgap25
Cyp2d4	Cd9	Ddx50	Atp2b4	Atl1	Arhgap26
Cyp3a2	Cd93	Ddx52	Atp2c1	Atl2	Arhgap27
Cyp46a1	Cd99	Ddx6	Atp5a1	Atl3	Arhgap28
Cyp4a1	Cd99l2	Dennd2d	Atp5b	Atmin	Arhgap30
Cyp4a3	Cdadc1	Dennd4c	Atp5c1	Atoh8	Arhgap32
Cyp4f1	Cdc123	Dennd5a	Atp5g3	Atp10a	Arhgap35
Cyp7b1	Cdc14a	Dera	Atp5i	Atp10d	Arhgap39
Cyr61	Cdc14b	Dgat2	Atp5j	Atp11a	Arhgap4
Cys1	Cdc20	Dgkd	Atp5l	Atp11b	Arhgap42
Cytip	Cdc23	Dhcr24	Atp5o	Atp12a	Arhgap44
Cyyr1	Cdc25b	Dhrs11	Atp5s	Atp13a1	Arhgap45
D2hgdh	Cdc26	Dhrs3	Atp5sl	Atp13a2	Arhgap5
Dab2	Cdc34	Dhrs4	Atp6ap1l	Atp13a5	Arhgap6
Dact3	Cdc37l1	Dhrsx	Atp6v0a1	Atp1a2	Arhgap8
Dao	Cdc40	Dhtkd1	Atp6v0a2	Atp1a3	Arhgap9
Dap	Cdc42	Dhx30	Atp6v0c	Atp1b1	Arhgdia
Dapk1	Cdc42bpb	Dhx36	Atp6v0d1	Atp1b2	Arhgdib
Dazap1	Cdc42ep5	Dhx57	Atp6v0e1	Atp23	Arhgdig
Dbh	Cdc42se1	Dhx8	Atp6v0e2	Atp2a1	Arhgef10
Dbi	Cdc42se2	Diaph3	Atp6v1a	Atp2a2	Arhgef10l
Dbn1	Cdc45	Dimt1	Atp6v1b1	Atp2a3	Arhgef11
Dbndd1	Cdca3	Diras3	Atp6v1b2	Atp2b1	Arhgef12
Dbp	Cdca4	Disp2	Atp6v1d	Atp2b2	Arhgef16
Dcaf12	Cdca7l	Dixdc1	Atp6v1e1	Atp2b3	Arhgef17
Dcaf15	Cdca8	Dkk3	Atp6v1f	Atp2c1	Arhgef18
Dcaf6	Cdcp1	Dlc1	Atp6v1g2	Atp4a	Arhgef26
Dcakd	Cdh1	Dlg5	Atp6v1h	Atp5a1	Arhgef28
Dchs1	Cdh13	Dlgap1	Atp7a	Atp5b	Arhgef3
Dck	Cdh16	Dlgap4	Atp8a1	Atp5c1	Arhgef37
Dclk1	Cdh2	Dmxl2	Atp8a2	Atp5d	Arhgef4
Dclk2	Cdh22	Dnah7	Atp8b1	Atp5g3	Arhgef40
Dcn	Cdh4	Dnajb12	Atp8b2	Atp5h	Arhgef5
Dctn4	Cdh5	Dnajb6	Atp8b4	Atp5i	Arhgef7
Dctpp1	Cdh8	Dnajc19	Atp9a	Atp5j	Arhgef9
Dcun1d4	Cdip1	Dnajc21	Atpaf1	Atp5l	Arid1a
Ddc	Cdk1	Dnajc24	Atr	Atp5o	Arid1b
Ddost	Cdk14	Dnajc27	Atrn	Atp5s	Arid2
Ddr2	Cdk16	Dnajc6	Atrnl1	Atp5sl	Arid3a
Ddx10	Cdk19	Dnase1l1	Atrx	Atp6ap1l	Arid4b
Ddx17	Cdk2	Dnase2	Atxn1l	Atp6v0a1	Arid5a
Ddx21	Cdk20	Dock6	Atxn2	Atp6v0a2	Arid5b
Ddx31	Cdk4	Dock7	Atxn7l1	Atp6v0a4	Arih1
Ddx39a	Cdk5r1	Dock8	Atxn7l3b	Atp6v0b	Arih2
Ddx41	Cdk5rap2	Dock9	Auh	Atp6v0c	Arl1
Ddx52	Cdk5rap3	Dok3	Aunip	Atp6v0d1	Arl10
Ddx54	Cdk7	Dok7	Aup1	Atp6v0e1	Arl11
Decr2	Cdk9	Dot1l	Aurka	Atp6v0e2	Arl14ep
Degs2	Cdkal1	Dpcd	Aurkb	Atp6v1a	Arl16
Dennd2d	Cdkn1a	Dpep2	Aurkc	Atp6v1d	Arl2
Dennd5a	Cdkn1c	Dpm1	Aven	Atp6v1e1	Arl2bp
Dgat2	Cdkn2c	Dpp4	Avil	Atp6v1f	Arl3
Dgkd	Cdkn3	Dpp7	Avl9	Atp6v1g2	Arl4a
Dgkg	Cdr2	Dpt	Avpi1	Atp6v1h	Arl4d
Dgkq	Cds1	Dpy19l1	Avpr1a	Atp7a	Arl5a
Dhdds	Cdt1	Dpysl2	Axin1	Atp7b	Arl5c
Dhrs4	Ceacam1	Dpysl3	Axl	Atp8a1	Arl6
Dhrs7b	Ceacam11	Dram1	Azi2	Atp8a2	Arl6ip1
Dhrsx	Ceacam3	Dram2	Azin1	Atp8b1	Arl6ip4
Dhtkd1	Ceacam4	Drap1	B2m	Atp8b2	Arl6ip5
Dhx36	Cebpb	Dsc2	B3galnt1	Atp8b4	Arl6ip6
Dhx57	Cebpd	Dsn1	B3galt4	Atp9a	Arl8a
Dhx58	Cebpg	Dstyk	B3galt5	Atpaf1	Arl8b
Diaph1	Cel	Dtx2	B3gat2	Atrn	Armc1
Dimt1	Cela1	Dus3l	B3gat3	Atrnl1	Armc10
Dio1	Celf2	Dusp11	B3glct	Atrx	Armc5
Dio3	Celf4	Dusp16	B3gnt2	Atxn1	Armc6
Dis3l2	Celf5	Dusp26	B3gnt5	Atxn10	Armc7
Disp2	Cend1	Dusp9	B4galnt1	Atxn1l	Armc8
Dixdc1	Cenpi	Dvl1	B4galnt4	Atxn2	Armc9
Dlg1	Cenpl	Dvl2	B4galt1	Atxn3	Armcx1
Dlg2	Cenpm	Dynll2	B4galt3	Atxn7l1	Armcx2
Dlgap1	Cenpn	Dynlt1	B4galt4	Atxn7l2	Armcx3
Dlgap4	Cenpt	Dynlt3	B4galt5	Atxn7l3b	Armcx4
Dlx5	Cenpw	Dyrk2	B4galt7	Auh	Armcx6
Dmkn	Cep104	Dzip1	Baalc	Aunip	Armt1
Dmp1	Cep164	E2f8	Babam1	Aurka	Arnt
Dmrta2	Cep19	Eapp	Bace2	Aurkb	Arnt2
Dnaaf1	Cep350	Ebpl	Bach1	Aurkc	Arntl
Dnajb12	Cep57	Echdc1	Bag1	Aven	Arntl2
Dnajb2	Cep70	Echdc3	Bag3	Avil	Arpc1b
Dnajb6	Cep76	Ecm1	Bag4	Avl9	Arpc2
Dnajc27	Cep83	Edem1	Bag5	Avpi1	Arpc3
Dnajc6	Cerk	Ednra	Baiap2	Avpr1a	Arpc4
Dnm1	Cers2	Eef1d	Baiap2l1	Avpr1b	Arpc5
Dnm1l	Cers5	Eef2k	Bak1	Avpr2	Arpc5l
Dnmt1	Ces1e	Eepd1	Bambi	Axin1	Arpin
Dock10	Cfap36	Efcab11	Banp	Axl	Arpp21
Dock4	Cfd	Efcab2	Bap1	Azin2	Arr3
Dock8	Cfh	Efemp2	Bard1	B2m	Arrb1
Dock9	Cfhr1	Efhd1	Basp1	B3galnt1	Arrb2
Dok7	Cfl1	Efhd2	Batf	B3galt4	Arrdc1
Dpcd	Cfl2	Efnb1	Batf3	B3galt5	Arrdc2
Dpep1	Cfp	Efnb3	Baz1a	B3gat2	Arrdc4
Dpp4	Cggbp1	Efr3a	Baz1b	B3gat3	Arsa
Dpt	Cgm4	Eftud2	Baz2a	B3glct	Arsb
Dpysl2	Cgref1	Egfl6	Baz2b	B3gnt2	Arse
Dpysl3	Chac2	Egfl7	Bbox1	B3gnt5	Arsg
Dpysl4	Chaf1a	Ehbp1l1	Bbs1	B3gnt7	Arsi
Drap1	Chat	Ehd1	Bbs12	B4galnt1	Art1
Drgx	Chchd10	Ehd2	Bbs2	B4galnt4	Art2b
Dsc2	Chchd5	Ehd4	Bbs4	B4galt1	Art3
Dsp	Chchd6	Ehmt1	Bbs5	B4galt4	Art4
Dstyk	Chd1	Eid1	Bcan	B4galt6	Art5
Dusp1	Chd6	Eif1b	Bcap29	B4galt7	Arv1
Dusp11	Chgb	Eif2s3	Bcas1	Baalc	Arvcf
Dusp2	Chia	Eif3c	Bcas2	Babam1	Arx
Dusp3	Chic1	Eif3f	Bcas3	Bace2	Arxes2
Dusp5	Chic2	Eif3k	Bcat1	Bach1	Asah1
Dusp6	Chka	Eif3l	Bcat2	Bag1	Asah2
Dync1li2	Chl1	Eif4a1	Bche	Bag4	Asap1
Dynll2	Chmp1b	Eif4b	Bckdha	Bag5	Asap2
Dynlt3	Chmp5	Eif4e3	Bckdhb	Baiap2	Asap3
Dzip1	Chmp6	Eif4g1	Bckdk	Baiap2l1	Asb1
Dzip3	Chn1	Eif5a	Bcl10	Bak1	Asb11
E2f5	Chn2	Eif6	Bcl11a	Bambi	Asb12
Ebf1	Chodl	Elavl1	Bcl11b	Bank1	Asb13
Ebna1bp2	Chp1	Elf1	Bcl2	Bap1	Asb14
Ece1	Chpt1	Elf2	Bcl2a1	Bard1	Asb2
Ece2	Chrac1	Elk1	Bcl2l11	Barhl1	Asb3
Ech1	Chrd	Elk3	Bcl2l12	Basp1	Asb8
Eci1	Chrm4	Elk4	Bcl2l15	Batf	Ascc2
Ecm1	Chrna1	Ell	Bcl2l2	Batf2	Ascc3
Edem1	Chrna4	Ell2	Bcl3	Batf3	Ascl1
Edn2	Chrne	Elmod1	Bcl6	Baz1a	Ascl3
Ednrb	Chst10	Elof1	Bcl6b	Baz1b	Asf1a
Eef1d	Chst14	Elovl4	Bcl7a	Baz2a	Asf1b
Eef1e1	Chsy1	Elovl6	Bcl7c	Bbc3	Asgr1
Ef1	Churc1	Elovl7	Bcl9	Bbox1	Asgr2
Efcab1	Cic	Elp5	Bcl9l	Bbs1	Ash1l
Efcab11	Cipc	Emc2	Bclaf1	Bbs12	Ash2l
Efemp1	Cir1	Emc7	Bcor	Bbs2	Asic1
Efemp2	Cisd1	Emc9	Bcr	Bbs4	Asic2
Efnb3	Cisd2	Emilin1	Bdh2	Bbs5	Asic3
Efr3a	Cit	Emilin2	Bdkrb1	Bbs7	Asic4
Eftud2	Cited2	Eml1	Bdkrb2	Bcan	Asl
Egfl7	Cited4	Emp1	Begain	Bcas1	Asna1
Egr1	Ckap4	Emp2	Bend3	Bcas2	Asns
Egr2	Ckb	Emp3	Bend4	Bcas3	Asnsd1
Egr3	Cklf	Enah	Bend5	Bcat1	Aspa
Ehd2	Ckmt1b	Eng	Bend6	Bcat2	Aspg
Ehd4	Cks1b	Engase	Bet1	Bccip	Asph
Ehhadh	Cks2	Eno2	Bet1l	Bcdin3d	Asphd2
Eid1	Clcn1	Enoph1	Bex1	Bckdha	Aspm
Eif1ad	Clcn3	Enpp4	Bex1///Bex2	Bckdhb	Aspn
Eif2d	Cldn10	Entpd1	Bex2	Bcl10	Asprv1
Eif2s2	Cldn11	Epb4.1l5	Bex3	Bcl11a	Aspscr1
Eif3b	Cldn12	Epb41l1	Bex4	Bcl11b	Asrgl1
Eif3c	Cldn17	Epb41l2	Bfar	Bcl2	Ass1
Eif3g	Cldn2	Epb41l3	Bfsp1	Bcl2a1	Astn1
Eif3k	Cldn3	Epb42	Bfsp2	Bcl2l1	Astn2
Eif3l	Cldn4	Epg5	Bglap	Bcl2l11	Asun
Eif4a1	Cldn7	Epha2	Bgn	Bcl2l12	Asxl1
Eif4e2	Clec10a	Epha5	Bhlhb9	Bcl2l14	Asxl2
Eif4ebp1	Clec3b	Ephb2	Bhlhe22	Bcl2l2	Asxl3
Eif5a	Clec4a	Ephb6	Bhlhe40	Bcl3	Atad2
Eif6	Clec4a3	Epm2aip1	Bhlhe41	Bcl6b	Atad3a
Elavl1	Clec7a	Eps15	Bicdl1	Bcl7a	Atad5
Elavl3	Clic1	Eps15l1	Bid	Bcl7b	Atat1
Elavl4	Clic3	Erap1	Bik	Bcl9	Atcay
Elf1	Clic4	Erf	Bin1	Bclaf1	Atf1
Elk1	Clint1	Ergic3	Bin2	Bco1	Atf2
Elk3	Clip1	Erh	Bin3	Bcor	Atf3
Elk4	Clk2///Scamp3	Ermn	Birc2	Bcs1l	Atf4
Ell	Cln3	Erp44	Birc3	Bdh1	Atf5
Elmo3	Cln5	Esyt1	Birc5	Bdkrb1	Atf6
Elmod1	Cln6	Etf1	Birc7	Bdkrb2	Atf7ip
Elof1	Clpb	Etfb	Blcap	Bdnf	Atg10
Elovl5	Clps	Ethe1	Bles03	Bend3	Atg12
Elovl6	Clptm1l	Etnk1	Blm	Bend4	Atg13
Elovl7	Clstn1	Etnk2	Blnk	Bend5	Atg14
Emb	Clta	Etv5	Bloc1s4	Bend6	Atg16l1
Emc8	Cltb	Eva1b	Bloc1s5	Bet1	Atg16l2
Emc9	Cmpk2	Evi2b	Blvra	Bet1l	Atg2a
Emd	Cmtm3	Exoc1	Blzf1	Bex1	Atg2b
Emilin1	Cmtm5	Exoc2	Bmp1	Bex1///Bex2	Atg4b
Emilin2	Cmtm6	Exoc3l2	Bmp2	Bex2	Atg4d
Emp1	Cmtm7	Exosc4	Bmp2k	Bex3	Atg5
Emp2	Cmtm8	Ext1	Bmp4	Bex4	Atg7
Emp3	Cmya5	Ext2	Bmp5	Bfar	Atg9a
Enah	Cndp1	Extl2	Bmp6	Bfsp1	Atic
Eng	Cndp2	Eya3	Bmp7	Bfsp2	Atl1
Eno2	Cnep1r1	Ezh1	Bmper	Bgn	Atl2
Eno3	Cnga1	Ezh2	Bmpr1a	Bhlha15	Atl3
Enoph1	Cnga2	F13a1	Bmyc	Bhlhe22	Atmin
Enpp2	Cngb1	F8	Bnc2	Bhlhe40	Atoh8
Enpp3	Cnih4	F8a1	Bnip2	Bhlhe41	Atox1
Enpp4	Cnn1	Faap24	Bnip3l	Bicdl1	Atp10a
Ep400	Cnn2	Fabp12	Boc	Bid	Atp10d
Epb41	Cnn3	Fahd1	Bok	Bik	Atp11a
Epb41l1	Cnot10	Fahd2a	Bop1	Bin1	Atp11b
Epha2	Cnot2	Fam104a	Borcs5	Bin2	Atp12a
Epha5	Cnot6l	Fam105a	Borcs6	Bin3	Atp13a1
Epha8	Cnp	Fam107a	Borcs7	Birc2	Atp13a2
Ephb6	Cnppd1	Fam110a	Borcs8	Birc3	Atp13a5
Ephx1	Cnpy4	Fam110b	Bpgm	Birc5	Atp1a1
Ephx2	Cnr1	Fam111a	Bphl	Birc7	Atp1a2
Epm2aip1	Cnst	Fam120b	Bpifa5	Blcap	Atp1a3
Eps15l1	Cntn4	FAM120C	Bpnt1	Blk	Atp1b1
Erap1	Cntn6	Fam126b	Bptf	Blm	Atp1b2
Erbin	Cntnap1	Fam129b	Brap	Blnk	Atp1b3
Ercc6	Coa3///Zfp394	Fam134a	Brca1	Bloc1s2	Atp1b4
Ercc8	Coa5	Fam134b	Brca2	Bloc1s5	Atp23
Erf	Coch	Fam135a	Brcc3	Bloc1s6	Atp2a1
Erlec1	Cog2	Fam136a	Brd3	Blvra	Atp2a2
Ermn	Cog3	Fam155a	Brd4	Blzf1	Atp2a3
Ermp1	Cog4	Fam160b1	Brd7	Bmf	Atp2b1
Ero1a	Col11a1	Fam168a	Bri3bp	Bmp1	Atp2b2
Ero1b	Col12a1	Fam171a2	Brinp1	Bmp15	Atp2b3
Erp29	Col14a1	Fam171b	Brinp2	Bmp2	Atp2b4
Erp44	Col18a1	Fam180a	Brix1	Bmp2k	Atp2c1
Errfi1	Col1a1	Fam183b	Brms1l	Bmp4	Atp4a
Esf1	Col1a2	Fam185a	Brsk1	Bmp5	Atp4b
Esm1	Col2a1	Fam188a	Brwd1	Bmp6	Atp5a1
Esrra	Col3a1	Fam192a	Brwd3	Bmp7	Atp5b
Esyt1	Col4a1	Fam198b	Bscl2	Bmper	Atp5c1
Etf1	Col4a2	Fam20b	Bsg	Bmpr1a	Atp5d
Ethe1	Col5a2	Fam20c	Bsn	Bmpr2	Atp5e
Etnk1	Col6a1	Fam210b	Bspry	Bmt2	Atp5g3
Ets1	Col6a2	Fam212a	Bst1	Bmyc	Atp5h
Ets2	Col7a1	Fam213a	Bst2	Bnc1	Atp5i
Etv5	Col8a1	Fam234b	Btaf1	Bnc2	Atp5j
Eva1a	Col9a1	Fam46a	Btbd1	Bnip2	Atp5j2
Eva1b	Colec12	Fam53b	Btbd10	Bnip3	Atp5l
Eva1c	Commd2	Fam57b	Btbd11	Boc	Atp5o
Evc	Commd4	Fam60a	Btbd16	Bod1	Atp5s
Evi2a	Commd7	Fam63a	Btbd17	Bok	Atp5sl
Evi5	Commd9	Fam65a	Btbd2	Bola3	ATP6
Evpl	Comt	Fam69a	Btbd3	Borcs7	Atp6ap1l
Exoc2	Copa	Fam69b	Btbd6	Bphl	Atp6v0a1
Exoc3l4	Copg2	Fam83h	Btbd8	Bpifa2	Atp6v0a2
Exosc1	Coprs	Fam84a	Btbd9	Bpifb1	Atp6v0a4
Exosc3	Cops2	Fam89a	Btc	Bpifb2	Atp6v0b
Exosc4	Cops7a	Fam96a	Btd	Bpifb6	Atp6v0c
Ext1	Cops8	Farsb	Btf3l4///RGD1561589	Bpnt1	Atp6v0d1
Extl2	Coq2	Fasn	Btg1	Brap	Atp6v0e1
Eya2	Coq3	Fastkd2	Btg2	Brca1	Atp6v0e2
Eya3	Coq4	Fau	Btg3	Brca2	Atp6v1a
Ezh2	Coq8a	Fbl	Btk	Brd1	Atp6v1b1
Ezr	Coro1a	Fblim1	Btrc	Brd3	Atp6v1b2
F13a1	Coro1c	Fbln1	Bub1	Brd9	Atp6v1c1
F3	Coro2b	Fbln2	Bub1b	Bre	Atp6v1c2
F8	Cotl1	Fbn1	Bub3	Brf2	Atp6v1d
Fabp1	COX1	Fbxl22	Bud13	Bri3	Atp6v1e1
Fabp12	Cox16	Fbxl6	Bud31	Bri3bp	Atp6v1f
Fabp3	Cox18	Fbxo10	Bysl	Brinp1	Atp6v1g1
Fabp7	Cox20	Fbxo11	Bzw1	Brinp2	Atp6v1g2
Fads3	COX3///ATP6	Fbxo22	Bzw2	Brix1	Atp6v1h
Fah	Cox4i1	Fbxo33	C1galt1	Brms1l	Atp7a
Fahd2a	Cox5a	Fbxo42	C1qa	Brsk1	Atp7b
Fam105a	Cox5b	Fbxo44	C1qb	Brwd1	ATP8
Fam120b	Cox6a1	Fbxo9	C1qc	Brwd3	Atp8a1
Fam126b	Cox6a2	Fbxw2	C1ql1	Bscl2	Atp8a2
Fam129b	Cox6b2	Fbxw4	C1qtnf1	Bsg	Atp8b1
Fam134a	Cox7b	Fbxw5	C1qtnf2	Bsn	Atp8b2
Fam155a	Cox7c	Fcer1g	C1qtnf3	Bsnd	Atp8b4
Fam160b1	Cox8a	Fcgr1a	C1qtnf4	Bspry	Atp9a
Fam171b	Cp	Fcgr3a	C1qtnf5	Bst1	Atp9b
Fam175a	Cpa1	Fcho1	C1qtnf6	Bst2	Atpaf1
Fam179b	Cpa6	Fcho2	C1qtnf7	Btbd1	Atpaf2
Fam180a	Cpb2	Fchsd2	C1r	Btbd10	Atpif1
Fam183b	Cpe	Fcna	C1s	Btbd11	Atr
Fam198b	Cpeb3	Fdft1	C2cd2	Btbd16	Atraid
Fam204a	Cplx1	Fem1b	C2cd2l	Btbd17	Atrip
Fam207a	Cpm	Fem1c	C2cd4a	Btbd2	Atrn
Fam20b	Cpne2	Fermt3	C2cd5	Btbd3	Atrnl1
Fam210a	Cpne8	Fgd1	C3ar1	Btbd6	Atrx
Fam219b	Cpox	Fgf12	C5ar1	Btbd8	Atxn1
Fam21c	Cps1	Fgf13	C6	Btbd9	Atxn10
Fam60a	Cpsf2	Fgfr1	Ca5b	Btc	Atxn1l
Fam63a	Cpsf6	Fgfr2	Cab39	Btd	Atxn2
Fam63b	Cpsf7	Fgfr3	Cables1	Btf3l4///RGD1561589	Atxn3
Fam69a	Cpt1b	Fhdc1	Cables2	Btg1	Atxn7l1
Fam69b	Cptp	Fhl3	Cabp1	Btg2	Atxn7l2
Fam83h	Cpz	Filip1l	Cabyr	Btg3	Atxn7l3
Fam84a	Cr1l	Fis1	Cachd1	Btk	Atxn7l3b
Fam96a	Cr2	Fkbp15	Cacna1a	Btnl8	Auh
Fam96b	Crabp1	Fkbp2	Cacna1b	Btnl9	Aunip
Fancc	Creb3l4	Fkbp5	Cacna1c	Btrc	Aup1
Farsa	Crebbp	Fkbp8	Cacna1d	Bub1	Aurka
Farsb	Crebl2	Flcn	Cacna1g	Bub1b	Aurkb
Fasn	Crebrf	Fli1	Cacna2d1	Bub3	Aurkc
Fau	Crebzf	Flna	Cacna2d3	Bzw1	Aven
Fbl	Creg1	Flot1	Cacnb1	Bzw2	Avil
Fblim1	Crem	Flt1	Cacnb2	C1galt1	Avl9
Fbln2	Crh	Flywch1	Cacnb4	C1qa	Avpi1
Fbn1	Crhbp	Fmn1	Cacng2	C1qb	Avpr1a
Fbp2	Crip1	Fmnl3	Cacng3	C1qc	Avpr1b
Fbxo10	Cript	Fmo4	Cacng7	C1ql1	Avpr2
Fbxo11	Crisp2	Fmo5	Cactin	C1ql3	Axin1
Fbxo21	Crispld2	Fnbp1	Cacul1	C1qtnf1	Axl
Fbxo22	Crlf1	Fnbp4	Cad	C1qtnf2	Azgp1
Fbxo25	Crtac1	Fndc3b	Cadm1	C1qtnf3	Azi2
Fbxo33	Cryab	Fndc5	Cadm3	C1qtnf4	Azin1
Fbxo42	Cryba1	Fnip2	Cadps	C1qtnf6	Azin2
Fbxo44	Crybb1	Folr1	Cadps2	C1qtnf7	B2m
Fbxo9	Crybb2	Folr2	Cahm	C1r	B3galnt1
Fbxw5	Crygc	Fos	Calb1	C1s	B3galt4
Fcer1g	Crygn	Foxc2	Calb2	C2cd2	B3galt5
Fcgr1a	Crym	Foxd4	Calca	C2cd2l	B3gat1
Fcgr2b	Csap1	Foxk2	Calcr	C2cd3	B3gat2
Fcgr3a	Csdc2	Foxo3	Cald1	C2cd4a	B3gat3
Fcho1	Csde1	Foxo6	Calhm2	C2cd5	B3glct
Fcho2	Csf1r	Foxp4	Calm1	C3ar1	B3gnt2
Fdxr	Csf2ra	Foxq1	Calm2	C5ar1	B3gnt5
Fer	Csf2rb	Fpgs	Calm2///Calm3///Calm1	C6	B3gnt7
Fermt3	Csk	Frmd8	Calml4	C8b	B3gntl1
Fez1	Csnk1a1	Frrs1	Calr	Ca5b	B4galnt1
Fga	Csnk2a1	Frrs1l	Calr4	Cab39	B4galnt4
Fgf12	Csnk2a2	Ftcd	Calu	Cables1	B4galt1
Fgf16	Cspg4	Fth1	Caly	Cables2	B4galt2
Fgf5	Csrnp1	Fthl17	Camk1	Cabp1	B4galt3
Fgf9	Csrnp2	Fubp1	Camk1g	Cabyr	B4galt4
Fgfr1	Csrp1	Fundc1	Camk2a	Cacna1a	B4galt5
Fgfr1op	Cst3	Fundc2	Camk2b	Cacna1b	B4galt6
Fgfr3	Csta	Fuom	Camk2d	Cacna1c	B4galt7
Fgl2	Cstb	Fxyd1	Camk2n1	Cacna1d	Baalc
Fhl2	Cstf3	Fxyd5	Camk2n2	Cacna1f	Babam1
Fhl3	Ctbp2	Fxyd7	Camk4	Cacna1h	Bace2
Fibin	Ctbs	Fyn	Camkk1	Cacna1i	Bach1
Fis1	Ctc1	Fyttd1	Camkmt	Cacna2d1	Bad
Fjx1	Ctdnep1	Fzd6	Camkv	Cacna2d3	Bag1
Fkbp11	Ctdsp1	Fzd7	Camp	Cacnb1	Bag2
Fkbp1a	Ctdsp2	Fzr1	Camsap1	Cacnb2	Bag3
Fkbp2	Ctgf	Gabarap	Camsap2	Cacnb4	Bag4
Fkbp5	Cth	Gabbr1	Camsap3	Cacng2	Bag5
Fkbp8	Cthrc1	Gadd45gip1	Camta1	Cacng3	Bag6
Flna	Ctla2a	Galk1	Camta2	Cacng4	Bahd1
Flnc	Ctla4	Galnt13	Cand1	Cacng6	Baiap2
Flot1	Ctnna1	Galnt16	Cand2	Cacng7	Baiap2l1
Flot2	Ctnnal1	Ganc	Cant1	Cacul1	Bak1
Flt1	Ctnnb1	Gapdh	Canx	Cad	Bambi
Flywch1	Ctnnbip1	Gar1	Cap1	Cadm1	Banf1
Fmc1	Ctnnd1	Garnl3	Cap2	Cadm3	Bank1
Fmo5	Ctnnd2	Gars	Capg	Cadps	Banp
Fmod	Ctps2	Gas2	Capn1	Cadps2	Bap1
Fn1	Ctsa	Gas2l3	Capn13	Cahm	Bard1
Fn3k	Ctsb	Gas5	Capn15	Calb1	Barhl1
Fnbp1	Ctsc	Gas6	Capn2	Calb2	Basp1
Fndc1	Ctsd	Gata3	Capn3	Calca	Batf
Fndc3b	Ctsk	Gba2	Capn6	Calcrl	Batf2
Fndc5	Ctsl	Gca	Capns1	Cald1	Batf3
Fnip1	Ctsm	Gcdh	Caprin1	Calhm2	Baz1a
Fnip2	Ctsz	Gcn1l1	Caprin2	Calm1	Baz1b
Focad	Cttnbp2	Gcs1	Capza1	Calm2	Baz2a
Fos	Cttnbp2nl	Gda	Capzb	Calm2///Calm3///Calm1	Baz2b
Fosl1	Cuedc2	Gdap1l1	Car1	Calml4	Bbc3
Fosl2	Cul1	Gemin6	Car10	Calr	Bbox1
Foxa2	Cul3	Gfpt1	Car11	Calr3	Bbs1
Foxa3	Cutc	Gga2	Car14	Calr4	Bbs12
Foxc2	Cux1	Ggnbp2	Car2	Calu	Bbs2
Foxe3	Cuzd1	Ggps1	Car3	Caly	Bbs4
Foxk2	Cwc25	Ggt7	Car6	Camk1	Bbs5
Foxn3	Cx3cr1	Ggta1	Car7	Camk1g	Bbs7
Foxq1	Cxcl1	Ghitm	Car8	Camk2a	Bbs9
Fpgs	Cxcl11	Gigyf2	Car9	Camk2b	Bcan
Fra10ac1	Cxcl12	Gins1	Card10	Camk2d	Bcap29
Frmd5	Cxcl14	Gins4	Card11	Camk2n1	Bcar1
Frmd8	Cxcl16	Git2	Card14	Camk2n2	Bcas1
Frrs1l	Cxcl3	Gja1	Card19	Camk4	Bcas2
Fryl	Cxcr2	Gjb2	Card9	Camkk1	Bcas3
Frzb	Cxcr3	Gjc1	Carf	Camkmt	Bcat1
Fst	Cxcr4	Gk	Carhsp1	Camkv	Bcat2
Fstl3	Cxxc5	Gkap1	Carm1	Camp	Bccip
Ftcd	Cyb561	Gldc	Carmil1	Camsap1	Bcdin3d
Fubp1	Cyb5a	Glipr1	Carmil2	Camsap2	Bche
Fundc1	Cyb5b	Glmp	Carmil3	Camsap3	Bckdha
Fuom	Cyb5r3	Glrx3	Cars	Camta1	Bckdhb
Furin	Cyb5r4	Glrx5	Cars2	Camta2	Bckdk
Fxyd5	Cyba	Gltp	Cartpt	Cand1	Bcl10
Fxyd7	Cybb	Gltscr1l	Casc1	Cand2	Bcl11a
Fzd6	Cyfip2	Gltscr2	Casc4	Cant1	Bcl11b
Fzr1	Cygb	Gm2a	Casd1	Canx	Bcl2
G3bp1	Cyp17a1	Gmcl1	Cask	Cap1	Bcl2a1
G3bp2	Cyp1b1	Gmfg	Caskin1	Cap2	Bcl2l1
G6pc3	Cyp26b1	Gmppa	Caskin2	Capg	Bcl2l11
Gaa	Cyp2c11	Gmppb	Casp1	Capn1	Bcl2l12
Gab1	Cyp2c13	Gmpr2	Casp12	Capn13	Bcl2l14
Gabbr1	Cyp2d4	Gmps	Casp2	Capn15	Bcl2l15
Gabbr2	Cyp2g1	Gnaq	Casp3	Capn3	Bcl2l2
Gabra4	Cyp3a2	Gnb2	Casp4	Capn5	Bcl3
Gabra5	Cyp3a23/3a1	Gnb5	Casp6	Capn8	Bcl6
Gabrb1	Cyp3a9	Gng12	Casp7	Capns1	Bcl6b
Gabrb2	Cyp46a1	Gng3	Casp8	Caprin1	Bcl7a
Gabrg2	Cyp4a1	Gng8	Casp8ap2	Caprin2	Bcl7b
Gabrg3	Cyp4a3	Gngt1	Casr	Capza1	Bcl7c
Gadd45a	Cyp4f17	Gnl3l	Cast	Capza2	Bcl9
Gadd45b	Cyp4v3	Gnpda1	Casz1	Capzb	Bcl9l
Gal	Cyp51	Gpatch2	Catsper2	Car1	Bclaf1
Galk1	Cyp7a1	Gpatch4	Cav1	Car10	Bco1
Galnt11	Cyr61	Gpbp1	Cav3	Car11	Bcor
Galnt13	Cys1	Gpc5	Cbarp	Car12	Bcr
Gamt	Cystm1	Gpc6	Cbfa2t2	Car14	Bcs1l
Gap43	CYTB	Gpha2	Cbfb	Car2	Bdh1
Gapdh	Cytip	Gpihbp1	Cbl	Car3	Bdh2
Gar1	Cytl1	Gpld1	Cblb	Car4	Bdkrb1
Gars	Cyyr1	Gpm6b	Cbln1	Car6	Bdkrb2
Gart	Dab2	Gpnmb	Cbln2	Car7	Bdnf
Gas2	Dact3	Gpr108	Cbr3	Car8	Bdp1
Gas5	Dao	Gpr155	Cbs	Car9	Bean1
Gas6	Dap	Gpr158	Cbwd1	Card10	Becn1
Gas7	Dap3	Gpr68	Cbx1	Card11	Begain
Gba2	Dars2	Gpr88	Cbx6	Card14	Bend3
Gbp2	Dazap1	Gprc5b	Cbx7	Card19	Bend4
Gch1	Dazap2	Gprin1	Cby1	Card9	Bend5
Gcn1l1	Dbi	Gprin3	Cc2d2a	Carf	Bend6
Gcnt2	Dbn1	Gpsm2	Ccar1	Carhsp1	Bet1
Gcs1	Dbndd1	Gpsm3	Ccbe1	Carmil1	Bet1l
Gda	Dbndd2	Grcc10	Ccdc102a	Carmil3	Bex1
Gde1	Dbp	Grhpr	Ccdc106	Cars	Bex2
Gdnf	Dcaf12	Gria3	Ccdc107	Cars2	Bex3
Gemin6	Dcaf15	Grik1	Ccdc112	Cartpt	Bex4
Get4	Dcaf17	Grk6	Ccdc113	Casc1	Bfar
Ggct	Dcaf6	Grpel2	Ccdc117	Casc4	Bfsp1
Ggta1	Dcaf8	Grtp1	Ccdc125	Casd1	Bfsp2
Ghitm	Dcakd	Gsap	Ccdc126	Cask	Bglap
Gimap6	Dck	Gsg1l	Ccdc127	Caskin1	Bgn
Gins4	Dclk1	Gsn	Ccdc134	Caskin2	Bhlha15
Gipc1	Dclk2	Gsr	Ccdc136	Casp1	Bhlhb9
Git1	Dcn	Gstm4	Ccdc141	Casp12	Bhlhe22
Gja1	Dctn2	Gstm5	Ccdc149	Casp16	Bhlhe40
Gja5	Dctn4	Gsto1	Ccdc153	Casp2	Bhlhe41
Gjb2	Dctpp1	Gstt3	Ccdc163	Casp3	Bicd2
Gjb6	Dcun1d2	Gstz1	Ccdc17	Casp4	Bicdl1
Gjc1	Dcun1d4	Gtdc1	Ccdc174	Casp6	Bid
Gkap1	Ddb1	Gtf2a2	Ccdc177	Casp7	Bik
Glipr1	Ddc	Gtf2e1	Ccdc180	Casp8	Bin1
Glra2	Ddit3	Gtf2h1	Ccdc181	Casp8ap2	Bin2
Glrx	Ddr2	Gtf2h2	Ccdc184	Casp9	Bin2a
Gls2	Ddx1	Gtf2h4	Ccdc186	Casq2	Bin3
Gltscr1l	Ddx21	Gtf2h5	Ccdc22	Casr	Birc2
Glud1	Ddx31	Gtf3a	Ccdc28a	Cast	Birc3
Glul	Ddx41	Gtf3c3	Ccdc28b	Casz1	Birc5
Gm2a	Ddx49	Gtf3c6	Ccdc3	Catsper2	Birc7
Gmfg	Ddx5	Gucd1	Ccdc30	Cav1	Bivm
Gmnn	Ddx50	H1fx	Ccdc32	Cav3	Blcap
Gmpr	Ddx52	H2afy2	Ccdc34	Cbarp	Bles03
Gmpr2	Ddx54	H3f3b	Ccdc43	Cbfa2t3	Blk
Gmps	Deaf1	Habp4	Ccdc53	Cbfb	Blm
Gnai1	Decr1	Hao2	Ccdc58	Cbl	Blnk
Gnai1///Gnai3	Decr2	Hars	Ccdc65	Cblb	Bloc1s2
Gnas	Degs2	Haus5	Ccdc68	Cbln1	Bloc1s3
Gnat1	Dennd2c	Hba2///Hba1	Ccdc69	Cbln2	Bloc1s4
Gnb1	Dennd2d	Hbs1l	Ccdc78	Cbr3	Bloc1s5
Gnb2	Dennd5a	Hcls1	Ccdc8	Cbs	Bloc1s6
Gnb5	Dennd6a	Hdac7	Ccdc80	Cbx1	Blvra
Gng8	Dera	Hdgf	Ccdc81	Cbx5	Blzf1
Gngt1	Deup1	Hdlbp	Ccdc85b	Cbx6	Bmf
Gnpda1	Dexi	Hebp1	Ccdc85c	Cbx7	Bmp1
Gnpnat1	Dgat2	Hectd1	Ccdc86	Cby1	Bmp15
Golga1	Dgcr2	Hecw2	Ccdc88a	Cc2d2a	Bmp2
Golgb1	Dgkb	Helt	Ccdc88c	Ccar1	Bmp2k
Golm1	Dgkd	Hemgn	Ccdc9	Ccbe1	Bmp3
Golt1a	Dgkg	Herc3	Ccdc92	Ccdc102a	Bmp4
Golt1b	Dgkz	Herpud1	Ccdc93	Ccdc105	Bmp5
Gpam	Dhcr24	Hes5	Ccdc96	Ccdc107	Bmp6
Gpc2	Dhcr7	Hexa	Cchcr1	Ccdc113	Bmp7
Gpc3	Dhfr	Hexb	Cck	Ccdc115	Bmper
Gpc5	Dhrs3	Hexdc	Cckbr	Ccdc120	Bmpr1a
Gpd1	Dhrs4	Hexim2	Ccl11	Ccdc124	Bmpr2
Gpihbp1	Dhrs7b	Hgsnat	Ccl2	Ccdc125	Bmt2
Gpld1	Dhrsx	Hhatl	Ccl20	Ccdc126	Bmyc
Gpm6b	Dhtkd1	Hic1	Ccl21	Ccdc127	Bnc1
Gpnmb	Dhx15	Hist1h1c	Ccl24	Ccdc136	Bnc2
Gpr107	Dhx36	Hist1h2bh	Ccl27	Ccdc141	Bnip2
Gpr108	Dhx57	Hist1h4a	Ccl3	Ccdc149	Bnip3
Gpr150	Dimt1	Hist1h4b	Ccl4	Ccdc153	Bnip3l
Gpr155	Dio1	Hist1h4m	Ccl5	Ccdc163	Boc
Gpr182	Diras3	Hmg20a	Ccl6	Ccdc167	Bod1
Gpr4	Dirc2	Hmgb1	Ccl7	Ccdc17	Bok
Gprc5a	Dis3l2	Hmgcl	Ccl9	Ccdc177	Bola3
Gprc5b	Disp2	Hmgcr	Ccna1	Ccdc180	Bop1
Gprin1	Dixdc1	Hmgcs2	Ccna2	Ccdc181	Borcs5
Gprin3	Dlc1	Hmgn1	Ccnb1	Ccdc184	Borcs6
Gps2	Dlg1	Hmgn2	Ccnb2	Ccdc186	Borcs7
Gpsm2	Dlg5	Hmgn3	Ccnc	Ccdc187	Borcs8
Gpsm3	Dlgap1	Hmgn5b	Ccnd1	Ccdc22	Bpgm
Gpx1	Dlgap4	Hn1	Ccnd2	Ccdc24	Bphl
Gpx2	Dlk1	Hnmt	Ccnd3	Ccdc25	Bpifa2
Gpx3	Dlst	Hnrnpa2b1	Ccne1	Ccdc28a	Bpifa2f
Gramd1b	Dlx5	Hnrnpa3	Ccne2	Ccdc28b	Bpifa5
Gramd3	Dmxl2	Hnrnpl	Ccnf	Ccdc3	Bpifb1
Grb14	Dnah7	Hnrnpul1	Ccng1	Ccdc30	Bpifb2
Grhpr	Dnaja4	Hoga1	Ccng2	Ccdc34	Bpifb4
Gria2	Dnajb11	Homer2	Ccnjl	Ccdc43	Bpifb6
Gria3	Dnajb12	Homer3	Ccnl2	Ccdc51	Bpnt1
Gria4	Dnajb2	Hopx	Ccnt2	Ccdc53	Bptf
Grik2	Dnajb6	Hoxb6	Ccp110	Ccdc58	Brap
Grik4	Dnajc12	Hoxd10	Ccpg1	Ccdc6	Brca1
Grin1	Dnajc19	Hoxd4	Ccr1	Ccdc61	Brca2
Grin2a	Dnajc21	Hoxd8	Ccr2	Ccdc65	Brcc3
Grin2c	Dnajc24	Hoxd9	Ccr6	Ccdc69	Brd1
Grin3a	Dnajc27	Hpcal4	Ccrl2	Ccdc77	Brd2
Grk4	Dnajc4	Hpdl	Ccsap	Ccdc8	Brd3
Grk6	Dnajc5	Hps1	Ccser2	Ccdc80	Brd4
Grm3	Dnajc6	Hpse	Cct2	Ccdc81	Brd7
Grm4	Dnase1	Hrasls	Cct3	Ccdc85b	Brd9
Grn	Dnase1l1	Hs1bp3	Cct4	Ccdc85c	Bre
Grpel1	Dnase2	Hsbp1	Cct5	Ccdc86	Brf2
Grpel2	Dnm1	Hsbp1l1	Cct6a	Ccdc88a	Bri3
Grpr	Dnm2	Hsdl2	Cct7	Ccdc88c	Bri3bp
Grtp1	Dnmt1	Hspa12a	Cct8	Ccdc9	Brinp1
Gsap	Doc2b	Hspb3	Ccz1b	Ccdc90b	Brinp2
Gsg1l	Doc2g	Hspbap1	Cd14	Ccdc92	Brix1
Gsr	Dock7	Hspbp1	Cd163	Ccdc93	Brms1
Gsta1	Dock8	Htatip2	Cd164l2	Ccdc96	Brms1l
Gsta3	Dock9	Htr2c	Cd180	Ccdc97	Brsk1
Gsta4	Dok3	Htra3	Cd1d1	Cchcr1	Brwd1
Gstcd	Dok7	Hunk	Cd2	Cck	Brwd3
Gstk1	Dot1l	Huwe1	Cd200	Ccl11	Bscl2
Gstm7	Dpcd	Hvcn1	Cd200r1	Ccl19	Bsg
Gstt3	Dpep2	Iah1	Cd209f	Ccl2	Bsn
Gtf2h2	Dph3	Iars	Cd24	Ccl20	Bsnd
Gtf2h5	Dph5	Ibsp	Cd244	Ccl21	Bspry
Gtf3a	Dpm1	Icam2	Cd247	Ccl22	Bst1
Gtf3c6	Dpp4	Id4	Cd276	Ccl24	Bst2
Gucy1a3	Dpp7	Idh2	Cd2ap	Ccl27	Btaf1
Gucy1b2	Dpysl2	Idh3a	Cd2bp2	Ccl28	Btbd1
Gucy1b3	Dpysl3	Idh3B	Cd300a	Ccl3	Btbd10
Gucy2f	Dram1	Idi1	Cd33	Ccl4	Btbd11
Gucy2g	Dram2	Ier2	Cd37	Ccl5	Btbd16
Gzma	Drap1	Ier3	Cd3d	Ccl6	Btbd17
H19	Drd3	Ier5	Cd3e	Ccl7	Btbd2
H1fx	Drgx	Ier5l	Cd3eap	Ccl9	Btbd3
H3f3b	Drosha	Iffo1	Cd3g	Ccna1	Btbd6
Habp4	Dsc2	Iffo2	Cd40	Ccna2	Btbd7
Hacd3	Dspp	Ifi27	Cd44	Ccnb1	Btbd8
Hal	Dstn	Ifi30	Cd46	Ccnb2	Btbd9
Hamp	Dstyk	Ifi47	Cd47	Ccnc	Btc
Hba-a1	Dtd1	Ifitm1	Cd48	Ccnd1	Btd
Hba1	Dtwd1	Ifitm2	Cd52	Ccnd2	Btf3
Hba2///Hba1	Dtwd2	Ifitm3	Cd53	Ccnd3	Btg1
Hbe2///Hbg1	Dtx2	Ifnar1	Cd55	Ccnf	Btg2
Hbegf	Dtx3l	Ifnar2	Cd59	Ccng1	Btg3
Hck	Dtymk	Ifngr1	Cd5l	Ccng2	Btk
Hcrt	Dusp1	Ifngr2	Cd63	Ccnl2	Btnl8
Hdac1	Dusp11	Ift172	Cd68	Ccnt2	Btnl9
Hdac4	Dusp18	Ift22	Cd69	Ccny	Btrc
Hdhd2	Dusp2	Ift43	Cd7	Ccp110	Bub1
Hdlbp	Dusp26	Ift80	Cd82	Ccpg1	Bub1b
Heatr5a	Dusp4	Igdcc3	Cd83	Ccpg1os	Bub3
Hebp1	Dusp6	Igf1	Cd86	Ccr1	Bud13
Heca	Dusp9	Igf1r	Cd8a	Ccr2	Bud31
Hemk1	Dvl1	Igf2bp3	Cd8b	Ccr5	Bves
Hes1	Dync1i1	Igfbp5	Cd93	Ccr6	Bysl
Hes5	Dync1li2	Igfbp7	Cd99l2	Ccrl2	Bzw1
Hexim2	Dync2h1	Ighmbp2	Cdadc1	Ccsap	Bzw2
Hgsnat	Dynll2	Igsf3	Cdc14a	Ccser2	C1galt1
Hhatl	Dynlrb1	Igsf8	Cdc16	Cct4	C1galt1c1
Hibch	Dynlt1	Ihh	Cdc20	Cct8	C1qa
Hic1	Dynlt3	Ikbke	Cdc23	Ccz1b	C1qb
Hif1a	Dyrk1a	Il10rb	Cdc25a	Cd14	C1qc
Hint3	Dyrk2	Il13ra1	Cdc25b	Cd163	C1ql1
Hip1r	Dyx1c1	Il17d	Cdc27	Cd164	C1ql3
Hipk3	Dzip1	Il17ra	Cdc37l1	Cd164l2	C1qtnf1
Hist1h1t	Dzip3	Il17re	Cdc42	Cd180	C1qtnf2
Hist1h2aa	E2f8	Il18bp	Cdc42ep1	Cd1d1	C1qtnf3
Hist1h2af	Ebf1	Il22ra2	Cdc42ep2	Cd2	C1qtnf4
Hist1h4a	Ebpl	Il2rg	Cdc42ep3	Cd200	C1qtnf5
Hist3h2a	Ece1	Il4r	Cdc42ep5	Cd200r1	C1qtnf6
Hk2	Echdc1	Ilk	Cdc42se1	Cd200r1l	C1qtnf7
Hlf	Eci1	Ilvbl	Cdc45	Cd209b	C1r
Hmg1l1///Hmgb1	Eci3	Impact	Cdc5l	Cd209f	C1s
Hmga1	Ecm1	Impad1	Cdca2	Cd22	C2
Hmgb1	Edem1	Inafm1	Cdca3	Cd24	C2cd2
Hmgcl	Ednra	Ing2	Cdca4	Cd244	C2cd2l
Hmgcr	Ednrb	Ino80b	Cdca7	Cd247	C2cd3
Hmgcs1	Eef1d	Inpp5a	Cdca7l	Cd248	C2cd4a
Hmgn1	Eef1e1	Inpp5j	Cdca8	Cd276	C2cd5
Hmgn2	Eef1g	Inppl1	Cdh1	Cd28	C3
Hmgn3	Eef2k	Insig1	Cdh10	Cd2ap	C3ar1
Hmox1	Eepd1	Insig2	Cdh11	Cd2bp2	C5ar1
Hmox2	Ef1	Ints5	Cdh12	Cd300a	C6
Hn1	Efcab1	Ints6	Cdh13	Cd302	C8a
Hnmt	Efcab2	Invs	Cdh15	Cd33	C8b
Hnrnpa1	Efemp1	Ipmk	Cdh17	Cd37	C8g
Hnrnpa2b1	Efemp2	Ipo11	Cdh2	Cd3d	Ca5b
Hnrnpa3	Efhd1	Ipo5	Cdh20	Cd3e	Caap1
Hnrnpab	Efhd2	Iqgap1	Cdh22	Cd3e-ps1	Cab39
Hnrnpc	Efna1	Iqgap3	Cdh23	Cd3eap	Cables1
Hnrnpd	Efnb3	Iqsec1	Cdh7	Cd3g	Cables2
Hnrnpf	Efr3a	Iqsec2	Cdh8	Cd4	Cabp1
Hoga1	Eftud2	Irak1bp1	Cdhr1	Cd40	Cabyr
Homer3	Egfl7	Irak2	Cdhr2	Cd44	Cachd1
Hopx	Egln3	Irf2bp2	Cdhr4	Cd46	Cacna1a
Hoxb6	Egr1	Irf2bpl	Cdhr5	Cd47	Cacna1b
Hoxd10	Egr3	Irf5	Cdip1	Cd48	Cacna1c
Hoxd3	Egr4	Irf7	Cdk1	Cd52	Cacna1d
Hoxd8	Ehbp1l1	Irf9	Cdk12	Cd53	Cacna1f
Hp1bp3	Ehd1	Isca1	Cdk13	Cd55	Cacna1g
Hpcal4	Ehd2	Islr	Cdk14	Cd59	Cacna1h
Hpdl	Ehd4	Isoc1	Cdk17	Cd5l	Cacna1i
Hpn	Ehhadh	Isyna1	Cdk18	Cd6	Cacna2d1
Hps4	Eid1	Itfg1	Cdk2	Cd63	Cacna2d3
Hpse	Eif1ad	Itga3	Cdk20	Cd68	Cacnb1
Hrasls	Eif2d	Itga4	Cdk2ap1	Cd69	Cacnb2
Hrh3	Eif2s2	Itga6	Cdk2ap2	Cd7	Cacnb4
Hrk	Eif2s3	Itgal	Cdk4	Cd74	Cacng1
Hsd17b13	Eif3c	Itgb5	Cdk5	Cd79b	Cacng2
Hsd17b7	Eif3f	Itgb6	Cdk5rap2	Cd80	Cacng3
Hsd3b3///Hsd3b1	Eif3g	Itgbl1	Cdk5rap3	Cd82	Cacng4
Hspa12a	Eif3k	Itpa	Cdk7	Cd86	Cacng6
Hspa1a	Eif3l	Jak2	Cdkl2	Cd8a	Cacng7
Hspa1b///Hspa1a	Eif4a1	Jakmip1	Cdkl4	Cd8b	Cactin
Hspa5	Eif4a2	Jam3	Cdkl5	Cd93	Cacul1
Hspb1	Eif4b	Jaml	Cdkn1a	Cd96	Cacybp
Hspb8	Eif4e2	Jarid2	Cdkn1b	Cd99l2	Cad
Hspbap1	Eif4ebp1	Jazf1	Cdkn1c	Cdadc1	Cadm1
Hspbp1	Eif4g1	Jchain	Cdkn2a	Cdc14a	Cadm3
Htatip2	Eif4g2	Jkamp	Cdkn2aip	Cdc14b	Cadps
Htr2c	Eif5a	Jmjd1c	Cdkn2aipnl	Cdc16	Cadps2
Htr7	Eif6	Jph3	Cdkn2c	Cdc20	Cahm
Htra1	Elavl1	Jsrp1	Cdkn3	Cdc23	Calb1
Htra3	Elavl4	Kank2	Cdo1	Cdc25a	Calb2
Hus1	Elf1	Kars	Cds1	Cdc25b	Calca
Hvcn1	Elf2	Kat2b	Cdt1	Cdc27	Calcb
Iapp	Elk3	Kat7	Cdv3	Cdc37	Calcoco1
Ibsp	Elk4	Kazn	Cdyl	Cdc37l1	Calcr
Icam1	Ell	Kcnab1	Cdyl2	Cdc42	Calcrl
Icam2	Elmo3	Kcnab3	Ceacam1	Cdc42ep1	Cald1
Id1	Elmod1	Kcnc3	Ceacam4///Ceacam1	Cdc42ep2	Calhm2
Id4	Elof1	Kcng2	Cebpa	Cdc42ep3	Calm1
Ier2	Elovl1	Kcnip1	Cebpb	Cdc42ep5	Calm2
Ier3	Elovl2	Kcnj11	Cebpd	Cdc42se1	Calml4
Ier5	Elovl4	Kcnk1	Cebpe	Cdc45	Calr
Ier5l	Elovl5	Kcnk6	Cebpg	Cdca2	Calr3
Iffo1	Elovl6	Kcnn4	Cebpz	Cdca3	Calr4
Iffo2	Elovl7	Kctd10	Cecr6	Cdca4	Calu
Ifi30	Elp3	Kctd12	Cela1	Cdca7	Caly
Ifi47	Emb	Kctd13	Cela3b	Cdca7l	Camk1
Ifitm1	Emc8	Kctd17	Celf1	Cdca8	Camk1g
Ifitm10	Emc9	Kctd3	Celf2	Cdcp1	Camk2a
Ifitm2	Emid1	Kctd4	Celf3	Cdh1	Camk2b
Ifitm3	Emilin1	Kctd9	Celf4	Cdh10	Camk2d
Ifnar1	Emilin2	Kdelc1	Celf5	Cdh11	Camk2g
Ifnar2	Emilin3	Kdelc2	Celsr2	Cdh12	Camk2n1
Ifngr1	Eml1	Kdelr1	Celsr3	Cdh13	Camk2n2
Ifngr2	Emp1	Kdelr2	Cemip	Cdh15	Camk4
Ifrd1	Emp2	Kdelr3	Cenpa	Cdh17	Camkk1
Ift172	Emp3	Kdm4b	Cenpe	Cdh2	Camkmt
Ift46	Enah	Kdm5a	Cenpf	Cdh20	Camkv
Ift80	Enc1	Kdm5b	Cenpi	Cdh22	Camp
Igdcc3	Endod1	Kdm8	Cenpj	Cdh23	Camsap1
Igf1	Eng	Kdsr	Cenpk	Cdh3	Camsap2
Igf2	Engase	Keap1	Cenpl	Cdh7	Camsap3
Igfbp3	Eno2	Kel	Cenpm	Cdh8	Camta1
Igfbp5	Eno3	Khnyn	Cenpn	Cdhr1	Camta2
Ighe	Enoph1	Kidins220	Cenpq	Cdhr2	Cand1
Igkc	Enpep	Kif11	Cenpt	Cdhr4	Cand2
Igsf3	Enpp1	Kif12	Cenpu	Cdhr5	Cant1
Igsf6	Enpp2	Kif18b	Cenpw	Cdip1	Canx
Ihh	Enpp3	Kif1bp	Cep104	Cdk1	Cap1
Il10rb	Enpp4	Kif20a	Cep126	Cdk10	Cap2
Il13	Enpp6	Kif22	Cep128	Cdk11b	Capg
Il13ra1	Ensa	Kif2a	Cep135	Cdk13	Capn1
Il17ra	Entpd1	Kif5a	Cep152	Cdk14	Capn13
Il1a	Entpd2	Kif5c	Cep164	Cdk17	Capn15
Il1b	Ep300	Kifap3	Cep170b	Cdk18	Capn2
Il1r2	Ep400	Kifc2	Cep19	Cdk2	Capn3
Il22ra2	Epb41	Kiz	Cep250	Cdk20	Capn5
Il2rg	Epb41l1	Klc1	Cep295	Cdk2ap1	Capn6
Il3	Epb41l2	Klc2	Cep41	Cdk4	Capn8
Il33	Epb41l3	Klf3	Cep44	Cdk5	Capns1
Il4	Epc1	Klf4	Cep57l1	Cdk5rap1	Caprin1
Il4r	Epha3	Klf7	Cep70	Cdk5rap2	Caprin2
Il6	Epha4	Klhdc1	Cep76	Cdk7	Capza1
Il6st	Epha5	Klhdc8a	Cep78	Cdk9	Capza2
Il7	Epha8	Klhl11	Cep95	Cdkl2	Capzb
Ilkap	Ephb6	Klhl12	Cercam	Cdkl4	Car1
Imp3	Ephx2	Klhl2	Cerk	Cdkl5	Car10
Impact	Epm2aip1	Klhl22	Cers4	Cdkn1a	Car11
Impdh2	Eprs	Klhl30	Cers5	Cdkn2a	Car12
Ina	Eps15	Klhl31	Cers6	Cdkn2aip	Car14
Ino80b	Eps8	Klhl6	Ces1d	Cdkn2c	Car2
Inpp4b	Eps8l1	Klhl8	Ces5a	Cdkn2d	Car3
Inpp5d	Erap1	Klra17///RGD1561306///LOC497796	Cetn2	Cdkn3	Car4
Inpp5j	Erbin	Kmt2a	Cetn4	Cdo1	Car6
Inppl1	Ercc8	Kmt5a	Cfap100	Cdon	Car7
Insig1	Erf	Knstrn	Cfap126	Cdr2	Car8
Insig2	Erh	Kpna1	Cfap161	Cds1	Car9
Insrr	Erich2	Kpna2	Cfap36	Cdt1	Card10
Ints6l	Erlec1	Kpnb1	Cfap45	Cdv3	Card11
Invs	Ermn	Krcc1	Cfap69	Cdx2	Card14
Ipmk	Ero1b	Krtdap	Cfb///C2	Cdyl	Card19
Ipo5	Erp44	Ktn1	Cfd	Cdyl2	Card9
Iqcb1	Errfi1	Ky	Cfdp1	Ceacam1	Carf
Iqgap1	Esam	L3mbtl2	Cfh	Ceacam4///Ceacam1	Carhsp1
Iqsec1	Esm1	Lacc1	Cfi	Cebpa	Carm1
Iqsec2	Espl1	Lactb	Cfl2	Cebpb	Carmil1
Iqub	Esr2	Lad1	Cflar	Cebpd	Carmil2
Irak1bp1	Esyt1	Lama2	Cfp	Cebpe	Carmil3
Irak2	Etf1	Lamc1	Cggbp1	Cebpg	Cars
Irf2bp2	Etfb	Lamp5	Cgn	Cebpz	Cars2
Irf2bpl	Ethe1	Lamtor3	Ch25h	Cecr6	Cartpt
Irs3	Etnk1	Lamtor4	Chac1	Cela1	Casc1
Isca1	Etnk2	Lancl1	Chadl	Celf1	Casc3
Isg20	Ets1	Laptm4a	Chaf1a	Celf2	Casc4
Isl1	Etv5	Laptm5	Chaf1b	Celf3	Casd1
Islr	Eva1a	Large1	Chat	Celf4	Cask
Isoc1	Eva1b	Larp1b	Chchd10	Celf5	Caskin1
Isy1	Evc	Lasp1	Chchd6	Celsr2	Caskin2
Itfg1	Evi2b	Lbh	Chchd7	Celsr3	Casp1
Itga3	Evi5	Lbhd1	Chd1	Cemip	Casp12
Itga4	Exoc1	Lcp1	Chd1l	Cenpa	Casp16
Itgae	Exoc2	Lcp2	Chd4	Cenpe	Casp2
Itgb1	Exoc3l2	Ldb1	Chd6	Cenpf	Casp3
Itih3	Exosc4	Ldb3	Chd9	Cenpi	Casp4
Itpr1	Exosc7	Lef1	Chdh	Cenpj	Casp6
Itsn2	Exosc9	Lemd1	Chek1	Cenpk	Casp7
Jag2	Ext1	Lemd2	Chek2	Cenpl	Casp8
Jak2	Ext2	Lemd3	Chfr	Cenpm	Casp9
Jakmip1	Extl2	Leprot	Chga	Cenpn	Casq2
Jam2	Eya2	Leprotl1	Chgb	Cenpt	Casr
Jarid2	Eya3	Lgals2	Chic1	Cenpu	Cast
Jazf1	Ezh2	Lgals8	Chic2	Cenpv	Casz1
Jmjd1c	Ezr	Lgi1	Chka	Cenpw	Catsper2
Jsrp1	F13a1	Lgi3	Chkb	Cep104	Cav1
Jun	F2	Lhfpl2	Chl1	Cep126	Cav2
Junb	F3	Lhfpl3	Chmp1a	Cep128	Cav3
Kars	F9	Lhfpl5	Chmp1b	Cep135	Cbarp
Kat14	Faap24	Lhpp	Chmp1b///RGD1566265	Cep152	Cbfa2t2
Kat2b	Fabp1	Lilrb4	Chmp2a	Cep170b	Cbfa2t3
Kazn	Fabp4	Lima1	Chmp2b	Cep19	Cbfb
Kcna1	Fabp5	Limd2	Chmp4c	Cep295	Cbl
Kcna6	Fabp6	Lin54	Chmp6	Cep295nl	Cblb
Kcnab1	Fads3	Lin7c	Chmp7	Cep41	Cblc
Kcnab2	Fah	Linc01158	Chn1	Cep57l1	Cbln1
Kcnab3	Fahd1	Lingo1	Chn2	Cep70	Cbln2
Kcnc1	Fahd2a	Lingo2	Chodl	Cep72	Cbr3
Kcnc2	Faim2	Lingo4///Rorc	Chpf2	Cep97	Cbs
Kcnd2	Fam104a	Lins1	Chpt1	Cercam	Cbwd1
Kcne1	Fam105a	Lipe	Chrac1	Cerk	Cbx1
Kcnf1	Fam107a	Lipt2	Chrm1	Cers5	Cbx5
Kcnh4	Fam110a	Llph	Chrm3	Cers6	Cbx6
Kcnh7	Fam110b	Lmbrd1	Chrna2	Ces5a	Cbx7
Kcnip1	Fam111a	Lmf1	Chrna4	Cetn2	Cby1
Kcnj11	Fam114a1	Lmna	Chrna5	Cfap100	Cc2d1a
Kcnj12	Fam120a	Lmnb1	Chrnb1	Cfap161	Cc2d1b
Kcnj14	Fam120b	Lnpep	Chrnb2	Cfap36	Cc2d2a
Kcnj15	FAM120C	Lnx1	Chst1	Cfap45	Ccar1
Kcnj2	Fam126b	LOC100125362	Chst10	Cfap69	Ccbe1
Kcnj3	Fam129b	LOC100125364	Chst12	Cfb///C2	Ccdc102a
Kcnj6	Fam134a	LOC100134871///Hbb-b1///Hbb	Chst14	Cfd	Ccdc105
Kcnk1	Fam134b	LOC100151767	Chst2	Cfh	Ccdc106
Kcnk6	Fam134b///Zfp622	LOC100302372	Chst4	Cfhr1	Ccdc107
Kcnn2	Fam135a	LOC100359454	Chst5	Cfi	Ccdc112
Kcnn3	Fam151b	LOC100359521	Chst8	Cfl2	Ccdc113
Kcnn4	Fam155a	LOC100359574///Nhp2l1	Chsy1	Cflar	Ccdc115
Kcnv1	Fam159b	LOC100359613///LOC688511///Rpl12///RGD1563956///Rpl12-ps1	Chtf18	Cfp	Ccdc117
Kctd10	Fam160b1	LOC100359960///LOC688473///LOC687872///RGD1562399///Rps2	Chtf8	Cggbp1	Ccdc120
Kctd13	Fam162a	LOC100359980	Ciao1	Cgn	Ccdc124
Kctd17	Fam168a	LOC100360205	Cib1	Cgrrf1	Ccdc125
Kctd18	Fam171b	LOC100360244	Cib2	Ch25h	Ccdc126
Kctd3	Fam173b	LOC100360384	Ciita	Chac1	Ccdc127
Kctd4	Fam175a	LOC100360511	Cinp	Chac2	Ccdc130
Kdelr2	Fam179b	LOC100360737///Hand1	Cipc	Chad	Ccdc134
Kdelr3	Fam183b	LOC100360845	Cirbp	Chaf1a	Ccdc136
Kdm5a	Fam188a	LOC100360908///Pde4c	Cisd1	Chaf1b	Ccdc141
Kdm8	Fam192a	LOC100361180///Rps17l///RGD1559955///Rps17	Cisd2	Champ1	Ccdc149
Khnyn	Fam198b	LOC100361467	Cish	Chat	Ccdc153
Kidins220	Fam204a	LOC100361913	Cit	Chchd10	Ccdc163
Kif11	Fam207a	LOC100361917	Cited2	Chchd2	Ccdc167
Kif12	Fam20b	LOC100362824///Cav2	Cited4	Chchd6	Ccdc17
Kif1bp	Fam20c	LOC100363428///Ns5atp9	Ciz1	Chchd7	Ccdc174
Kif22	Fam210a	LOC100363441	Ckap4	Chd1	Ccdc177
Kif27	Fam210b	LOC100363536	Ckap5	Chd1l	Ccdc180
Kif5a	Fam213a	LOC100364126///Snx21	Ckb	Chd2	Ccdc181
Kif5c	Fam216a	LOC100364949///Fbln1	Cklf	Chd6	Ccdc184
Kif6	Fam234b	LOC100365207	Ckm	Chd7	Ccdc186
Kifc2	Fam45a	LOC100365768///LOC691600///LOC690700///LOC689679///LOC685769///LOC685668///LOC681180///LOC680443///LOC680326///LOC501396///LOC501256///LOC501224///LOC501223///LOC501091///MGC116197///LOC367381///RGD1565423///LOC363306///LOC363181///LOC301748///LOC301193	Ckmt1b	Chd8	Ccdc187
Kirrel3	Fam46a	LOC100366119	Cks1b	Chd9	Ccdc22
Kit	Fam49b	LOC100366216	Cks2	Chdh	Ccdc24
Klc1	Fam57b	LOC100366259	Clasp1	Chek1	Ccdc25
Klc2	Fam60a	LOC100910558	Clasp2	Chek2	Ccdc28a
Klf10	Fam63a	LOC100910754///Sept7	Clasrp	Chfr	Ccdc28b
Klf4	Fam63b	LOC100910973	Clca1	Chga	Ccdc3
Klf5	Fam65a	LOC100911627	Clca4l	Chgb	Ccdc30
Klf6	Fam69a	LOC100911717	Clca4l///Clca2	Chi3l1	Ccdc32
Klhdc3	Fam69b	LOC100912573///Ms4a6bl	Clcc1	Chic1	Ccdc34
Klhdc8a	Fam84a	LOC102549726	Clcf1	Chic2	Ccdc43
Klhl11	Fam84b	LOC102550394	Clcn3	Chka	Ccdc47
Klhl13	Fam96a	LOC102553190	Clcn4	Chmp1a	Ccdc51
Klhl23	Fanca	LOC102554622///Sh3bgrl2	Clcn6	Chmp1b	Ccdc53
Klhl24	Fancc	LOC103690154	Cldn1	Chmp1b///RGD1566265	Ccdc58
Klhl36	Fancd2	LOC108348125	Cldn10	Chmp2b	Ccdc6
Klhl8	Fance	LOC288913	Cldn11	Chmp3	Ccdc61
Klk1c3	Farp1	LOC294154	Cldn12	Chmp4c	Ccdc65
Klrb1c	Farsb	LOC306766	Cldn4	Chmp5	Ccdc68
Klrd1	Fas	LOC308990	Cldnd1	Chmp6	Ccdc69
Kmt2a	Fasn	LOC312273	Clec10a	Chmp7	Ccdc71l
Kmt5a	Fastkd3	LOC314509///Igh-6	Clec11a	Chn1	Ccdc77
Kng1	Fat2	LOC360919	Clec12a	Chn2	Ccdc78
Kng1l1///Kng2///Kng1	Fau	LOC361016	Clec16a	Chodl	Ccdc8
Kpna1	Fbl	LOC361635	Clec1b	Chpf2	Ccdc80
Kpnb1	Fblim1	LOC362695	Clec2d	Chpt1	Ccdc81
Kras	Fbln2	LOC365985	Clec2l	Chrac1	Ccdc85b
Krcc1	Fbln5	LOC366772///Igha	Clec3b	Chrd	Ccdc85c
Krt10	Fbn1	LOC497952	Clec4a	Chrdl2	Ccdc86
Krt7	Fbp1	LOC498154	Clec4a1	Chrm1	Ccdc88a
Krt8	Fbxl20	LOC499331	Clec4a3	Chrm2	Ccdc88c
Krtap1-1	Fbxl3	LOC499770	Clec7a	Chrm3	Ccdc9
Lace1	Fbxl5	LOC500956	Clic1	Chrna10	Ccdc90b
Lad1	Fbxl6	LOC619574	Clic2	Chrna4	Ccdc91
Lamc1	Fbxo10	LOC64038	Clic3	Chrna5	Ccdc92
Lamp5	Fbxo11	LOC680254	Clic4	Chst1	Ccdc93
Laptm5	Fbxo16	LOC680590	Clint1	Chst10	Ccdc96
Large1	Fbxo2	LOC680700///RGD1559639///RGD1566137///Rpl10a	Clip1	Chst11	Ccdc97
Lasp1	Fbxo21	LOC682812	Clip2	Chst12	Cchcr1
Lbh	Fbxo22	LOC683605///Sdccag3	Clk2	Chst14	Cck
Lbhd1	Fbxo25	LOC683751	Clk4	Chst2	Cckar
Lbp	Fbxo3	LOC683897	Clmp	Chst4	Cckbr
Lcat	Fbxo33	LOC685152	Cln5	Chst5	Ccl11
Lcn2	Fbxo40	LOC685203	Cln8	Chst8	Ccl19
Lcp1	Fbxo44	LOC686774	Clock	Chsy1	Ccl2
Ldb3	Fbxo9	LOC687048///Fam65b///Ftl1	Clp1	Chtf8	Ccl20
Ldhb	Fbxw17	LOC687609	Clpb	Chtop///LOC361990	Ccl21
Ldhc	Fbxw4	LOC688452	Clptm1l	Ciao1	Ccl22
Lenep	Fbxw5	LOC688473///RGD1562399///Rps2	Clstn1	Cib1	Ccl24
Leprotl1	Fcer1g	LOC688637	Clstn2	Cib2	Ccl27
Lgals1	Fcer2	LOC688765	Clstn3	Cideb	Ccl28
Lgals3	Fcgr1a	LOC688832	Cltb	Ciita	Ccl3
Lgals3bp	Fcgr2b	LOC691143	Cluap1	Cilp2	Ccl4
Lgals7	Fcgr3a	LOC691918	Cluh	Cipc	Ccl5
Lgi3	Fcgrt	LOC691931	Clybl	Cirbp	Ccl6
Lhfpl2	Fcho1	LOC691988	Cma1	Cisd1	Ccl7
Lhfpl5	Fcho2	LOC691995	Cmah	Cit	Ccl9
Lhpp	Fchsd2	Loxl2	Cmas	Cited2	Ccna1
Lhx1	Fcna	Lpar1	Cmbl	Ckap4	Ccna2
Lilrb4	Fdft1	Lpar4	Cmip	Ckap5	Ccnb1
Limd2	Fdps	Lpgat1	Cmklr1	Ckb	Ccnb1ip1
Lin54	Fdx1l	Lrch4	Cmpk2	Cklf	Ccnb2
Lin7c	Fdxr	Lrfn4	Cmtm2a	Ckmt1b	Ccnc
Linc01158	Fem1a	Lrfn5	Cmtm3	Cks1b	Ccnd1
Lingo1	Fem1b	Lrg1	Cmtm5	Cks2	Ccnd2
Lingo2	Fer	Lrig3	Cmtm6	Clasp1	Ccnd3
Lipe	Fermt3	Lrp1	Cmtm7	Clasp2	Ccndbp1
Lman1	Fez1	Lrp10	Cmtm8	Clasrp	Ccne1
Lmbrd1	Fez2	Lrp11	Cnbd2	Clca1	Ccne2
Lmcd1	Ffar2	Lrp4	Cndp1	Clcc1	Ccnf
Lmna	Fga	Lrp6	Cndp2	Clcf1	Ccng1
Lmnb1	Fgf1	Lrpprc	Cnih1	Clcn3	Ccng2
LOC100125362	Fgf12	Lrr1	Cnih2	Clcn4	Ccni
LOC100134871///Hbb-b1///Hbb	Fgf13	Lrrc19	Cnih4	Clcn6	Ccnjl
LOC100174910	Fgf18	Lrrc28	Cnksr2	Clcn7	Ccnl1
LOC100302372	Fgf9	Lrrc40	Cnksr3	Clcnka	Ccnl2
LOC100359515///LOC497963///Nos2	Fgfr1	Lrrc41	Cnn1	Cldn1	Ccnt2
LOC100359574///Nhp2l1	Fgfr2	Lrrc42	Cnn2	Cldn10	Ccny
LOC100359613///LOC688511///Rpl12///RGD1563956///Rpl12-ps1	Fgfr3	Lrrc43	Cnn3	Cldn11	Ccp110
LOC100359937///LOC501441///Gabarapl2	Fgl2	Lrrc4b	Cnnm2	Cldn12	Ccpg1
LOC100359960///LOC688473///LOC687872///RGD1562399///Rps2	Fh	Lrrc4c	Cnnm3	Cldn18	Ccpg1os
LOC100359969///Rpsa	Fhdc1	Lrrc57	Cnot1	Cldn22	Ccr1
LOC100359980	Fhl2	Lrrfip1	Cnot11	Cldn4	Ccr2
LOC100360507///Cbr1	Fhl3	Lrrn2	Cnot4	Cldn5	Ccr3
LOC100360845	Fhod1	Lsm10	Cnot6	Cldn6	Ccr5
LOC100360908///Pde4c	Fibin	Lsm11	Cnot6l	Cldn7	Ccr6
LOC100361025///Prmt1	Fis1	Lsm12	Cnot9	Cldnd1	Ccr7
LOC100361060///LOC100359616///Rpl36	Fkbp11	Lsm2	Cnp	Clec10a	Ccrl2
LOC100361067///Psma3l///Psma3	Fkbp14	Lsp1	Cnppd1	Clec11a	Ccsap
LOC100361467	Fkbp15	Lss	Cnpy2	Clec12a	Ccser2
LOC100361547///Cyp2c7	Fkbp1a	Ltb	Cnpy4	Clec14a	Cct2
LOC100361913	Fkbp2	Ltbp3	Cnr1	Clec16a	Cct3
LOC100362069///LOC690096///RGD1565183///Rpl28	Fkbp5	Ltbr	Cnr2	Clec1a	Cct4
LOC100362333///Pole3	Flcn	Ltv1	Cnrip1	Clec1b	Cct5
LOC100362409///Obp1f	Fli1	Luc7l3	Cnst	Clec2d	Cct6a
LOC100362572	Flna	Luzp1	Cntfr	Clec2l	Cct7
LOC100362824///Cav2	Flnc	Luzp2	Cntn1	Clec3b	Cct8
LOC100362830///Rps7	Flot1	Ly6e	Cntn2	Clec4a	Ccz1b
LOC100362895///Hsp90aa1	Flot2	Ly96	Cntn3	Clec4a1	Cd14
LOC100363271///LOC100125366///LOC679871///RGD1562399///Rps2	Flywch1	Lyl1	Cntn4	Clec4a3	Cd163
LOC100363428///Ns5atp9	Fmc1	Lypd2	Cntn6	Clec4f	Cd164
LOC100363537///LOC680700///RGD1560124///Rpl10a	Fmnl1	Lypd8	Cntnap1	Clec7a	Cd164l2
LOC100363561///Ece2	Fmnl3	Lyrm2	Cntnap2	Clec9a	Cd180
LOC100364537///Ddit4l2	Fmo5	Lysmd2	Cntrl	Clic1	Cd1d1
LOC100364956///LOC100364500///RT1-A///LOC683761///RT1-CE10///RT1-CE2///RT1-A3///RT1-Cl///RT1-A2///RT1-A1///RT1-EC2	Fn1	Lztr1	Coa4	Clic2	Cd2
LOC100365047///RGD1565355///Cd36	Fn3k	M6pr	Coa5	Clic4	Cd200
LOC100365207	Fnbp1	Madd	Cobl	Clint1	Cd200r1
LOC100365566	Fndc3b	Mafg	Cobll1	Clip1	Cd200r1l
LOC100365768///LOC691600///LOC690700///LOC689679///LOC685769///LOC685668///LOC681180///LOC680443///LOC680326///LOC501396///LOC501256///LOC501224///LOC501223///LOC501091///MGC116197///LOC367381///RGD1565423///LOC363306///LOC363181///LOC301748///LOC301193	Fndc5	Maged1	Coch	Clip2	Cd209b
LOC100366259	Fnip1	Magi1	Cog2	Clk1	Cd209f
LOC100909441///Tuba1b///Tuba1c	Fnip2	Mal2	Cog3	Clk2	Cd22
LOC100909581///LOC690940///LOC685520///LOC680968///Hmg1l1///RGD1563668///Hmgb1	Folr1	Man1a1	Cog4	Clk4	Cd24
LOC100909586///Camk2g	Folr2	Man2a1	Cog5	Clmp	Cd244
LOC100909593///RT1-DMa	Fos	Man2b1	Col11a1	Cln5	Cd247
LOC100909630///RT1-DMb	Fosl1	Man2b2	Col11a2	Clock	Cd248
LOC100909655///RragB	Fosl2	Manba	Col12a1	Clp1	Cd276
LOC100909929///Ttpa	Foxa2	Manf	Col13a1	Clpb	Cd28
LOC100910284///Bcan	Foxa3	Map1b	Col14a1	Clpp	Cd2ap
LOC100910370///LOC100360117///RGD1561333///Rpl8	Foxc2	Map2k3	Col16a1	Clptm1	Cd2bp2
LOC100910418///Plat	Foxd4	Map2k7	Col17a1	Clptm1l	Cd300a
LOC100910558	Foxe3	Map3k1	Col18a1	Clstn1	Cd302
LOC100910732///Pak2	Foxi2	Map3k3	Col19a1	Clstn3	Cd33
LOC100910739///LOC100362856///Olr1701///Olr1700///Olr1699///Olr1697	Foxk2	Map4	Col1a1	Cltb	Cd34
LOC100910754///Sept7	Foxo4	Map4k2	Col1a2	Cluap1	Cd36
LOC100910869///Arl3	Foxo6	Map7d2	Col24a1	Cluh	Cd37
LOC100911177	Foxq1	Mapk1ip1	Col25a1	Clybl	Cd38
LOC100911186///Echs1	Foxs1	Mapk1ip1l	Col2a1	Cmah	Cd3d
LOC100911261///Flnb	Fpgs	Mapk4	Col3a1	Cmas	Cd3e
LOC100911343///Pcyt1a	Fra10ac1	Mapk8	Col4a1	Cmbl	Cd3e-ps1
LOC100911540///Rack1	Frmd4a	Mapkap1	Col4a2	Cmc2	Cd3eap
LOC100911564///Gnmt	Frmd5	Mapre1	Col4a5	Cmip	Cd3g
LOC100911572///Col4a3	Frmd8	Mapre2	Col4a6	Cmklr1	Cd4
LOC100911574	Frrs1l	Mapre2///Mapre3	Col5a1	Cmpk1	Cd40
LOC100911579///C4b///C4a	Frs2	Mapre3	Col5a2	Cmpk2	Cd40lg
LOC100911627	Frzb	March2	Col5a3	Cmtm3	Cd44
LOC100911825///LOC498276///Fcgr2a	Fst	March3	Col6a1	Cmtm5	Cd46
LOC100911833///LOC100911784///Mug1	Fstl1	Marcks	Col6a2	Cmtm6	Cd47
LOC100911856///RGD1559962///RGD1561694///Hmgb2l1///Hmgb2	Fth1	Mark4	Col6a3	Cmtm7	Cd48
LOC100911874///Slc40a1	Fthl17	Masp1	Col6a6	Cmtm8	Cd52
LOC100911902///Crabp2	Fto	Masp2	Col7a1	Cmya5	Cd53
LOC100911905///Apoc1	Ftx	MAST1	Col8a1	Cnbd2	Cd55
LOC100911950	Fubp1	Mast3	Col8a2	Cndp1	Cd59
LOC100911986///Gli4	Fundc2	Mat1a	Col9a1	Cndp2	Cd5l
LOC100912024///LOC100362298///LOC100360679///Rps18	Fuom	Matn2	Col9a3	Cnga3	Cd6
LOC100912040///Ugt1a3///Ugt1a2///Ugt1a8///Ugt1a7c///Ugt1a6///Ugt1a1	Furin	Matr3	Colca2	Cngb1	Cd63
LOC100912151	Fut4	Max	Colec11	Cnih2	Cd68
LOC100912399///Map3k1	Fxyd2	Mb	Colec12	Cnih4	Cd69
LOC100912469///Scd2	Fxyd5	Mb21d2	Colgalt1	Cnksr2	Cd7
LOC100912479///Vcam1	Fxyd7	Mbnl1	Colgalt2	Cnn1	Cd74
LOC100912484///Bbx	Fyttd1	Mbnl2	Commd10	Cnn2	Cd79b
LOC100912578///Hspa9	Fzd1	Mboat1	Commd2	Cnn3	Cd80
LOC100912585///Mapk7	Fzr1	Mbtps1	Comp	Cnnm2	Cd82
LOC100912619///LOC100909419///LOC100364260///LOC100363434///LOC100361876///LOC100361445///LOC100361385///Rps29	G3bp1	Mcam	Comt	Cnnm3	Cd83
LOC100912649	Gaa	Mcat	Comtd1	Cnot1	Cd86
LOC100912724///LOC691603///Mcpt8l2///Mcpt8l3///Mcpt9///Mcpt10///Mcpt8	Gab1	Mcfd2	Copa	Cnot6	Cd8a
LOC100912819///LOC100912746///LOC100911966///LOC100910109///LOC100361311///LOC684838///LOC680161///RGD1562409///RGD1562953///RGD1563220///RGD1560194///LOC305779///Rsl1d1///Rpl7a	Gabarap	Mcm3	Copb1	Cnot6l	Cd8b
LOC102546572	Gabarapl1	Mcm4	Copb2	Cnot9	Cd9
LOC102547664	Gabbr1	Mdfic	Cope	Cnp	Cd93
LOC102547700	Gabbr2	Mdh1	Copg1	Cnppd1	Cd96
LOC102547703	Gabra4	Mdk	Copg2	Cnpy2	Cd99
LOC102548539	Gabra5	Mdn1	Coprs	Cnpy4	Cd99l2
LOC102548827///Prp2l1	Gabrb1	Mea1	Cops2	Cnr1	Cdadc1
LOC102548944	Gabrb2	Med10	Cops3	Cnr2	Cdc123
LOC102549760	Gabrb3	Med11	Cops6	Cnrip1	Cdc14a
LOC102550329	Gad1	Med13l	Cops8	Cnst	Cdc14b
LOC102550403	Gadd45a	Med15	Copz1	Cntf	Cdc16
LOC102551959	Gadd45gip1	Med19	Copz2	Cntln	Cdc20
LOC102552654	Galk1	Med29	Coq10a	Cntn1	Cdc23
LOC102553386///Tmem215///Ube2i	Galnt1	Mef2a	Coq10b	Cntn2	Cdc25a
LOC102555086	Galnt13	Mef2c	Coq2	Cntn3	Cdc25b
LOC102555453///Rpl12///RGD1564883	Galnt16	Megf11	Coq3	Cntn4	Cdc26
LOC102555743///Rpl41	Galnt5	Memo1	Coq5	Cntn6	Cdc27
LOC102556259	Gamt	Men1	Coq7	Cntnap1	Cdc34
LOC102556485	Gapdh	Metap1d	Coq8a	Cntnap2	Cdc37
LOC103690173///Zfp280b	Garnl3	Mettl16	Coq9	Cntrl	Cdc37l1
LOC257642	Gars	Mettl23	Coro1a	Coa3	Cdc40
LOC286992	Gas2	Mettl26	Coro1c	Coa5	Cdc42
LOC290071	Gas2l3	Mettl9	Coro2a	Coa7	Cdc42bpb
LOC291863	Gas5	Mex3c	Coro2b	Cobl	Cdc42ep1
LOC294154	Gas6	Mfap2	Coro6	Cobll1	Cdc42ep2
LOC300303///Npm1	Gas7	Mfap4	Cotl1	Coch	Cdc42ep3
LOC308990	Gast	Mfap5	Cox11	Cog2	Cdc42ep5
LOC314509///Igh-6	Gata3	Mfn1	Cox15	Cog3	Cdc42se1
LOC361016	Gatad2a	Mfrp	Cox16	Cog5	Cdc42se2
LOC362695	Gba2	Mfsd11	Cox19	Coil	Cdc45
LOC365985	Gbas	Mfsd2a	Cox4i1	Col10a1	Cdc5l
LOC366772///Igha	Gbp2	Mfsd5	Cox4i2	Col11a1	Cdca2
LOC499331	Gcc2	Mfsd9	Cox5a	Col11a2	Cdca3
LOC499770	Gcdh	MGC105649	Cox5b	Col12a1	Cdca4
LOC500654///Eif4a1	Gch1	MGC108823	Cox6a1	Col13a1	Cdca7
LOC500956	Gclc	MGC109340	Cox6b2	Col14a1	Cdca7l
LOC619574	Gclm	MGC95208	Cox7a2l2///Cox7a2	Col16a1	Cdca8
LOC679931	Gcn1l1	Mgll	Cox7b	Col17a1	Cdcp1
LOC680254	Gcnt1	Mib2	Cox8a	Col18a1	Cdh1
LOC680700///RGD1559639///RGD1566137///Rpl10a	Gcnt2	Mical1	Cp	Col19a1	Cdh10
LOC681314///Bax	Gcnt3	Micu3	Cpa2	Col1a1	Cdh11
LOC682812	Gcs1	Mid1	Cpd	Col1a2	Cdh12
LOC683062///Vdac1	Gda	Mier3	Cpe	Col20a1	Cdh13
LOC683751	Gdap1l1	Mif4gd	Cpeb1	Col25a1	Cdh15
LOC684327	Gde1	Miga2	Cpeb3	Col26a1	Cdh16
LOC684871	Gdf1///Cers1	Mir29c	Cpeb4	Col27a1	Cdh17
LOC685020///Pilra	Gdf11	Misp3	Cped1	Col3a1	Cdh2
LOC685152	Gdf15	Mki67	Cpg1	Col4a1	Cdh20
LOC685158	Gemin6	Mkks	Cplx1	Col4a2	Cdh22
LOC685186///RGD1565368///RGD1562758///RGD1564688///RGD1565238///RGD1564958///Gapdh	Get4	Mkln1	Cpm	Col4a5	Cdh23
LOC685203	Gfap	Mknk1	Cpne3	Col4a6	Cdh3
LOC688452	Gfi1	Mknk2	Cpne4	Col5a1	Cdh4
LOC688473///RGD1562399///Rps2	Gfpt1	Mkrn1	Cpne5	Col5a2	Cdh5
LOC688637	Gga2	Mlana	Cpne6	Col5a3	Cdh6
LOC688682///Snurf///Snrpn	Ggct	Mlec	Cpne8	Col6a1	Cdh7
LOC689064	Ggcx	Mllt11	Cpne9	Col6a2	Cdh8
LOC689130///LOC679217///Fth1	Ggt7	Mlx	Cpox	Col6a3	Cdhr1
LOC691392///LOC499522///RGD1560017///Rpl17l1///Rpl17	Ggta1	Mlxip	Cpped1	Col6a5	Cdhr2
LOC691603///Mcpt9	Ghitm	Mmaa	Cpq	Col6a6	Cdhr4
LOC691809	Ghr	Mmp14	Cps1	Col7a1	Cdhr5
LOC691918	Ghsr	Mmrn1	Cpsf2	Col8a1	Cdip1
LOC691931	Gid4	Mnat1	Cpsf3	Col8a2	Cdk1
LOC691988	Gif	Mns1	Cpsf3l	Col9a3	Cdk10
LOC691995	Gigyf2	Mob1a	Cpsf4	Colca2	Cdk11b
Lonp2	Gimap5	Mob3a	Cpsf6	Colec12	Cdk12
Lox	Ginm1	Mob4	Cpt1a	Colgalt1	Cdk13
Loxl1	Gins1	Mobp	Cpt1c	Colgalt2	Cdk14
Loxl2	Gins4	Morc1	Cpt2	Commd2	Cdk16
Lpar4	Gipc1	Morf4l1	Cptp	Commd8	Cdk17
Lrba	Git1	Mospd1	Cpxm1	Comp	Cdk18
Lrfn4	Git2	Mospd3	Cpxm2	Comt	Cdk19
Lrfn5	Gja1	Mpc1	Cpz	Comtd1	Cdk2
Lrg1	Gja4	Mpeg1	Cr1l	Copa	Cdk20
Lrig3	Gjb2	Mphosph8	Cr2	Copb1	Cdk2ap1
Lrp10	Gjb5	Mppe1	Crabp1	Copb2	Cdk2ap2
Lrp12	Gjc1	Mpped1	Crat	Copg1	Cdk4
Lrp2	Gkap1	Mpv17l	Crb3	Copg2	Cdk5
Lrp3	Glb1	Mpv17l2	Crbn	Coprs	Cdk5r1
Lrp5	Glcci1	Mpz	Crcp	Cops3	Cdk5rap1
Lrpap1	Gli4	Mras	Creb3	Cops4	Cdk5rap2
Lrrc19	Glipr1	Mrc1	Creb3l1	Cops5	Cdk5rap3
Lrrc28	Glmn	Mrgprf	Creb3l2	Cops6	Cdk7
Lrrc41	Glmp	Mri1	Creb5	Cops7a	Cdk9
Lrrc42	Glra2	Mrpl13	Crebbp	Cops8	Cdkal1
Lrrc4c	Glra3	Mrpl14	Crebl2	Copz1	Cdkl2
Lrrc59	Glrx	Mrpl19	Crebrf	Copz2	Cdkl4
Lrrfip1	Gls2	Mrpl2	Crebzf	Coq10a	Cdkl5
Lrrfip2	Gltscr1l	mrpl24	Creg1	Coq10b	Cdkn1a
Lrrn2	Glud1	Mrpl27	Creg2	Coq2	Cdkn1b
Lsm11	Glul	Mrpl35	Creld2	Coq3	Cdkn1c
Lsm12	Glyat	Mrpl36	Crem	Coq5	Cdkn2a
Lsm2	Gm2a	Mrpl41	Crhbp	Coq6	Cdkn2aip
Lsp1	Gmfb	Mrpl42	Crhr1	Coq7	Cdkn2aipnl
Ltb	Gmfg	Mrpl46	Crip1	Coq8a	Cdkn2c
Ltbr	Gmnn	Mrpl47	Crip2	Coq9	Cdkn2d
Luc7l3	Gmppa	Mrpl48	Cript	Coro1a	Cdkn3
Luzp2	Gmpr2	Mrpl49	Crispld2	Coro1c	Cdo1
Ly6l	Gmps	Mrps14	Crk	Coro2a	Cdon
Lyl1	Gna15	Mrps16	Crlf1	Coro2b	Cdr2
Lyn	Gnai1///Gnai3	Mrps17	Crlf2	Coro6	Cds1
Lyrm2	Gnai2	Mrps18a	Crlf3	Cotl1	Cdt1
Lyve1	Gnal	Mrps22	Crmp1	Cox10	Cdv3
Lyz2	Gnao1	Mrps27	Crtac1	Cox11	Cdx2
Madd	Gnaq	Mrps31	Crtc1	Cox14	Cdyl
Maf	Gnas	Mrps5	Cry2	Cox15	Cdyl2
Mafb	Gnat1	Ms4a1	Cryab	Cox16	Ceacam1
Mal	Gnaz	Ms4a6a	Crybb1	Cox17	Ceacam11
Mal2	Gnb1	Ms4a6bl	Cryga	Cox18	Ceacam3
Mamdc2	Gnb2	Msgn1	Crym	Cox19	Ceacam4
Man1a1	Gnb5	Msh5	Cryzl1	Cox4i1	Cebpa
Man2a1	Gne	Msl3	Cs	Cox5a	Cebpb
Man2a2	Gng12	Msln	Csad	Cox5b	Cebpd
Man2c1	Gng2	Msn	Csdc2	Cox6a1	Cebpe
Manea	Gng3	Msrb1	Cse1l	Cox6a2	Cebpg
Manf	Gng8	Msrb2	Csf1	Cox6b2	Cebpz
Maob	Gngt1	Mss51	Csf1r	Cox7a2l2///Cox7a2	Cecr6
Map1a	Gnl3	Msto1	Csf2ra	Cox7b	Cel
Map2	Gnl3l	Mt4	Csf3	Cox7c	Cela1
Map2k1	Gnmt	Mtch1	Csf3r	Cox8a	Cela3b
Map2k3	Gnpat	Mtcl1	Csgalnact1	Cp	Celf1
Map2k6	Gnpda1	Mtfr1l	Csgalnact2	Cpa2	Celf2
Map3k1	Gnpda2	Mtg1	Csk	Cpa4	Celf3
Map3k3	Gnptg	Mtm1	Csn3	Cpa6	Celf4
Map3k6	Gnrhr	Mtmr1	Csnk1a1	Cpb1	Celf5
Map4	Gns	Mtmr11	Csnk1d	Cpd	Celsr1
Map4k2	Golga4	Mtmr4	Csnk1e	Cpe	Celsr2
Map7d2	Golgb1	Mto1	Csnk1g3	Cpeb1	Celsr3
Mapk14	Golt1a	Mtrf1	Csnk2a1	Cpeb3	Cemip
Mapk1ip1	Golt1b	Mum1l1	Csnk2a2	Cpeb4	Cend1
Mapk1ip1l	Got1	Mus81	Cspg5	Cped1	Cenpa
Mapk4	Gpam	Mx2	Cspp1	Cplx1	Cenpb
Mapk8	Gpatch4	Mxd4	Csrnp1	Cpm	Cenpe
Mapk8ip2	Gpbp1	Mxi1	Csrnp2	Cpn1	Cenpf
Mapkapk2	Gpc3	Mybpc1	Csrnp3	Cpne3	Cenpi
Mapkapk3	Gpc5	Myd88	Csrp1	Cpne4	Cenpj
Mapre1	Gpc6	Mydgf	Csrp2	Cpne5	Cenpk
Mapre2///Mapre3	Gpd1	Myef2	Csrp3	Cpne6	Cenpl
Mapt	Gpd2	Myg1	Cst3	Cpne8	Cenpm
Marc2	Gpld1	Myh1	Cst6	Cpne9	Cenpn
March2	Gpm6b	Myh10	Cst7	Cpox	Cenpq
March3	Gpnmb	Myh2///Myh4	Cstb	Cpped1	Cenpt
March6	Gpr107	Myh6	Cstf1	Cpq	Cenpu
Marcks	Gpr108	Myh7	Cstf2	Cps1	Cenpv
MAST1	Gpr137b	Myh9	Cstf3	Cpsf2	Cenpw
Mat1a	Gpr150	Myl6b///Myl6///Myl6l	Ctbp2	Cpsf4	Cep104
Mat2b	Gpr155	Mylip	Ctbs	Cpsf6	Cep126
Matn2	Gpr158	Mylk2	Ctc1	Cpt1a	Cep128
Matr3	Gpr161	Myo1b	Ctdnep1	Cpt1b	Cep135
Max	Gpr176	Myo1g	Ctdp1	Cpt1c	Cep152
Mb21d2	Gpr182	Myof	Ctdsp1	Cptp	Cep162
Mbl1	Gpr6	Myt1	Ctdsp2	Cpxm1	Cep164
Mbnl2	Gpr68	Mzb1	Ctdspl	Cpxm2	Cep170b
Mbnl3	Gprc5b	N4bp1	Ctdspl2	Cpz	Cep19
Mbp	Gprc5c	Naa35	Ctgf	Cr1l	Cep250
Mc5r	Gprin1	Naaa	Cthrc1	Cr2	Cep295
Mcat	Gpsm2	Nab2	Ctla2a	Crabp1	Cep295nl
Mcee	Gpsm3	Nabp1	Ctnna1	Crat	Cep350
Mcfd2	Gpx1	Nacc2	Ctnna2	Crb3	Cep41
Mcl1	Gpx2	Nadk	Ctnnal1	Crbn	Cep44
Mcm3	Gpx3	Nadk2	Ctnnb1	Creb3	Cep57
Mcm4	Gpx7	Nae1	Ctnnbip1	Creb3l1	Cep70
Mcm5	Gramd1b	Nagk	Ctnnd2	Creb5	Cep72
Mcm6	Grb14	Naglu	Ctns	Crebbp	Cep76
Mcpt1	Grb2	Nags	Ctps1	Crebl2	Cep78
Mcpt4	Grcc10	Nap1l5	Ctps2	Crebrf	Cep83
Mdfic	Greb1	Napg	Ctrb1	Crebzf	Cep95
Mdh1	Grem2	Naprt	Ctrc	Creg1	Cep97
Mdm2	Grhpr	Napsa	Ctrl	Creg2	Cercam
Me1	Gria1	Nars	Ctsa	Creld2	Cerk
Me3	Gria2	Nbea	Ctsb	Crem	Cers2
Med13l	Gria3	Nbeal2	Ctsc	Crhbp	Cers4
Med14	Gria4	Nbl1	Ctsd	Crhr1	Cers5
Med15	Grik1	Ncald	Ctse	Crip1	Cers6
Med19	Grik2	Ncapd2	Ctsf	Cript	Ces1d
Med29	Grik4	Ncapg	Ctsh	Crispld2	Ces1e
Medag	Grin1	Ncaph	Ctsk	Crk	Ces5a
Mef2c	Grin2c	Ncaph2	Ctsl	Crlf1	Cetn2
Megf11	Grin3a	Nck1	Ctso	Crlf2	Cetn4
Memo1	Grk4	Nckap1	Ctsw	Crlf3	Cfap100
Mep1a	Grk6	Nckap1l	Ctsz	Crmp1	Cfap126
Mettl7a	Grm1	Nckipsd	Cttn	Crot	Cfap161
Mettl9	Grm3	Ncln	Cttnbp2	Crp	Cfap36
Mff	Grm4	Ncoa3	Cttnbp2nl	Crtac1	Cfap45
Mfrp	Grm8	Ncstn	Ctu2	Crtc1	Cfap52
Mfsd12	Grn	ND3	Ctxn1	Cry1	Cfap69
Mfsd5	Grp	ND4	Ctxn2	Cry2	Cfb
Mfsd6	Grpcb///Grpca	ND4///ND4L	Cubn	Cryaa	Cfd
Mgarp	Grpel2	ND5	Cuedc1	Cryab	Cfdp1
Mgat5	Grtp1	Ndnf	Cuedc2	Cryba1	Cfh
MGC105649	Gsap	Ndrg1	Cul2	Crybb1	Cfhr1
MGC109340	Gsg1l	Ndufa10///Ndufa10l1	Cul3	Cryga	Cfi
MGC94199	Gsk3b	Ndufa10l1	Cul5	Crygc	Cfl1
Mgll	Gsn	Ndufa4	Cux1	Crygn	Cfl2
Mgp	Gsr	Ndufaf7	Cux2	Crym	Cflar
Mib2	Gsta1	Ndufc2	Cwc22	Cryz	Cfp
Mina	Gsta3	Ndufs3	Cwc27	Cryzl1	Cggbp1
Miox	Gsta4	Ndufs4	Cx3cl1	Cs	Cgm4
Mir29c	Gsta5///Gsta2	Ndufv1	Cxadr	Csdc2	Cgn
Misp3	Gstk1	Nebl	Cxcl1	Csf1	Cgref1
Mki67	Gstm1	Necab2	Cxcl11	Csf1r	Cgrrf1
Mkks	Gstm4	Necab3	Cxcl12	Csf2	Ch25h
Mkrn1	Gstm5	Necap1	Cxcl13	Csf2ra	Chac1
Mlc1	Gstm7	Necap2	Cxcl16	Csf2rb	Chac2
Mlec	Gsto1	Nedd4l	Cxcl2	Csf3	Chad
Mllt10	Gstt2	Nek6	Cxcl3	Csf3r	Chadl
Mlnr	Gstt3	Nek9	Cxcr2	Csgalnact1	Chaf1a
Mlx	Gstz1	Nell2	Cxcr3	Csgalnact2	Chaf1b
Mlycd	Gtdc1	Neto2	Cxcr4	Csn2	Champ1
Mmd	Gtf2h1	Neurl1b	Cxxc1	Csnk1a1	Chat
Mmp11	Gtf2h2	NEWGENE_1305243	Cxxc4	Csnk1d	Chchd10
Mmp3	Gtf2h5	Nfatc1	Cxxc5	Csnk1e	Chchd2
Mmp9	Gtf3a	Nfkb1	Cyb561	Csnk1g3	Chchd5
Mmrn1	Gtf3c1	Nfkb2	Cyb561a3	Csnk2a1	Chchd6
Mns1	Gtf3c5	Nfkbia	Cyb561d1	Csnk2a2	Chchd7
Mob3a	Gtpbp6	Nfkbie	Cyb5b	Csnk2b	Chd1
Mobp	Guca2b	Nfkbiz	Cyb5r2	Cspg5	Chd1l
Mocs2	Gucd1	Nfrkb	Cyb5r3	Csrnp1	Chd2
Mog	Gucy1a3	Nfs1	Cyb5r4	Csrnp2	Chd3
Mospd3	Gucy1b3	Nfya	Cyba	Csrnp3	Chd4
Mpc1	Gucy2e	Nfyb	Cybb	Csrp1	Chd6
Mpdz	Guk1	Ngef	Cybrd1	Csrp2	Chd7
Mphosph10	Gusb	Ngrn	Cyc1	Csrp3	Chd8
Mphosph8	Gyg1	Nhlrc2	Cyfip1	Cst12	Chd9
Mppe1	Gzmn	Nhlrc3	Cyfip2	Cst3	Chdh
Mpped1	H19	Nhp2	Cygb	Cst7	Chek1
Mpz	H2afx	Nid1	Cyhr1	Cstb	Chek2
Mrc1	H2afy	Nid2	Cym	Cstf2	Chfr
Mrgprf	H2afy2	Nif3l1	Cyp1b1	Cstf3	Chga
Mro	H2afz	Nim1k	Cyp20a1	Ctbp1	Chgb
Mrpl12	H3f3b	Nip7	Cyp26a1	Ctbp2	Chi3l1
Mrpl13	Habp4	Nipa2	Cyp26b1	Ctbs	Chia
mrpl24	Hacd1	Nipsnap1	Cyp27a1	Ctdnep1	Chic1
Mrpl27	Hacd3	Nipsnap3b	Cyp2d3	Ctdsp1	Chic2
Mrpl38	Hacl1	Nit2	Cyp2d4	Ctdsp2	Chka
Mrpl41	Hagh	Nkd1	Cyp2d5///Cyp2d1	Ctdspl	Chkb
Mrpl42	Hao2	Nkrf	Cyp2j10	Ctdspl2	Chl1
Mrpl49	Hars	Nlk	Cyp2j3	Ctf1	Chmp1a
Mrps14	Haus5	Nlrx1	Cyp2t1	Ctgf	Chmp1b
Mrps18b	Hba2///Hba1	Nmb	Cyp2u1	Cth	Chmp2a
Mrps2	Hbe2///Hbg1	Nme4	Cyp3a18	Cthrc1	Chmp2b
Mrps22	Hbegf	Nmi	Cyp3a9	Ctla2a	Chmp3
Ms4a6a	Hck	Nmnat3	Cyp46a1	Ctla4	Chmp4c
Msln	Hcls1	Nomo1	Cyp4f1	Ctnna1	Chmp5
Msn	Hcn1	Notch1	Cyp4f17	Ctnna2	Chmp6
Msrb2	Hcrtr2	Npas2	Cyp4f5	Ctnnal1	Chmp7
Mst1	Hdac1	Npat	Cyp4f6	Ctnnb1	Chn1
Mt1f///Ttr///Mt1	Hdac4	Npc2	Cyp4v3	Ctnnbip1	Chn2
Mt1m///Mt2A	Hdac7	Npepl1	Cyp51	Ctnnd2	Chodl
Mt2A	Hdc	Npl	Cyp7b1	Ctns	Chp1
Mt3	Hdgfrp3	Nprl2	Cyr61	Ctps1	Chpf2
Mt4	Hdhd3	Nptxr	CYTB	Ctps2	Chpt1
Mtf1	Hdlbp	Npy1r	Cyth3	Ctrb1	Chrac1
Mtfr1l	Heatr5a	Nr2f6	Cytip	Ctrc	Chrd
Mthfd2	Heatr5b	Nr3c2	Cyyr1	Ctrl	Chrdl2
Mthfr	Hebp1	Nr5a1	Daam1	Ctsa	Chrm1
Mtmr1	Hectd4	Nrip3	Daam2	Ctsb	Chrm2
Mtmr10	Hecw2	Nrp1	Dab1	Ctsc	Chrm3
Mtmr7	Herc3	Nrxn3	Dab2	Ctsd	Chrm4
Mto1	Herc4	Nsa2	Dach1	Ctse	Chrna1
Mum1	Herc6	Nsd1	Dact1	Ctsh	Chrna10
Mus81	Hes5	Nsdhl	Dact2	Ctsk	Chrna2
Mxi1	Hexa	Nsf	Dact3	Ctsl	Chrna4
Mybl2	Hexb	Nsg2	Dag1	Ctso	Chrna5
Myc	Hexim2	Nsmce2	Daglb	Ctss	Chrnb1
Mycbp2	Hfe2	Nsmce4a	Dao	Ctsw	Chrnb2
Myct1	Hgsnat	Nt5c///LOC688261	Dap	Ctsz	Chrne
Mydgf	Hhatl	Nt5c3a	Dap3	Cttn	Chst1
Myh1	Hhipl1	Nt5dc2	Dapk1	Cttnbp2	Chst10
Myh10	Hid1	Nt5e	Dapk2	Cttnbp2nl	Chst11
Myh11	Hif1a	Nt5m	Dapk3	Ctu2	Chst12
Myh2///Myh4	Hip1	Ntn1	Dapp1	Ctxn1	Chst14
Myh6	Hip1r	Nubp1	Dars	Ctxn2	Chst2
Myh9	Hipk3	Nubp2	Dars2	Cubn	Chst4
Myl12a	Hist1h1c	Nucks1	Dazap1	Cuedc1	Chst5
Myl2	Hist1h1t	Nudcd2	Dbi	Cuedc2	Chst8
Myl6b///Myl6///Myl6l	Hist1h2af	Nudt21	Dbndd1	Cul2	Chsy1
Myl9	Hist1h2bh	Nudt3	Dbndd2	Cul3	Chtf18
Mylk2	Hist1h4a	Nudt8	Dbp	Cul5	Chtf8
Myof	Hist1h4m	Nudt9	Dbr1	Cul9	Chtop
Myog	Hist3h2a	Nufip2	Dcaf12	Cuta	Churc1
Myt1	Hivep2	Numa1	Dcaf13	Cux1	Ciao1
Myt1l	Hjurp	Nup37	Dcaf15	Cux2	Cib1
Naa10	Hk2	Nus1	Dcaf17	Cuzd1	Cib2
Naa25	Hlf	Nutf2	Dcaf5	Cwc15	Cic
Nabp1	Hmg1l1///Hmgb1	Nxn	Dcaf6	Cwc22	Cidea
Nacc2	Hmga1	Nxnl2	Dcaf8	Cwc27	Cideb
Nadk2	Hmgb1	Nxph3	Dcbld2	Cx3cl1	Ciita
Nae1	Hmgb2	Nxph4	Dck	Cx3cr1	Cilp2
Naglu	Hmgcr	Oaf	Dclk1	Cxadr	Cinp
Nampt	Hmgcs1	Oas1f///Oas1i	Dclk2	Cxcl1	Cipc
Nap1l5	Hmgcs2	Obscn	Dclk3	Cxcl10	Cir1
Napg	Hmgn1	Obsl1	Dclre1a	Cxcl11	Cirbp
Napsa	Hmgn2	Ogfod1	Dclre1b	Cxcl12	Cisd1
Nav2	Hmgn3	Ogfod3	Dclre1c	Cxcl13	Cisd2
Nbea	Hmgn5b	Olfml2a	Dcn	Cxcl14	Cish
Nbeal2	Hmmr	Olfml3	Dcps	Cxcl16	Cit
Ncam1	Hmox1	Omg	Dctd	Cxcl2	Cited1
Ncaph	Hmox2	Ooep	Dctn1	Cxcl3	Cited2
Ncaph2	Hn1	Opa1	Dctn3l1///Dctn3	Cxcl6	Cited4
Nceh1	Hnmt	Opalin	Dctn6	Cxcl9	Ciz1
Ncl	Hnrnpa1	Oplah	Dctpp1	Cxcr1	Ckap4
Ncln	Hnrnpa3	Orai2	Dcun1d1	Cxcr2	Ckap5
Ncor1	Hnrnpab	Orai3	Dcun1d2	Cxcr3	Ckb
Ncs1	Hnrnpc	Ormdl1	Dcun1d4	Cxcr4	Cklf
ND2	Hnrnpdl	Os9	Dcun1d5	Cxcr5	Ckm
ND4///ND4L	Hnrnpf	Osbp	Dcx	Cxxc4	Ckmt1b
ND5	Hnrnph3	Osbpl11	Dda1///LOC682635	Cxxc5	Cks1b
Ndrg1	Hnrnpk	Osbpl1a	Ddah1	Cyb561	Cks2
Ndrg2	Hnrnpl	Osbpl2	Ddah2	Cyb561a3	Clasp1
Ndrg3	Hnrnpu	Osbpl6	Ddb1	Cyb5b	Clasp2
Ndrg4	Hnrnpul1	Osbpl8	Ddb2	Cyb5r2	Clasrp
Ndufa13	Hoga1	Oser1	Ddc	Cyb5r3	Clca1
Ndufa4l2	Homer1	Ost4	Ddhd1	Cyb5r4	Clca2
Ndufa8	Homer2	Ostf1	Ddhd2	Cyba	Clca4
Ndufaf7	Homer3	Otulin///LOC64038	Ddi2	Cybb	Clca4l
Ndufb5	Hook1	Oxct1	Ddias	Cybrd1	Clcc1
Ndufb8	Hook3	Oxr1	Ddost	Cyc1	Clcf1
Ndufc2	Hopx	Oxt	Ddr1	Cyfip1	Clcn1
Ndufs4	Hoxb1	P3h3	Ddr2	Cyfip2	Clcn2
Ndufv2	Hoxb2	P4ha1	Ddrgk1	Cygb	Clcn3
Nebl	Hoxb6	P4htm	Ddt	Cyhr1	Clcn4
Necab2	Hoxb7	Pa2g4	Ddx17	Cyld	Clcn6
Necap1	Hoxc4	Pabpc1	Ddx18	Cyp11b1	Clcn7
Nectin4	Hoxd3	Pabpc4	Ddx19b	Cyp19a1	Clcnka
Nedd1	Hoxd4	Pacs1	Ddx19b///Ddx19a	Cyp1a2	Cldn1
Nefh	Hoxd8	Pacs2	Ddx20	Cyp1b1	Cldn10
Nefl	Hoxd9	Paip1	Ddx21	Cyp20a1	Cldn11
Nefm	Hpcal4	Pak1	Ddx25	Cyp26a1	Cldn12
Nek6	Hpdl	Pak1ip1	Ddx27	Cyp26b1	Cldn17
Nelfe	Hpgd	Pak4	Ddx28	Cyp27a1	Cldn18
Nell2	Hprt1	Palmd	Ddx31	Cyp27b1	Cldn2
Nes	Hps1	Pamr1	Ddx39a	Cyp2a2///Cyp2a1	Cldn22
Neurl1b	Hps4	Pan2	Ddx39b	Cyp2c11	Cldn3
NEWGENE_1305243	Hpse	Pank1	Ddx46	Cyp2c22	Cldn4
Nexn	Hrh1	Papd4	Ddx47	Cyp2d2	Cldn5
Nfasc	Hrh3	Paqr4	Ddx49	Cyp2d4	Cldn6
Nfe2	Hrk	Paqr8	Ddx5	Cyp2d5///Cyp2d1	Cldn7
Nfib	Hs2st1	Pard3	Ddx50	Cyp2g1	Cldnd1
Nfkb2	Hs3st6	Pard6a	Ddx52	Cyp2j10	Clec10a
Nfkbia	Hsd17b13	Parn	Ddx54	Cyp2j3	Clec11a
Nfkbie	Hsd17b2	Parp16	Ddx56	Cyp2j4	Clec12a
Nfkbiz	Hsd17b4	Parp4///Mphosph8	Ddx59	Cyp2t1	Clec14a
Nfrkb	Hsd17b7	Parp6	Ddx60	Cyp2u1	Clec16a
Nfya	Hsd3b7	Parvb	Deaf1	Cyp3a9	Clec1a
Nfyb	Hsf1	Pax4	Dedd	Cyp46a1	Clec1b
Nhp2	Hsp90ab1	Paxbp1	Def8	Cyp4b1	Clec2d
Nicn1	Hsp90b1	Pbdc1	Defa5	Cyp4f1	Clec2l
Nid1	Hspa12a	Pbld1	Degs2	Cyp4f17	Clec3b
Nif3l1	Hspa13	Pbxip1	Dek	Cyp4f5	Clec4a
Nifk	Hspa1a	Pcdha11///Pcdhac2///Pcdhac1///Pcdha9///Pcdha7///Pcdha6///Pcdha5///Pcdha2///Pcdha1///Pcdha8///Pcdha3///Pcdha12///Pcdha10///Pcdha13///Pcdha4	Dennd1c	Cyp4f6	Clec4a1
Ninj1	Hspa1b///Hspa1a	Pcgf2	Dennd2a	Cyp4v3	Clec4a3
Nip7	Hspa5	Pck1	Dennd2c	Cyp51	Clec4f
Nipa2	Hspb1	Pcmt1	Dennd2d	Cyp8b1	Clec7a
Nipsnap3b	Hspb8	Pcnp	Dennd3	Cyr61	Clec9a
Nkain1	Hspbap1	Pcnx1	Dennd5a	Cysltr1	Clic1
Nkd2	Hspbp1	Pcolce	Dennd6a	Cystm1	Clic2
Nle1	Hspd1	PCOLCE2	Dennd6b	Cyth1	Clic3
Nme3	Hsph1	Pcsk1n	Denr	Cyth3	Clic4
Nmrk2	Htatip2	Pcsk4	Depdc1	Cytip	Clint1
Nob1	Htr1b	Pcyt1a	Depdc5	Daam1	Clip1
Noct	Htr1f	Pdcd6ip	Depdc7	Daam2	Clip2
Nog	Htr2a	Pde4c	Dera	Dab1	Clip4
Nol12	Htr2b	Pde6b	Derl2	Dab2	Clk1
Nolc1	Htr2c	Pde6h	Des	Dach1	Clk2
Nop14	Htr3a	Pde8a	Desi1	Dact1	Clk4
Nop16	Htr7	Pde9a	Desi2	Dact3	Clmp
Nop56	Htra2	Pdgfra	Det1	Dag1	Cln3
Nop58	Htra3	Pdgfrl	Deup1	Dao	Cln5
Nos1	Hus1	Pdhb	Dgat1	Dap	Cln6
Nos1ap	Huwe1	Pdik1l	Dgat2	Dapk1	Cln8
Nos2	Hvcn1	Pdk1	Dgcr14	Dapk2	Clock
Nos3	Iah1	Pdk4	Dgcr6	Dapl1	Clp1
Nox4	Iapp	Pdlim2	Dgcr8	Dapp1	Clpb
Np4	Iars	Pdlim4	Dgkb	Dars	Clpp
Npdc1	Ibsp	Pdlim7	Dgkd	Dbh	Clps
Npepl1	Ica1	Pds5a	Dgke	Dbi	Clptm1
Npepo	Icam1	Pds5b	Dgkg	Dbil5	Clstn1
Nppa	Icam2	Pdss2	Dgkh	Dbndd1	Clstn2
Nppb	Icos	Pdzk1	Dgki	Dbndd2	Clstn3
Nppc	Id4	Pecam1	Dgkk	Dbp	Clta
Nptn	Idh2	Pef1	Dgkq	Dbr1	Cltb
Nptx2	Idh3a	Peli1	Dguok	Dbt	Cluap1
Npw	Idh3B	Peo1	Dhcr7	Dcaf10	Cluh
Npy5r	Idi1	Pepd	Dhfr	Dcaf12	Clybl
Nr0b2	Ier2	Pepd///Egfr	Dhh	Dcaf13	Cma1
Nr1d1	Ier3	Perp	Dhodh	Dcaf15	Cmah
Nr1d2	Ier5	Pex1	Dhps	Dcaf17	Cmas
Nr1h4	Iffo1	Pfdn2	Dhrs1	Dcaf5	Cmbl
Nr2c2	Iffo2	Pfdn5	Dhrs11	Dcaf6	Cmc2
Nr2c2ap	Ifi27	Pfn2	Dhrs3	Dcaf8	Cmip
Nr3c1	Ifi30	Pgap3	Dhrs4	Dcbld2	Cmklr1
Nr3c2	Ifi47	Pgbd5	Dhrs9	Dchs1	Cmpk1
Nr4a2	Ifitm1	Pgghg	Dhtkd1	Dck	Cmpk2
Nrep	Ifitm10	Pgls	Dhx30	Dclk1	Cmtm2a
Nrp2	Ifitm2	Pgm2	Dhx35	Dclk2	Cmtm3
Nrxn1	Ifitm3	Pgm2l1	Dhx36	Dclk3	Cmtm5
Nsa2	Ifnar1	Pgp	Dhx38	Dclre1a	Cmtm6
Nsdhl	Ifnar2	Pgr	Dhx57	Dclre1b	Cmtm7
Nsf	Ifngr1	Phactr4	Dhx58	Dclre1c	Cmtm8
Nsg2	Ifngr2	Phb	Dhx8	Dcm5	Cmya5
[truncated: 11,133 more rows]
