# Supplementary material for: MicroRNA-138-5p Targets Pro-Apoptotic Factors and Favors Neural Cell Survival: Analysis in the Injured Spinal Cord
Source: Biomedicines. 2022 Jun 30;10(7):1559. doi: 10.3390/biomedicines10071559 (PMC9312482; doi:10.3390/biomedicines10071559)
Supplement: Supplementary file 1 [file biomedicines-10-01559-s001.zip › Table S4. M. Maza and Barreda-Manso et al..xls]

## Sheet: S4. Predicted targ Dysregulated
Article title: MicroRNA-138-5p targets pro-apoptotic factors and favours neural cell survival: analysis in the injured spinal cord
Authors: Rodrigo M Maza, M. Asunción Barreda-Manso, David Reigada, Agata Silván, Teresa Muñoz-Galdeano, Altea Soto, Ángela del Águila, Manuel Nieto-Diaz
Supplementary Table S4. List of miR-138-5p targets dysregulated after SCI. List of predicted miR-138-5p targets (Supplementary Table S2) that become dysregulated after injury (Supplementary Table S3).
dysregulated after SCI (13129)	predicted by all algorithms (209)	dysregulated and predicted (176)
A2m	Abcd2	Abcd2
A3galt2	Abcg1	Abcg1
AA926063	Adam17	Adam17
Aaas	Afap1	Afap1
Aacs	Akap2	Akap2
Aadat	Aldh1a1	Aldh1a1
Aaed1	Alx1	Ap3m1
Aagab	Ankrd54	Arc
Aak1	Ap3m1	Arhgap4
Aanat	Arc	Arl2
Aar2	Arhgap4	Arl2bp
Aard	Arl2	Arnt2
Aars	Arl2bp	Atg7
Aarsd1	Arl5b	Atp1b4
Aasdh	Arnt2	Atp4b
Aasdhppt	Atg7	Axin1
Aass	Atp1b4	Bak1
Aatf	Atp4b	Cacna1b
Aatk	Axin1	Calb2
Abat	Bak1	Casp3
Abca1	Bhmt	Casp7
Abca2	Cabp7	Casq2
Abca4	Cacna1b	Cav3
Abca5	Calb2	Cbx7
Abca7	Casp3	Ccdc134
Abca8	Casp7	Ccl24
Abca8a	Casq2	Ccna1
Abcb10	Cav3	Ccnjl
Abcb1a	Cbx7	Cdc25a
Abcb1b	Ccdc134	Cdk10
Abcb4	Ccl24	Cdyl
Abcb6	Ccna1	Clip1
Abcb8	Ccnjl	Clip2
Abcb9	Ccr9	Cmklr1
Abcc1	Cdc25a	Cnot8
Abcc2	Cdk10	Cntn2
Abcc3	Cdyl	Coq10b
Abcc4	Clic5	Cpsf4
Abcc5	Clip1	Creb3l1
Abcc8	Clip2	Cstf1
Abcc9	Clns1a	Ctsh
Abcd1	Cmklr1	Cttn
Abcd2	Cnot8	Cyp11b1
Abcd3	Cntn2	Dap
Abcd4	Coq10b	Dync1li2
Abce1	Cpsf4	Dynlt1
Abcf1	Creb3l1	Emb
Abcf2	Cstf1	Emp1
Abcf3	Ctsh	F2rl2
Abcg1	Cttn	Fabp3
Abcg2	Cyp11b1	Fermt2
Abcg3l1	Cyp1a1	Fkbp5
Abcg4	Dap	Fmo2
Abcg8	Dbnl	Frs3
Abhd1	Derl1	Gabrb1
Abhd10	Dnajc5g	Gatad2a
Abhd11	Dph2	Gja5
Abhd11os	Dusp13	Gna12
Abhd12	Dync1li2	Gnai2
Abhd13	Dynlt1	Gnrhr
Abhd14a	Eif4ebp2	Gosr1
Abhd14b	Emb	Gosr2
Abhd16a	Emp1	H3f3b
Abhd17a	F2rl2	Hspb1
Abhd17b	Fabp3	Icam1
Abhd17c	Fam149b1	Id4
Abhd18	Fam71b	Ide
Abhd2	Fermt2	Igfbp2
Abhd3	Fkbp5	Ikbkb
Abhd4	Fmo2	Ina
Abhd5	Frs3	Ipmk
Abhd6	Gabrb1	Itpkc
Abhd8	Gatad2a	Josd1
Abi2	Gja5	Kcnk15
Abi3	Gna12	Kcnk3
Abi3bp	Gnai2	Klf11
Ablim1	Gnrhr	Krt19
Ablim2	Gosr1	Laptm5
Ablim3	Gosr2	Limk1
Abo	H3f3b	Ltbr
Abr	Hif3a	Luzp1
Abra	Hspb1	Lypla1
Abracl	Icam1	Map1lc3a
Abt1	Id4	Mb
Abtb1	Ide	Men1
Abtb2	Igfbp2	Mfap4
Acaa1b	Ikbkb	Mgat1
Acaa2	Ina	Mmd
Acaca	Ipmk	Mras
Acad10	Itpkc	Mrrf
Acad11	Jmjd8	Ndrg3
Acad8	Josd1	Nkx6-1
Acad9	Kcnk15	Nppc
Acadl	Kcnk3	Nr3c1
Acadm	Kcns1	Nr4a3
Acads	Klf11	Nucb1
Acadsb	Klkb1	Nutf2
Acadvl	Krt19	Oaf
Acan	Laptm5	Olig1
Acap1	Limk1	Osbpl2
Acap3	Ltbr	Pa2g4
Acat1	Luzp1	Padi2
Acat2	Lypla1	Pcsk2
Acbd3	Map1lc3a	Pde2a
Acbd4	Mb	Pdgfrb
Acbd5	Mbtps2	Pdrg1
Acbd6	Men1	Pex14
Accs	Mfap4	Phf5a
Acd	Mgat1	Pitpnb
Acer2	Mgrn1	Plbd2
Acer3	Mmd	Plce1
Ache	Mras	Plekhm1
Acin1	Mrrf	Podxl
Ackr1	Mtl5	Polm
Ackr3	Ndrg3	Ppard
Ackr4	Nfyc	Ppic
Acly	Nkx6-1	Ppp1ca
Acmsd	Nppc	Prr3
Aco1	Nr3c1	Ptk2
Aco2	Nr4a3	Pttg1ip
Acot1	Nucb1	Pxmp2
Acot13	Nutf2	Rab31
Acot2	Oaf	Rara
Acot3	Olig1	Raver1
Acot4	Osbpl2	Rbck1
Acot7	Pa2g4	Rcan2
Acot8	Padi2	Reep6
Acot9	Pcsk2	Rela
Acox3	Pde2a	Rell2
Acp1	Pdgfrb	Rhoq
Acp2	Pdrg1	Rnf181
Acp5	Pex14	Rnf185
Acp6	Phf5a	Rrp15
Acpp	Pitpnb	Sema4a
Acr	Plbd2	Shisa5
Acrbp	Plce1	Shox2
Acrv1	Plekhm1	Slc23a2
Acsbg1	Podxl	Slc25a1
Acsf2	Polm	Slc25a10
Acsl1	Ppard	Slc25a25
Acsl3	Ppic	Slc35b2
Acsl4	Ppp1ca	Slc39a3
Acsl5	Prr3	Slc39a7
Acsl6	Ptk2	Slc46a1
Acsm1	Ptp4a1	Slc6a1
Acsm3	Pttg1ip	Slc6a8
Acss1	Pxmp2	Smpd3
Acss2	Pxmp4	Snap29
Acss3	Rab31	Sncb
Acta1	Rara	Sorbs2
Acta2	Raver1	St3gal2
Actb	Rbck1	Stra6
Actc1	Rcan2	Syt15
Actg1	Reep6	Tax1bp3
Actg2	Rela	Tbc1d14
Actl6a	Rell2	Tbkbp1
Actl6b	Rhoq	Tbrg1
Actl7b	Rnf181	Tex264
Actn1	Rnf185	Tgfbr3
Actn2	Rrp15	Tgm2
Actn3	Sar1b	Thrb
Actn4	Sdccag8	Tifab
Actr10	Sema4a	Tmem106c
Actr1a	Shisa5	Tmem206
Actr1b	Shox2	Tmem43
Actr2	Shpk	Tnfaip1
Actr3	Slc23a2	Tox4
Actr3b	Slc25a1	Tp53
Actr6	Slc25a10	Tpp1
Actr8	Slc25a25	Txnip
Acvr1	Slc35b2	Uimc1
Acvr1b	Slc39a3	Unc5c
Acvr1c	Slc39a7	Usf2
Acvr2a	Slc46a1	Wipf1
Acvr2b	Slc6a1	Wsb1
Acvrl1	Slc6a8	Xrcc5
Acy1	Smpd3
Acy3	Snap29
Acyp1	Sncb
Acyp2	Sorbs2
Ada	St3gal2
Adam10	Stra6
Adam11	Syt15
Adam15	Tax1bp3
Adam17	Tbc1d14
Adam19	Tbkbp1
Adam1a	Tbrg1
Adam22	Tex264
Adam23	Tgfbr3
Adam32	Tgm2
Adam33	Thrb
Adam6	Tifab
Adam8	Tmem106c
Adam9	Tmem156
Adamts1	Tmem186
Adamts10	Tmem206
Adamts12	Tmem43
Adamts15	Tnfaip1
Adamts16	Tox4
Adamts17	Tp53
Adamts19	Tpp1
Adamts2	Txnip
Adamts4	Uimc1
Adamts5	Unc5c
Adamts6	Usf2
Adamts7	Vtcn1
Adamts8	Wipf1
Adamts9	Wsb1
Adamtsl1	Xrcc5
Adamtsl2
Adamtsl4
Adamtsl5
Adap1
Adap2
Adar
Adarb1
Adarb2
Adat3
Adck1
Adck2
Adcy10
Adcy2
Adcy3
Adcy4
Adcy5
Adcy6
Adcy8
Adcyap1
Adcyap1r1
Add1
Add2
Add3
Adgra1
Adgra2
Adgra3
Adgrb1
Adgrb2
Adgrb3
Adgrd1
Adgre1
Adgre5
Adgrf4
Adgrf5
Adgrg1
Adgrg2
Adgrg5
Adgrg6
Adgrl1
Adgrl2
Adgrl3
Adgrl4
Adgrv1
Adh1
Adh4
Adh5
Adh6a
Adhfe1
Adi1
Adig
Adipoq
Adipor1
Adipor2
Adk
Adm
Adnp
Adora1
Adora2a
Adora2b
Adpgk
Adprh
Adprhl1
Adprhl2
Adprm
Adra1b
Adra1d
Adra2a
Adra2b
Adra2c
Adrb1
Adrb2
Adsl
Adss
Adssl1
Adtrp
Aebp1
Aebp2
Aen
Aes
Afap1
Afap1l1
Afap1l2
Afdn
Aff1
Aff2
Aff3
Aff4
Afg3l1
Afg3l2
Afm
Afmid
Afp
Aftph
Aga
Agap1
Agap2
Agap3
Agbl3
Ager
Agfg1
Aggf1
Agk
Agl
Agmat
Agmo
Agpat1
Agpat2
Agpat3
Agpat4
Agpat5
Agps
Agr2
Agrn
Agt
Agtpbp1
Agtr1a
Agtr1b
Agtr2
Agtrap
Agxt
Agxt2
Ahctf1
Ahcy
Ahcyl1
Ahcyl2
Ahdc1
Ahi1
Ahnak
Ahr
Ahrr
Ahsa1
Ahsg
Ahsp
Aida
Aif1
Aif1l
Aifm2
Aifm3
Aig1
Aimp1
Aimp2
Aip
Aipl1
Ajap1
Ajuba
Ak1
Ak2
Ak3
Ak4
Ak6
Ak7
Akain1
Akap1
Akap10
Akap11
Akap12
Akap13
Akap14
Akap2
Akap3
Akap5
Akap6
Akap7
Akap8l
Akap9
Akip1
Akirin1
Akna
Akr1b1
Akr1b10
Akr1b7
Akr1b8
Akr1c1
Akr1c14
Akr1c19
Akr1c3
Akr1cl
Akr1d1
Akr1e2
Akr7a3
Akt1
Akt2
Akt3
Aktip
Alad
Alas1
Alas2
Alb
Alcam
Aldh16a1
Aldh18a1
Aldh1a1
Aldh1a2
Aldh1a3
Aldh1a7
Aldh1b1
Aldh1l1
Aldh1l2
Aldh2
Aldh3a1
Aldh3a2
Aldh3b1
Aldh4a1
Aldh5a1
Aldh6a1
Aldh7a1
Aldh9a1
Aldoa
Aldob
Aldoc
Alg10
Alg12
Alg13
Alg14
Alg2
Alg3
Alg5
Alg8
Alg9
Alk
Alkbh1
Alkbh2
Alkbh3
Alkbh4
Alkbh5
Alkbh7
Alox12
Alox15
Alox5
Alox5ap
Aloxe3
Alpi
Alpk3
Alpl
Als2cl
Alx3
Alyref
Amacr
Ambp
Ambra1
Amd1
Amdhd2
Amelx
Amer2
Amer3
Amfr
Amh
Amhr2
Amigo1
Amigo3
Ammecr1l
Amn
Amn1
Amot
Amotl1
Amotl2
Ampd1
Ampd2
Ampd3
Amt
Amz2
Anapc1
Anapc10
Anapc15
Anapc4
Anapc5
Anapc7
Ang
Angel1
Angel2
Angpt1
Angpt2
Angpt4
Angptl1
Angptl2
Angptl3
Angptl4
Angptl6
Angptl8
Ank1
Ank2
Ank3
Ankh
Ankhd1
Ankib1
Ankle2
Ankmy2
Ankrd1
Ankrd10
Ankrd11
Ankrd13a
Ankrd13b
Ankrd13c
Ankrd13d
Ankrd16
Ankrd17
Ankrd2
Ankrd23
Ankrd24
Ankrd28
Ankrd33b
Ankrd34a
Ankrd34b
Ankrd35
Ankrd36
Ankrd37
Ankrd40
Ankrd42
Ankrd44
Ankrd45
Ankrd46
Ankrd49
Ankrd50
Ankrd52
Ankrd53
Ankrd55
Ankrd6
Ankrd60
Ankrd9
Anks1a
Anks1b
Anks3
Anks4b
Anln
Ano1
Ano3
Ano4
Ano5
Ano6
Ano9
Anp32a
Anp32b
Anp32e
Anpep
Antxr1
Antxr2
Anxa1
Anxa11
Anxa2
Anxa3
Anxa4
Anxa5
Anxa7
Anxa8
Aoc1
Aoc3
Aox1
Ap1b1
Ap1g1
Ap1g2
Ap1m1
Ap1m2
Ap1s1
Ap1s2
Ap1s3
Ap2a2
Ap2b1
Ap2s1
Ap3b1
Ap3b2
Ap3m1
Ap3m2
Ap3s1
Ap3s2
Ap4s1
Ap5s1
Ap5z1
Apaf1
Apba1
Apba2
Apba3
Apbb1
Apbb1ip
Apbb2
Apbb3
Apc
Apc2
Apeg3
Apeh
Apex2
Aph1a
Api5
Apitd1
Aplf
Apln
Aplnr
Aplp1
Aplp2
Apmap
Apoa1
Apoa4
Apob
Apobec1
Apobec2
Apobec3b
Apobr
Apoc2
Apoc3
Apoc4
Apod
Apoe
Apoh
Apol11a
Apol3
Apol9a
Apold1
Apom
Apon
Apoo
Apool
Apopt1
App
Appbp2
Appl1
Appl2
Aprt
Aptx
Aqp1
Aqp11
Aqp12a
Aqp2
Aqp3
Aqp4
Aqp5
Aqp6
Aqp7
Aqp9
Aqr
Ar
Araf
Arap1
Arap2
Arap3
Arc
Arcn1
Areg
Arel1
Arf1
Arf2
Arf3
Arf4
Arf5
Arf6
Arfgap1
Arfgap3
Arfgef1
Arfgef2
Arfip1
Arfip2
Arfrp1
Arg1
Arg2
Arhgap1
Arhgap10
Arhgap11a
Arhgap15
Arhgap17
Arhgap18
Arhgap19
Arhgap20
Arhgap21
Arhgap22
Arhgap23
Arhgap25
Arhgap26
Arhgap27
Arhgap28
Arhgap30
Arhgap32
Arhgap35
Arhgap39
Arhgap4
Arhgap42
Arhgap44
Arhgap45
Arhgap5
Arhgap6
Arhgap8
Arhgap9
Arhgdia
Arhgdib
Arhgdig
Arhgef10
Arhgef10l
Arhgef11
Arhgef12
Arhgef16
Arhgef17
Arhgef18
Arhgef26
Arhgef28
Arhgef3
Arhgef37
Arhgef4
Arhgef40
Arhgef5
Arhgef7
Arhgef9
Arid1a
Arid1b
Arid2
Arid3a
Arid4b
Arid5a
Arid5b
Arih1
Arih2
Arl1
Arl10
Arl11
Arl14ep
Arl16
Arl2
Arl2bp
Arl3
Arl4a
Arl4d
Arl5a
Arl5c
Arl6
Arl6ip1
Arl6ip4
Arl6ip5
Arl6ip6
Arl8a
Arl8b
Armc1
Armc10
Armc5
Armc6
Armc7
Armc8
Armc9
Armcx1
Armcx2
Armcx3
Armcx4
Armcx6
Armt1
Arnt
Arnt2
Arntl
Arntl2
Arpc1b
Arpc2
Arpc3
Arpc4
Arpc5
Arpc5l
Arpin
Arpp21
Arr3
Arrb1
Arrb2
Arrdc1
Arrdc2
Arrdc4
Arsa
Arsb
Arse
Arsg
Arsi
Art1
Art2b
Art3
Art4
Art5
Arv1
Arvcf
Arx
Arxes2
Asah1
Asah2
Asap1
Asap2
Asap3
Asb1
Asb11
Asb12
Asb13
Asb14
Asb2
Asb3
Asb8
Ascc2
Ascc3
Ascl1
Ascl3
Asf1a
Asf1b
Asgr1
Asgr2
Ash1l
Ash2l
Asic1
Asic2
Asic3
Asic4
Asl
Asna1
Asns
Asnsd1
Aspa
Aspg
Asph
Asphd2
Aspm
Aspn
Asprv1
Aspscr1
Asrgl1
Ass1
Astn1
Astn2
Asun
Asxl1
Asxl2
Asxl3
Atad2
Atad3a
Atad5
Atat1
Atcay
Atf1
Atf2
Atf3
Atf4
Atf5
Atf6
Atf7ip
Atg10
Atg12
Atg13
Atg14
Atg16l1
Atg16l2
Atg2a
Atg2b
Atg4b
Atg4d
Atg5
Atg7
Atg9a
Atic
Atl1
Atl2
Atl3
Atmin
Atoh8
Atox1
Atp10a
Atp10d
Atp11a
Atp11b
Atp12a
Atp13a1
Atp13a2
Atp13a5
Atp1a1
Atp1a2
Atp1a3
Atp1b1
Atp1b2
Atp1b3
Atp1b4
Atp23
Atp2a1
Atp2a2
Atp2a3
Atp2b1
Atp2b2
Atp2b3
Atp2b4
Atp2c1
Atp4a
Atp4b
Atp5a1
Atp5b
Atp5c1
Atp5d
Atp5e
Atp5g3
Atp5h
Atp5i
Atp5j
Atp5j2
Atp5l
Atp5o
Atp5s
Atp5sl
ATP6
Atp6ap1l
Atp6v0a1
Atp6v0a2
Atp6v0a4
Atp6v0b
Atp6v0c
Atp6v0d1
Atp6v0e1
Atp6v0e2
Atp6v1a
Atp6v1b1
Atp6v1b2
Atp6v1c1
Atp6v1c2
Atp6v1d
Atp6v1e1
Atp6v1f
Atp6v1g1
Atp6v1g2
Atp6v1h
Atp7a
Atp7b
ATP8
Atp8a1
Atp8a2
Atp8b1
Atp8b2
Atp8b4
Atp9a
Atp9b
Atpaf1
Atpaf2
Atpif1
Atr
Atraid
Atrip
Atrn
Atrnl1
Atrx
Atxn1
Atxn10
Atxn1l
Atxn2
Atxn3
Atxn7l1
Atxn7l2
Atxn7l3
Atxn7l3b
Auh
Aunip
Aup1
Aurka
Aurkb
Aurkc
Aven
Avil
Avl9
Avpi1
Avpr1a
Avpr1b
Avpr2
Axin1
Axl
Azgp1
Azi2
Azin1
Azin2
B2m
B3galnt1
B3galt4
B3galt5
B3gat1
B3gat2
B3gat3
B3glct
B3gnt2
B3gnt5
B3gnt7
B3gntl1
B4galnt1
B4galnt4
B4galt1
B4galt2
B4galt3
B4galt4
B4galt5
B4galt6
B4galt7
Baalc
Babam1
Bace2
Bach1
Bad
Bag1
Bag2
Bag3
Bag4
Bag5
Bag6
Bahd1
Baiap2
Baiap2l1
Bak1
Bambi
Banf1
Bank1
Banp
Bap1
Bard1
Barhl1
Basp1
Batf
Batf2
Batf3
Baz1a
Baz1b
Baz2a
Baz2b
Bbc3
Bbox1
Bbs1
Bbs12
Bbs2
Bbs4
Bbs5
Bbs7
Bbs9
Bcan
Bcap29
Bcar1
Bcas1
Bcas2
Bcas3
Bcat1
Bcat2
Bccip
Bcdin3d
Bche
Bckdha
Bckdhb
Bckdk
Bcl10
Bcl11a
Bcl11b
Bcl2
Bcl2a1
Bcl2l1
Bcl2l11
Bcl2l12
Bcl2l14
Bcl2l15
Bcl2l2
Bcl3
Bcl6
Bcl6b
Bcl7a
Bcl7b
Bcl7c
Bcl9
Bcl9l
Bclaf1
Bco1
Bcor
Bcr
Bcs1l
Bdh1
Bdh2
Bdkrb1
Bdkrb2
Bdnf
Bdp1
Bean1
Becn1
Begain
Bend3
Bend4
Bend5
Bend6
Bet1
Bet1l
Bex1
Bex2
Bex3
Bex4
Bfar
Bfsp1
Bfsp2
Bglap
Bgn
Bhlha15
Bhlhb9
Bhlhe22
Bhlhe40
Bhlhe41
Bicd2
Bicdl1
Bid
Bik
Bin1
Bin2
Bin2a
Bin3
Birc2
Birc3
Birc5
Birc7
Bivm
Blcap
Bles03
Blk
Blm
Blnk
Bloc1s2
Bloc1s3
Bloc1s4
Bloc1s5
Bloc1s6
Blvra
Blzf1
Bmf
Bmp1
Bmp15
Bmp2
Bmp2k
Bmp3
Bmp4
Bmp5
Bmp6
Bmp7
Bmper
Bmpr1a
Bmpr2
Bmt2
Bmyc
Bnc1
Bnc2
Bnip2
Bnip3
Bnip3l
Boc
Bod1
Bok
Bola3
Bop1
Borcs5
Borcs6
Borcs7
Borcs8
Bpgm
Bphl
Bpifa2
Bpifa2f
Bpifa5
Bpifb1
Bpifb2
Bpifb4
Bpifb6
Bpnt1
Bptf
Brap
Brca1
Brca2
Brcc3
Brd1
Brd2
Brd3
Brd4
Brd7
Brd9
Bre
Brf2
Bri3
Bri3bp
Brinp1
Brinp2
Brix1
Brms1
Brms1l
Brsk1
Brwd1
Brwd3
Bscl2
Bsg
Bsn
Bsnd
Bspry
Bst1
Bst2
Btaf1
Btbd1
Btbd10
Btbd11
Btbd16
Btbd17
Btbd2
Btbd3
Btbd6
Btbd7
Btbd8
Btbd9
Btc
Btd
Btf3
Btg1
Btg2
Btg3
Btk
Btnl8
Btnl9
Btrc
Bub1
Bub1b
Bub3
Bud13
Bud31
Bves
Bysl
Bzw1
Bzw2
C1galt1
C1galt1c1
C1qa
C1qb
C1qc
C1ql1
C1ql3
C1qtnf1
C1qtnf2
C1qtnf3
C1qtnf4
C1qtnf5
C1qtnf6
C1qtnf7
C1r
C1s
C2
C2cd2
C2cd2l
C2cd3
C2cd4a
C2cd5
C3
C3ar1
C5ar1
C6
C8a
C8b
C8g
Ca5b
Caap1
Cab39
Cables1
Cables2
Cabp1
Cabyr
Cachd1
Cacna1a
Cacna1b
Cacna1c
Cacna1d
Cacna1f
Cacna1g
Cacna1h
Cacna1i
Cacna2d1
Cacna2d3
Cacnb1
Cacnb2
Cacnb4
Cacng1
Cacng2
Cacng3
Cacng4
Cacng6
Cacng7
Cactin
Cacul1
Cacybp
Cad
Cadm1
Cadm3
Cadps
Cadps2
Cahm
Calb1
Calb2
Calca
Calcb
Calcoco1
Calcr
Calcrl
Cald1
Calhm2
Calm1
Calm2
Calml4
Calr
Calr3
Calr4
Calu
Caly
Camk1
Camk1g
Camk2a
Camk2b
Camk2d
Camk2g
Camk2n1
Camk2n2
Camk4
Camkk1
Camkmt
Camkv
Camp
Camsap1
Camsap2
Camsap3
Camta1
Camta2
Cand1
Cand2
Cant1
Canx
Cap1
Cap2
Capg
Capn1
Capn13
Capn15
Capn2
Capn3
Capn5
Capn6
Capn8
Capns1
Caprin1
Caprin2
Capza1
Capza2
Capzb
Car1
Car10
Car11
Car12
Car14
Car2
Car3
Car4
Car6
Car7
Car8
Car9
Card10
Card11
Card14
Card19
Card9
Carf
Carhsp1
Carm1
Carmil1
Carmil2
Carmil3
Cars
Cars2
Cartpt
Casc1
Casc3
Casc4
Casd1
Cask
Caskin1
Caskin2
Casp1
Casp12
Casp16
Casp2
Casp3
Casp4
Casp6
Casp7
Casp8
Casp9
Casq2
Casr
Cast
Casz1
Catsper2
Cav1
Cav2
Cav3
Cbarp
Cbfa2t2
Cbfa2t3
Cbfb
Cbl
Cblb
Cblc
Cbln1
Cbln2
Cbr3
Cbs
Cbwd1
Cbx1
Cbx5
Cbx6
Cbx7
Cby1
Cc2d1a
Cc2d1b
Cc2d2a
Ccar1
Ccbe1
Ccdc102a
Ccdc105
Ccdc106
Ccdc107
Ccdc112
Ccdc113
Ccdc115
Ccdc117
Ccdc120
Ccdc124
Ccdc125
Ccdc126
Ccdc127
Ccdc130
Ccdc134
Ccdc136
Ccdc141
Ccdc149
Ccdc153
Ccdc163
Ccdc167
Ccdc17
Ccdc174
Ccdc177
Ccdc180
Ccdc181
Ccdc184
Ccdc186
Ccdc187
Ccdc22
Ccdc24
Ccdc25
Ccdc28a
Ccdc28b
Ccdc3
Ccdc30
Ccdc32
Ccdc34
Ccdc43
Ccdc47
Ccdc51
Ccdc53
Ccdc58
Ccdc6
Ccdc61
Ccdc65
Ccdc68
Ccdc69
Ccdc71l
Ccdc77
Ccdc78
Ccdc8
Ccdc80
Ccdc81
Ccdc85b
Ccdc85c
Ccdc86
Ccdc88a
Ccdc88c
Ccdc9
Ccdc90b
Ccdc91
Ccdc92
Ccdc93
Ccdc96
Ccdc97
Cchcr1
Cck
Cckar
Cckbr
Ccl11
Ccl19
Ccl2
Ccl20
Ccl21
Ccl22
Ccl24
Ccl27
Ccl28
Ccl3
Ccl4
Ccl5
Ccl6
Ccl7
Ccl9
Ccna1
Ccna2
Ccnb1
Ccnb1ip1
Ccnb2
Ccnc
Ccnd1
Ccnd2
Ccnd3
Ccndbp1
Ccne1
Ccne2
Ccnf
Ccng1
Ccng2
Ccni
Ccnjl
Ccnl1
Ccnl2
Ccnt2
Ccny
Ccp110
Ccpg1
Ccpg1os
Ccr1
Ccr2
Ccr3
Ccr5
Ccr6
Ccr7
Ccrl2
Ccsap
Ccser2
Cct2
Cct3
Cct4
Cct5
Cct6a
Cct7
Cct8
Ccz1b
Cd14
Cd163
Cd164
Cd164l2
Cd180
Cd1d1
Cd2
Cd200
Cd200r1
Cd200r1l
Cd209b
Cd209f
Cd22
Cd24
Cd244
Cd247
Cd248
Cd276
Cd28
Cd2ap
Cd2bp2
Cd300a
Cd302
Cd33
Cd34
Cd36
Cd37
Cd38
Cd3d
Cd3e
Cd3e-ps1
Cd3eap
Cd3g
Cd4
Cd40
Cd40lg
Cd44
Cd46
Cd47
Cd48
Cd52
Cd53
Cd55
Cd59
Cd5l
Cd6
Cd63
Cd68
Cd69
Cd7
Cd74
Cd79b
Cd80
Cd82
Cd83
Cd86
Cd8a
Cd8b
Cd9
Cd93
Cd96
Cd99
Cd99l2
Cdadc1
Cdc123
Cdc14a
Cdc14b
Cdc16
Cdc20
Cdc23
Cdc25a
Cdc25b
Cdc26
Cdc27
Cdc34
Cdc37
Cdc37l1
Cdc40
Cdc42
Cdc42bpb
Cdc42ep1
Cdc42ep2
Cdc42ep3
Cdc42ep5
Cdc42se1
Cdc42se2
Cdc45
Cdc5l
Cdca2
Cdca3
Cdca4
Cdca7
Cdca7l
Cdca8
Cdcp1
Cdh1
Cdh10
Cdh11
Cdh12
Cdh13
Cdh15
Cdh16
Cdh17
Cdh2
Cdh20
Cdh22
Cdh23
Cdh3
Cdh4
Cdh5
Cdh6
Cdh7
Cdh8
Cdhr1
Cdhr2
Cdhr4
Cdhr5
Cdip1
Cdk1
Cdk10
Cdk11b
Cdk12
Cdk13
Cdk14
Cdk16
Cdk17
Cdk18
Cdk19
Cdk2
Cdk20
Cdk2ap1
Cdk2ap2
Cdk4
Cdk5
Cdk5r1
Cdk5rap1
Cdk5rap2
Cdk5rap3
Cdk7
Cdk9
Cdkal1
Cdkl2
Cdkl4
Cdkl5
Cdkn1a
Cdkn1b
Cdkn1c
Cdkn2a
Cdkn2aip
Cdkn2aipnl
Cdkn2c
Cdkn2d
Cdkn3
Cdo1
Cdon
Cdr2
Cds1
Cdt1
Cdv3
Cdx2
Cdyl
Cdyl2
Ceacam1
Ceacam11
Ceacam3
Ceacam4
Cebpa
Cebpb
Cebpd
Cebpe
Cebpg
Cebpz
Cecr6
Cel
Cela1
Cela3b
Celf1
Celf2
Celf3
Celf4
Celf5
Celsr1
Celsr2
Celsr3
Cemip
Cend1
Cenpa
Cenpb
Cenpe
Cenpf
Cenpi
Cenpj
Cenpk
Cenpl
Cenpm
Cenpn
Cenpq
Cenpt
Cenpu
Cenpv
Cenpw
Cep104
Cep126
Cep128
Cep135
Cep152
Cep162
Cep164
Cep170b
Cep19
Cep250
Cep295
Cep295nl
Cep350
Cep41
Cep44
Cep57
Cep70
Cep72
Cep76
Cep78
Cep83
Cep95
Cep97
Cercam
Cerk
Cers2
Cers4
Cers5
Cers6
Ces1d
Ces1e
Ces5a
Cetn2
Cetn4
Cfap100
Cfap126
Cfap161
Cfap36
Cfap45
Cfap52
Cfap69
Cfb
Cfd
Cfdp1
Cfh
Cfhr1
Cfi
Cfl1
Cfl2
Cflar
Cfp
Cggbp1
Cgm4
Cgn
Cgref1
Cgrrf1
Ch25h
Chac1
Chac2
Chad
Chadl
Chaf1a
Chaf1b
Champ1
Chat
Chchd10
Chchd2
Chchd5
Chchd6
Chchd7
Chd1
Chd1l
Chd2
Chd3
Chd4
Chd6
Chd7
Chd8
Chd9
Chdh
Chek1
Chek2
Chfr
Chga
Chgb
Chi3l1
Chia
Chic1
Chic2
Chka
Chkb
Chl1
Chmp1a
Chmp1b
Chmp2a
Chmp2b
Chmp3
Chmp4c
Chmp5
Chmp6
Chmp7
Chn1
Chn2
Chodl
Chp1
Chpf2
Chpt1
Chrac1
Chrd
Chrdl2
Chrm1
Chrm2
Chrm3
Chrm4
Chrna1
Chrna10
Chrna2
Chrna4
Chrna5
Chrnb1
Chrnb2
Chrne
Chst1
Chst10
Chst11
Chst12
Chst14
Chst2
Chst4
Chst5
Chst8
Chsy1
Chtf18
Chtf8
Chtop
Churc1
Ciao1
Cib1
Cib2
Cic
Cidea
Cideb
Ciita
Cilp2
Cinp
Cipc
Cir1
Cirbp
Cisd1
Cisd2
Cish
Cit
Cited1
Cited2
Cited4
Ciz1
Ckap4
Ckap5
Ckb
Cklf
Ckm
Ckmt1b
Cks1b
Cks2
Clasp1
Clasp2
Clasrp
Clca1
Clca2
Clca4
Clca4l
Clcc1
Clcf1
Clcn1
Clcn2
Clcn3
Clcn4
Clcn6
Clcn7
Clcnka
Cldn1
Cldn10
Cldn11
Cldn12
Cldn17
Cldn18
Cldn2
Cldn22
Cldn3
Cldn4
Cldn5
Cldn6
Cldn7
Cldnd1
Clec10a
Clec11a
Clec12a
Clec14a
Clec16a
Clec1a
Clec1b
Clec2d
Clec2l
Clec3b
Clec4a
Clec4a1
Clec4a3
Clec4f
Clec7a
Clec9a
Clic1
Clic2
Clic3
Clic4
Clint1
Clip1
Clip2
Clip4
Clk1
Clk2
Clk4
Clmp
Cln3
Cln5
Cln6
Cln8
Clock
Clp1
Clpb
Clpp
Clps
Clptm1
Clstn1
Clstn2
Clstn3
Clta
Cltb
Cluap1
Cluh
Clybl
Cma1
Cmah
Cmas
Cmbl
Cmc2
Cmip
Cmklr1
Cmpk1
Cmpk2
Cmtm2a
Cmtm3
Cmtm5
Cmtm6
Cmtm7
Cmtm8
Cmya5
[truncated: 11,133 more rows]
