# Supplementary material for: MicroRNA-138-5p Targets Pro-Apoptotic Factors and Favors Neural Cell Survival: Analysis in the Injured Spinal Cord
Source: Biomedicines. 2022 Jun 30;10(7):1559. doi: 10.3390/biomedicines10071559 (PMC9312482; doi:10.3390/biomedicines10071559)
Supplement: Supplementary file 1 [file biomedicines-10-01559-s001.zip › Table S5. M. Maza and Barreda-Manso et al..xls]

## Sheet: S5. GOterms BP
Article title: MicroRNA-138-5p targets pro-apoptotic factors and favours neural cell survival: analysis in the injured spinal cord
Authors: Rodrigo M Maza, M. Asunción Barreda-Manso, David Reigada, Agata Silván, Teresa Muñoz-Galdeano, Altea Soto, Ángela del Águila, Manuel Nieto-Diaz
Supplementary Table S5. Gene Ontology terms. List of Gene Ontology terms for biological processes of the miR-138-5p targets dysregulated after SCI. GO terms related to apoptosis or cell cycle are highlighted.
Term	Count	% of genes	p value	Genes
GO:0000122~negative regulation of transcription from RNA polymerase II promoter	16	7.58294	0.0222719	CIITA, TXNIP, THRB, RELA, KLF11, TP53, NR4A3, CBX7, NKX6-1, MEN1, SHOX2, NOTCH2, PDE2A, GATAD2A, ID4, RARA
GO:0000226~microtubule cytoskeleton organization	4	1.89573	0.0695903	DYNC1LI2, PTK2, CNTN2, CLASP2
GO:0001568~blood vessel development	6	2.8436	0.0011656	PTK2, GATAD2A, TGFBR3, PDGFRB, STRA6, GJA5
GO:0001666~response to hypoxia	8	3.79147	0.0339496	ICAM1, CASP3, HMOX1, ARNT2, NPPC, ADAM17, TGFBR3, MB
GO:0001701~in utero embryonic development	11	5.21327	0.0013398	MGAT1, NOTCH2, GNA12, PITPNB, ARNT2, TP53, GATAD2A, TGFBR3, PDGFRB, SLC39A3, AXIN1
GO:0001776~leukocyte homeostasis	2	0.947867	0.0868597	MEN1, BAK1
GO:0001782~B cell homeostasis	3	1.4218	0.0320991	BAK1, CASP3, IKBKB
GO:0001889~liver development	6	2.8436	0.024458	ALDH1A1, NOTCH2, RELA, ATG7, TGFBR3, RARA
GO:0001974~blood vessel remodeling	3	1.4218	0.0881782	BAK1, TGM2, TGFBR3
GO:0003281~ventricular septum development	4	1.89573	0.00894742	PDE2A, LUZP1, STRA6, GJA5
GO:0006351~transcription, DNA-templated	15	7.109	0.0632198	TXNIP, CNOT8, THRB, ATP1B4, TP53, NR3C1, CBX7, UIMC1, USF2, MEN1, NOTCH2, CDYL, OLIG1, RARA, PHF5A
GO:0006366~transcription from RNA polymerase II promoter	11	5.21327	0.0155922	PLAG1, PHRF1, RELA, ARNT2, CREB3L2, CREB3L1, NEUROD1, NR4A3, NR3C1, USF2, NKX6-1
GO:0006635~fatty acid beta-oxidation	3	1.4218	0.0950978	PPARD, ABCD2, FABP3
GO:0006813~potassium ion transport	4	1.89573	0.0416247	ATP4B, ATP1B4, KCNH2, GJA5
GO:0006814~sodium ion transport	4	1.89573	0.0755798	SCN1B, ATP4B, ATP1B4, SCN8A
GO:0006886~intracellular protein transport	7	3.31754	0.0297029	GLG1, CTTN, AP3M1, TBC1D14, DYNLT1, RPH3A, RIMS2
GO:0006914~autophagy	6	2.8436	0.00248546	MAP1LC3A, PLEKHM1, ATG7, RNF185, DAP, OPTN
GO:0006915~apoptotic process	12	5.6872	0.00303615	BAK1, PPARD, CASP3, CASP7, SHISA5, TP53, FADD, DAP, INPP5D, UNC5C, CTSH, AXIN1
GO:0006979~response to oxidative stress	6	2.8436	0.0251013	ALDH1A1, TXNIP, SLC23A2, HMOX1, TP53, RCAN2
GO:0007049~cell cycle	8	3.79147	0.000427095	ARL2, TXNIP, PPP1CA, GNAI2, MAPK6, TBRG1, TP53, SMPD3
GO:0007050~cell cycle arrest	4	1.89573	0.0530076	MEN1, NOTCH2, TBRG1, TP53
GO:0007155~cell adhesion	8	3.79147	0.0288662	ICAM1, ATP4B, SORBS2, PODXL, CNTN2, CD99L2, ADAM17, EMB
GO:0007179~transforming growth factor beta receptor signaling pathway	4	1.89573	0.0416247	PTK2, FERMT2, TP53, TGFBR3
GO:0007219~Notch signaling pathway	5	2.36967	0.0293616	NOTCH2, KRT19, SORBS2, ADAM17, RCAN2
GO:0007249~I-kappaB kinase/NF-kappaB signaling	3	1.4218	0.0562111	TIFAB, RELA, IKBKB
GO:0007266~Rho protein signal transduction	3	1.4218	0.0814191	GNA12, TAX1BP3, MCF2L
GO:0007275~multicellular organism development	7	3.31754	0.0900686	SHOX2, LTBR, TP53, CREB3L1, UNC5C, IGFBP2, SMPD3
GO:0007420~brain development	10	4.73934	0.00765435	MEN1, BAK1, CTTN, ARNT2, ID4, UNC5C, NR3C1, RPH3A, KCNH2, KCNK3
GO:0007507~heart development	8	3.79147	0.0446113	PPARD, CASP3, PDE2A, CASP7, TP53, STRA6, GJA5, MB
GO:0007568~aging	11	5.21327	0.00316175	CIITA, BAK1, RELA, ATG7, CASP7, TP53, HSPB1, PDGFRB, NR3C1, IGFBP2, SMPD3
GO:0007605~sensory perception of sound	6	2.8436	0.017049	ICAM1, CASP3, THRB, SCN8A, AXIN1, GJB2
GO:0007612~learning	4	1.89573	0.0386261	ARC, SLC6A1, CNTN2, STRA6
GO:0007628~adult walking behavior	4	1.89573	0.011031	ATG7, CNTN2, SCN8A, AXIN1
GO:0008016~regulation of heart contraction	4	1.89573	0.00304458	CAV3, GNAI2, THRB, CACNA1B
GO:0008104~protein localization	4	1.89573	0.0619581	CAV3, TP53, PLLP, AKAP2
GO:0008211~glucocorticoid metabolic process	2	0.947867	0.0764268	CYP11B1, NR3C1
GO:0008219~cell death	3	1.4218	0.0716051	HMOX1, EMP1, AXIN1
GO:0008284~positive regulation of cell proliferation	16	7.58294	0.000609458	CAV3, CNOT8, GNAI2, THRB, RELA, ARNT2, OPTN, NOTCH2, PTK2, ADAM17, TGFBR3, PDGFRB, ID4, RARA, IKBKB, CTSH
GO:0008285~negative regulation of cell proliferation	14	6.63507	0.000340271	KLF11, FGFRL1, TP53, GNRHR, TAX1BP3, MEN1, NOTCH2, SH3BP4, BAK1, HMOX1, TBRG1, NPPC, RARA, INPP5D
GO:0008340~determination of adult lifespan	3	1.4218	0.0191211	IDE, TP53, INPP5D
GO:0008360~regulation of cell shape	7	3.31754	0.00308574	CCL24, ICAM1, PTK2, GNA12, RHOQ, WIPF1, SEMA4A
GO:0009411~response to UV	4	1.89573	0.0169006	MEN1, CASP3, CASP7, TP53
GO:0009749~response to glucose	6	2.8436	0.00705015	TXNIP, PPARD, CASP3, PTK2, ATG7, NEUROD1
GO:0010033~response to organic substance	6	2.8436	0.029345	PPARD, CASP3, PTK2, SLC6A1, RELA, ABCG1
GO:0010243~response to organonitrogen compound	4	1.89573	0.0416247	PTK2, SLC6A1, ATP4B, TP53
GO:0010332~response to gamma radiation	3	1.4218	0.0950978	MEN1, BAK1, TP53
GO:0010628~positive regulation of gene expression	10	4.73934	0.0255851	MEN1, PLAG1, PDE2A, CYP26B1, TP53, RARA, HSPA4, ID4, RIMS2, CTSH
GO:0010629~negative regulation of gene expression	7	3.31754	0.033412	PLAG1, BAK1, TP53, TGFBR3, RARA, HSPA4, AXIN1
GO:0010815~bradykinin catabolic process	2	0.947867	0.0658754	IDE, CTSH
GO:0014068~positive regulation of phosphatidylinositol 3-kinase signaling	4	1.89573	0.0357425	PPARD, PTK2, PDGFRB, RARA
GO:0014070~response to organic cyclic compound	10	4.73934	0.00386095	ALDH1A1, ICAM1, BAK1, CASP3, PTK2, SLC6A1, RELA, TP53, PDGFRB, CACNA1B
GO:0016049~cell growth	4	1.89573	0.0198564	CAV3, NOTCH2, TGFBR3, EMP1
GO:0016239~positive regulation of macroautophagy	3	1.4218	0.0252664	HMOX1, ATG7, BNIP3L
GO:0016264~gap junction assembly	2	0.947867	0.0764268	GJA5, GJB2
GO:0016477~cell migration	6	2.8436	0.073447	ARC, SORBS2, PODXL, PDGFRB, CLASP2, TNFAIP1
GO:0016485~protein processing	5	2.36967	0.019677	UQCRC2, PCSK2, CASP3, CASP7, IDE
GO:0021766~hippocampus development	4	1.89573	0.0926076	CASP3, RARA, ID4, NR4A3
GO:0021955~central nervous system neuron axonogenesis	2	0.947867	0.0868597	PTK2, ATG7
GO:0022010~central nervous system myelination	2	0.947867	0.0971753	CNTN2, ID4
GO:0030324~lung development	5	2.36967	0.06268	PPP1CA, CLCN2, AARD, STRA6, NR3C1
GO:0030325~adrenal gland development	3	1.4218	0.0591866	PDGFRB, STRA6, NR3C1
GO:0030326~embryonic limb morphogenesis	4	1.89573	0.0343441	SHOX2, NOTCH2, CYP26B1, GJA5
GO:0030335~positive regulation of cell migration	6	2.8436	0.0831897	CCL24, PTK2, PODXL, ADAM17, PDGFRB, CTSH
GO:0030511~positive regulation of transforming growth factor beta receptor signaling pathway	4	1.89573	0.00240967	MEN1, ADAM17, TGFBR3, AXIN1
GO:0030512~negative regulation of transforming growth factor beta receptor signaling pathway	4	1.89573	0.0230789	GLG1, TP53, ADAM17, TGFBR3
GO:0030516~regulation of axon extension	3	1.4218	0.0154334	CTTN, CLASP2, NKX6-1
GO:0030522~intracellular receptor signaling pathway	3	1.4218	0.0532904	PPARD, THRB, NR4A3
GO:0030823~regulation of cGMP metabolic process	2	0.947867	0.0868597	PDE2A, NPPC
GO:0030853~negative regulation of granulocyte differentiation	2	0.947867	0.0971753	RARA, INPP5D
GO:0031018~endocrine pancreas development	3	1.4218	0.0370102	BAK1, NEUROD1, NKX6-1
GO:0031113~regulation of microtubule polymerization	2	0.947867	0.0658754	ARL2, CLASP2
GO:0031116~positive regulation of microtubule polymerization	3	1.4218	0.0210898	CAV3, ARL2, CLIP1
GO:0032355~response to estradiol	10	4.73934	0.000475436	ALDH1A1, TXNIP, CASP3, PTK2, SLC6A1, ARNT2, PDGFRB, RARA, IGFBP2, GJB2
GO:0032471~negative regulation of endoplasmic reticulum calcium ion concentration	2	0.947867	0.0868597	BAK1, TGM2
GO:0032496~response to lipopolysaccharide	7	3.31754	0.0982295	ICAM1, CASP3, LTBR, ATP4B, RELA, ADAM17, IKBKB
GO:0032526~response to retinoic acid	6	2.8436	0.00168501	ALDH1A1, TP53, PDGFRB, RARA, IGFBP2, CTSH
GO:0033077~T cell differentiation in thymus	3	1.4218	0.0684261	TP53, ADAM17, FADD
GO:0035025~positive regulation of Rho protein signal transduction	3	1.4218	0.0345203	F2RL2, PDGFRB, MCF2L
GO:0035264~multicellular organism growth	5	2.36967	0.0312061	PLAG1, NOTCH2, SLC25A25, TP53, RARA
GO:0035556~intracellular signal transduction	10	4.73934	0.0293637	CASP3, GNAI2, PLEKHM1, HMOX1, GNA12, HSPB1, TGFBR3, PDGFRB, INPP5D, MCF2L
GO:0035725~sodium ion transmembrane transport	4	1.89573	0.0447372	SCN1B, SLC23A2, SLC6A8, SCN8A
GO:0035791~platelet-derived growth factor receptor-beta signaling pathway	2	0.947867	0.055204	PDGFRB, CLASP2
GO:0035794~positive regulation of mitochondrial membrane permeability	2	0.947867	0.0444113	BNIP3L, TP53
GO:0042060~wound healing	6	2.8436	0.0142019	NOTCH2, PPARD, CASP3, TP53, PDGFRB, OPTN
GO:0042493~response to drug	19	9.00474	3.1829e-05	TXNIP, ICAM1, CYP11B1, RELA, GNA12, TP53, CBX7, KCNK3, NKX6-1, ALDH1A1, BAK1, PTK2, CASP3, NPPC, FABP3, ADAM17, NEUROD1, IGFBP2, IKBKB
GO:0042542~response to hydrogen peroxide	8	3.79147	2.82422e-05	TXNIP, BAK1, CASP3, RELA, HMOX1, PDGFRB, NR4A3, MB
GO:0042573~retinoic acid metabolic process	3	1.4218	0.0137186	ALDH1A1, CYP26B1, STRA6
GO:0043029~T cell homeostasis	3	1.4218	0.0504261	CASP3, FADD, SLC39A3
GO:0043065~positive regulation of apoptotic process	18	8.53081	3.04436e-07	TXNIP, KLF11, TP53, FADD, ALDH1A1, MEN1, BAK1, NOTCH2, CASP3, HMOX1, ATG7, BNIP3L, TGM2, RBCK1, NEUROD1, PDGFRB, UNC5C, INPP5D
GO:0043066~negative regulation of apoptotic process	15	7.109	0.00227888	PPARD, RELA, ARNT2, TP53, NR4A3, PTK2, CASP3, ATG7, BNIP3L, ADAM17, PDGFRB, HSPB1, HSPA4, RARA, CTSH
GO:0043123~positive regulation of I-kappaB kinase/NF-kappaB signaling	8	3.79147	0.00178883	LTBR, SLC35B2, RELA, HMOX1, SHISA5, TGM2, RBCK1, FADD
GO:0043200~response to amino acid	4	1.89573	0.0277907	ICAM1, CASP3, RELA, TP53
GO:0043278~response to morphine	3	1.4218	0.0881782	MAP1LC3A, RELA, FADD
GO:0043401~steroid hormone mediated signaling pathway	4	1.89573	0.0277907	PPARD, THRB, RARA, NR4A3
GO:0045333~cellular respiration	3	1.4218	0.0172349	SLC25A25, COQ10B, NR4A3
GO:0045471~response to ethanol	7	3.31754	0.0226233	ALDH1A1, ICAM1, BAK1, NPPC, TP53, RARA, CACNA1B
GO:0045766~positive regulation of angiogenesis	5	2.36967	0.0436828	CCL24, HMOX1, HSPB1, HSPA4, CTSH
GO:0045787~positive regulation of cell cycle	3	1.4218	0.0684261	TP53, RARA, NR4A3
GO:0045892~negative regulation of transcription, DNA-templated	12	5.6872	0.0394789	CIITA, MEN1, THRB, RELA, KLF11, TP53, GATAD2A, PEX14, RARA, ID4, DAP, UIMC1
GO:0045893~positive regulation of transcription, DNA-templated	13	6.16114	0.0290406	CIITA, MEN1, PPARD, RELA, ARNT2, TP53, CREB3L2, NEUROD1, RARA, NR4A3, PHF5A, USF2, AXIN1
GO:0045909~positive regulation of vasodilation	4	1.89573	0.0103082	PPARD, PTK2, NPPC, GJA5
GO:0045944~positive regulation of transcription from RNA polymerase II promoter	20	9.47867	0.0229539	CIITA, PLAG1, THRB, RELA, ARNT2, TP53, RHOQ, FADD, NR4A3, NR3C1, MCF2L, USF2, SHOX2, MEN1, CREB3L2, RBCK1, NEUROD1, ID4, RARA, IKBKB
GO:0046677~response to antibiotic	3	1.4218	0.0986144	CIITA, CASP3, TP53
GO:0046697~decidualization	3	1.4218	0.0448735	MEN1, PPARD, GJB2
GO:0048096~chromatin-mediated maintenance of transcription	2	0.947867	0.0868597	PADI2, NR3C1
GO:0048568~embryonic organ development	3	1.4218	0.0881782	THRB, TP53, PDGFRB
GO:0048661~positive regulation of smooth muscle cell proliferation	5	2.36967	0.0144959	PTK2, HMOX1, TGM2, PDGFRB, NR4A3
GO:0048662~negative regulation of smooth muscle cell proliferation	3	1.4218	0.0748313	PPARD, HMOX1, TP53
GO:0048791~calcium ion-regulated exocytosis of neurotransmitter	3	1.4218	0.0684261	SYT15, RPH3A, RIMS2
GO:0051092~positive regulation of NF-kappaB transcription factor activity	5	2.36967	0.0425504	ICAM1, RELA, RBCK1, TGFBR3, IKBKB
GO:0051260~protein homooligomerization	9	4.2654	0.00171286	SLC6A1, HMOX1, IDE, FGFRL1, TGM2, PEX14, OPTN, TNFAIP1, AXIN1
GO:0051291~protein heterooligomerization	5	2.36967	0.0267195	IDE, FGFRL1, KCNH2, AKAP2, TNFAIP1
GO:0051301~cell division	6	2.8436	0.0529289	PPP1CA, GNAI2, DYNLT1, CLASP2, CCNA1, CDC25A
GO:0051402~neuron apoptotic process	3	1.4218	0.0881782	CASP3, CASP7, TP53
GO:0051924~regulation of calcium ion transport	3	1.4218	0.0652956	CAV3, GNAI2, CACNA1B
GO:0055091~phospholipid homeostasis	2	0.947867	0.0971753	FABP3, ABCG1
GO:0055099~response to high density lipoprotein particle	2	0.947867	0.0334959	ADAM17, ABCG1
GO:0060307~regulation of ventricular cardiac muscle cell membrane repolarization	4	1.89573	0.000858013	CAV3, SCN1B, KCNH2, GJA5
GO:0060371~regulation of atrial cardiac muscle cell membrane depolarization	2	0.947867	0.0868597	SCN1B, GJA5
GO:0060373~regulation of ventricular cardiac muscle cell membrane depolarization	2	0.947867	0.0658754	CAV3, GJA5
GO:0060412~ventricular septum morphogenesis	3	1.4218	0.0504261	FGFRL1, TGFBR3, GJA5
GO:0060437~lung growth	2	0.947867	0.055204	GGCX, PDGFRB
GO:0061469~regulation of type B pancreatic cell proliferation	2	0.947867	0.0764268	MEN1, NR4A3
GO:0071260~cellular response to mechanical stimulus	5	2.36967	0.0312061	BAK1, LTBR, PDE2A, FADD, AFAP1
GO:0071346~cellular response to interferon-gamma	4	1.89573	0.0316347	CIITA, CCL24, ICAM1, CYP11B1
GO:0071347~cellular response to interleukin-1	4	1.89573	0.0993682	CCL24, ICAM1, RELA, SMPD3
GO:0071375~cellular response to peptide hormone stimulus	4	1.89573	0.00894742	MEN1, CYP11B1, RELA, NKX6-1
GO:0071456~cellular response to hypoxia	6	2.8436	0.0196927	ICAM1, PPARD, HMOX1, BNIP3L, TP53, KCNK3
GO:0071548~response to dexamethasone	3	1.4218	0.0532904	GGCX, CYP11B1, NR3C1
GO:0086005~ventricular cardiac muscle cell action potential	3	1.4218	0.0120929	CAV3, KCNH2, GJA5
GO:0086010~membrane depolarization during action potential	3	1.4218	0.0395669	SCN8A, KCNH2, CACNA1B
GO:0086091~regulation of heart rate by cardiac conduction	3	1.4218	0.0395669	SCN1B, KCNH2, GJA5
GO:0090002~establishment of protein localization to plasma membrane	3	1.4218	0.084778	CAV3, CLASP2, IKBKB
GO:0097190~apoptotic signaling pathway	5	2.36967	0.00343153	BAK1, PPARD, LTBR, FADD, DAP
GO:1900825~regulation of membrane depolarization during cardiac muscle cell action potential	2	0.947867	0.0224565	CAV3, GJA5
GO:1901017~negative regulation of potassium ion transmembrane transporter activity	2	0.947867	0.0658754	CAV3, CASQ2
GO:1901380~negative regulation of potassium ion transmembrane transport	2	0.947867	0.0971753	CAV3, KCNH2
GO:1903146~regulation of mitophagy	3	1.4218	0.0370102	CTTN, ATG7, BNIP3L
GO:2001238~positive regulation of extrinsic apoptotic signaling pathway	3	1.4218	0.0504261	LTBR, RBCK1, FADD
